# Supplementary material for: Synthesis and Antileukemia Activity Evaluation of Benzophenanthridine Alkaloid Derivatives
Source: MDPI journal article supplement (doi:10.3390/molecules27123934), 2022-06-19
Supplement: s1 [file s1]

Supplementary Material

# Synthesis and Antileukemia Activity Evaluation of Benzophenanthridine Alkaloid Derivatives

Yaling Tang <sup>1</sup>, Xinglian Xu <sup>2,3</sup>, Jiang Li <sup>2,3</sup>, Lulu Deng <sup>2,3,\*</sup> and Shuzhen Mu <sup>2,3,\*</sup>

<sup>1</sup> College of Pharmacy, Guizhou University, Guiyang 550025, China; gs.yltang@gzu.edu.cn

<sup>2</sup> State Key Laboratory of Functions and Applications of Medicinal Plants, Guizhou Medical University, Guiyang 550014, China; xinglian\_xu2022@163.com (X.X.); jiangli@gzcnpcn (J.L.)

<sup>3</sup> The Key Laboratory of Chemistry for Natural Products of Guizhou Province, Chinese Academy of Sciences, Guiyang 550014, China

\* Correspondence: luludeng@gzcnpcn (L.D.); muzi0558@126.com (S.M.)

|                                                                                                                  |          |
|------------------------------------------------------------------------------------------------------------------|----------|
| 1. Table of contents.....                                                                                        | Page No. |
| 2. <sup>1</sup> H-NMR and <sup>13</sup> C-NMR spectra for compounds <b>1</b> and <b>2</b> .....                  | 2        |
| 3. <sup>1</sup> H-NMR, <sup>13</sup> C-NMR, and HR-ESI-MS spectra for compounds <b>1a–1u</b> and <b>2a–2l</b> .. | 4        |
| 4. The HPLC chromatograms of compounds <b>1</b> , <b>2</b> , <b>1a–1u</b> , and <b>2a–2l</b> .....               | 54       |
| 5. The preliminary screening results.....                                                                        | 66       |

**$^1\text{H}$ -NMR and  $^{13}\text{C}$ -NMR spectra for compounds 1 and 2****Compound 1**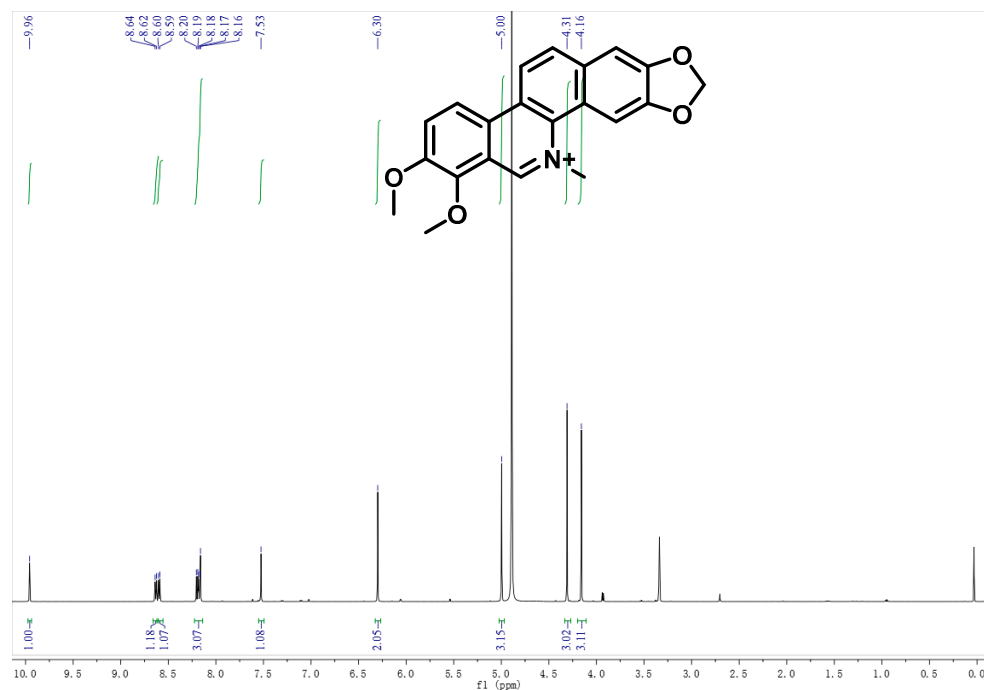**Figure S1.**  $^1\text{H}$ -NMR spectrum of 1 (600 MHz,  $\text{CD}_3\text{OD}$ ).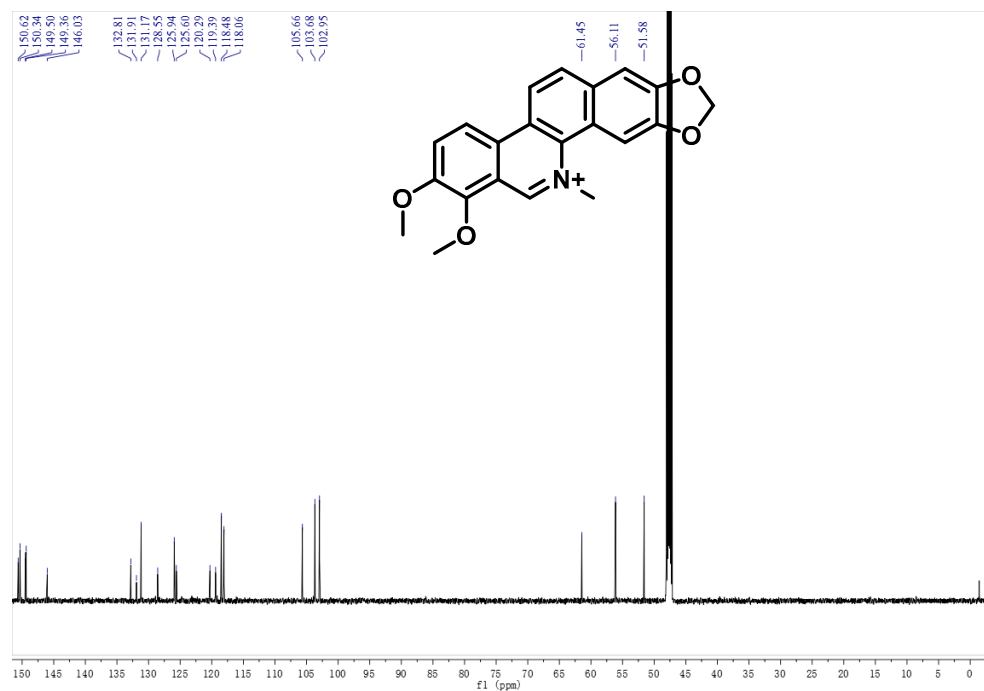**Figure S2.**  $^{13}\text{C}$ -NMR spectrum of 1 (150 MHz,  $\text{CD}_3\text{OD}$ ).

## Compound 2

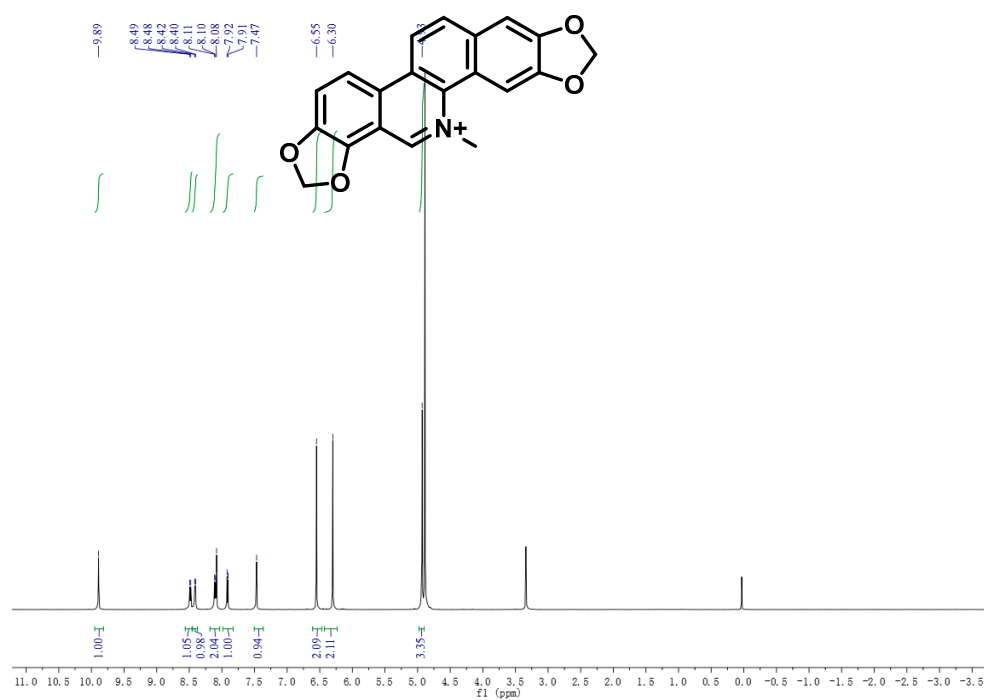Figure S3. <sup>1</sup>H-NMR spectrum of 2 (600 MHz, CD<sub>3</sub>OD).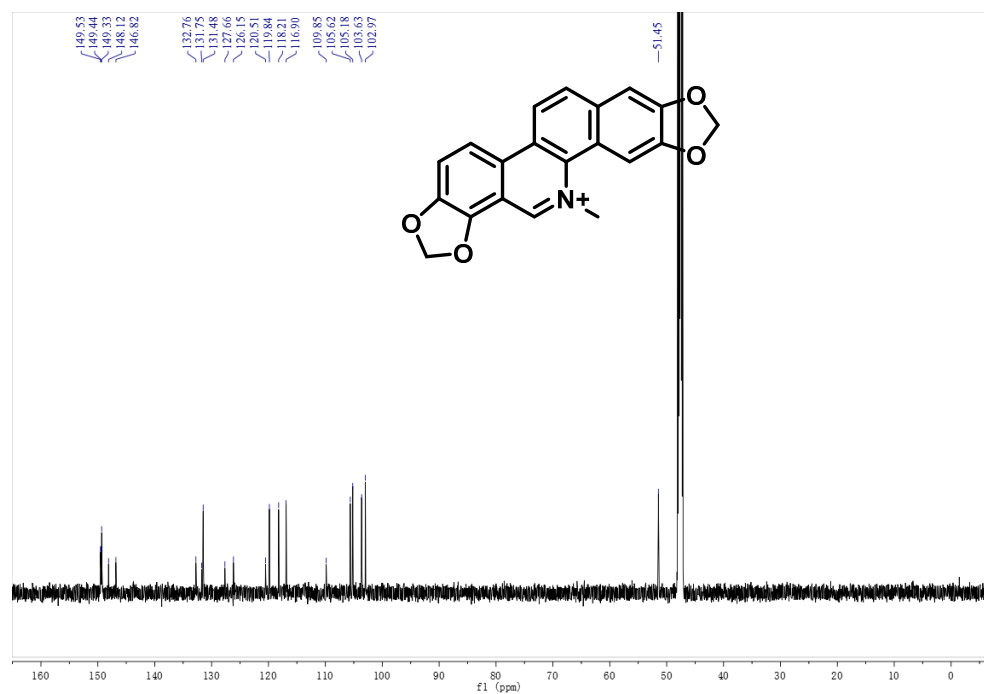Figure S4. <sup>13</sup>C-NMR spectrum of 2 (150 MHz, CD<sub>3</sub>OD).

**$^1\text{H}$ -NMR,  $^{13}\text{C}$ -NMR, and HR-ESI-MS spectra for compounds 1a–1u and 2a–2l****Compound 1a**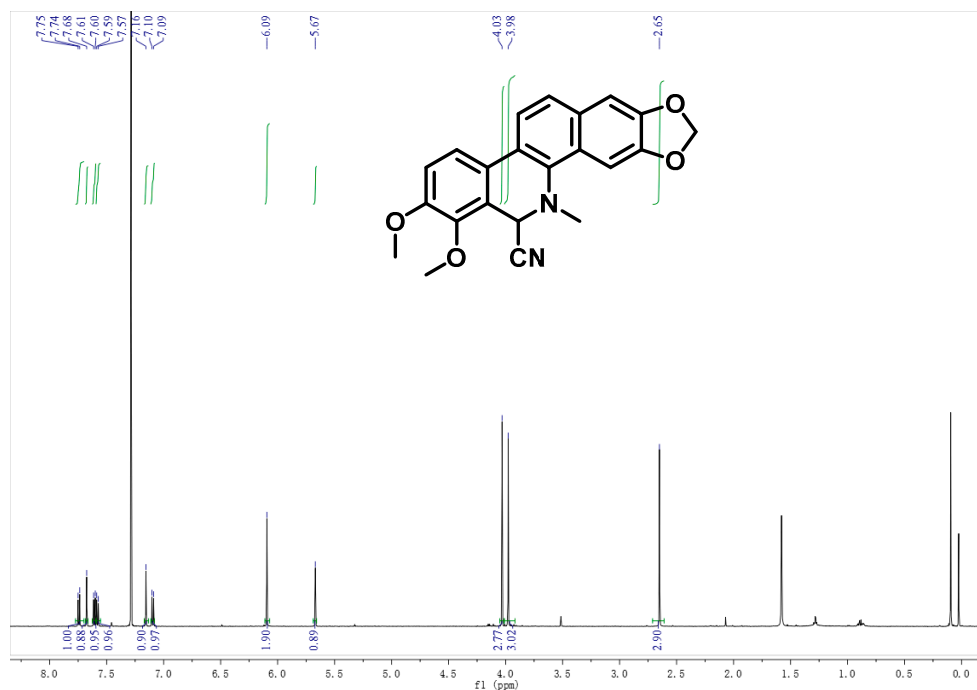**Figure S5.**  $^1\text{H}$ -NMR spectrum of 1a (600 MHz,  $\text{CDCl}_3$ ).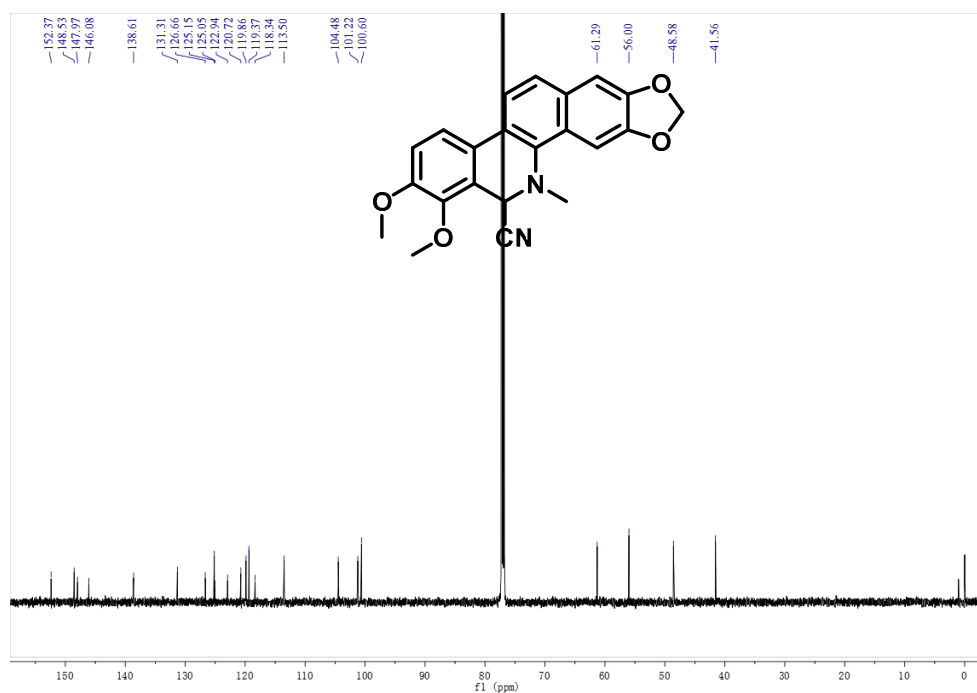**Figure S6.**  $^{13}\text{C}$ -NMR spectrum of 1a (150 MHz,  $\text{CDCl}_3$ ).



B-3 #83 RT: 0.37 AV: 1 NL: 1.54E7  
T: FTMS + p ESI Full ms [100.0000-1500.0000]

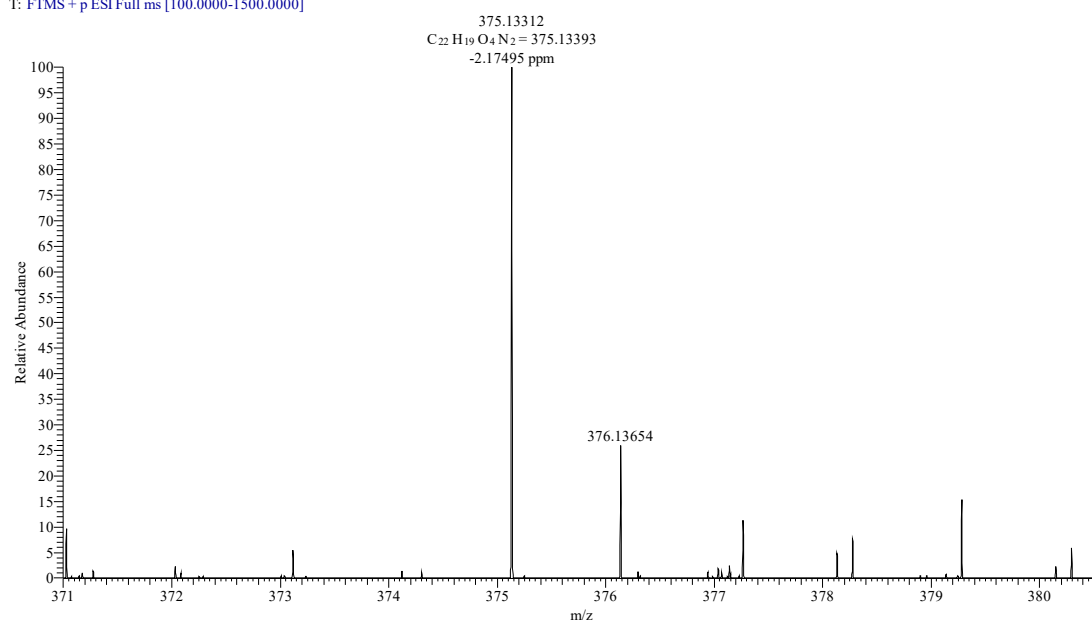

Figure S7. HR-ESI-MS spectrum of **1a**.

## Compound **1b**

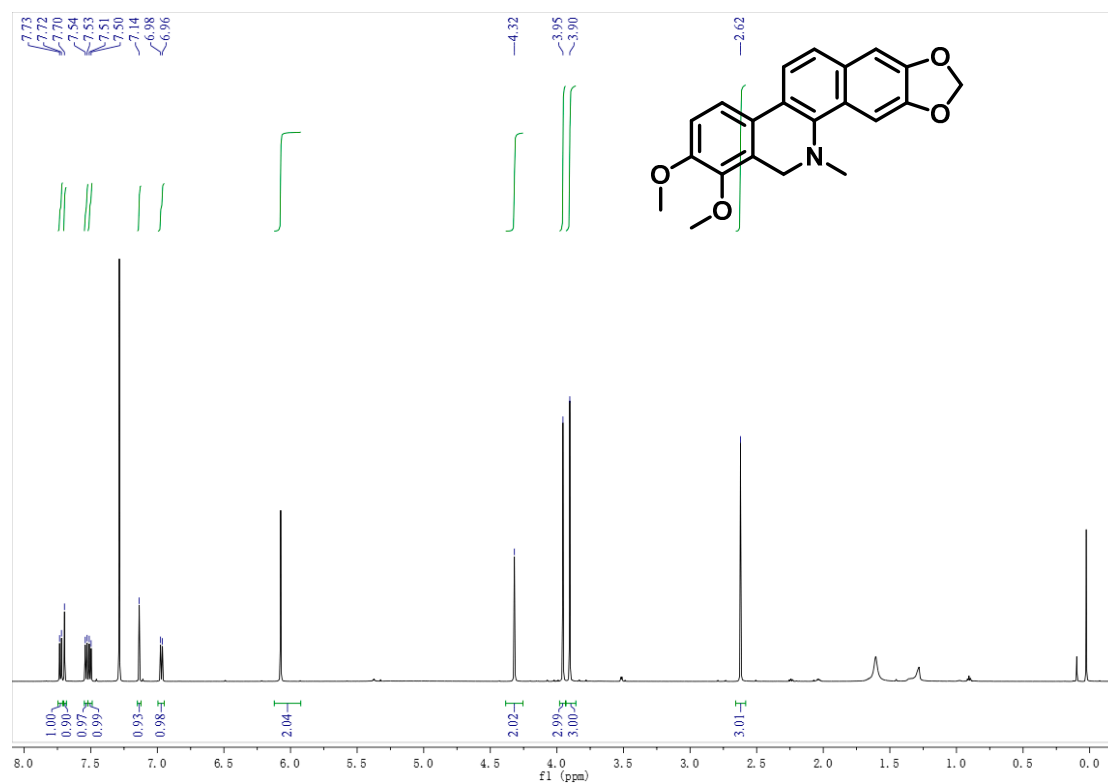

Figure S8.  $^1H$ -NMR spectrum of **1b** (600 MHz,  $CDCl_3$ ).

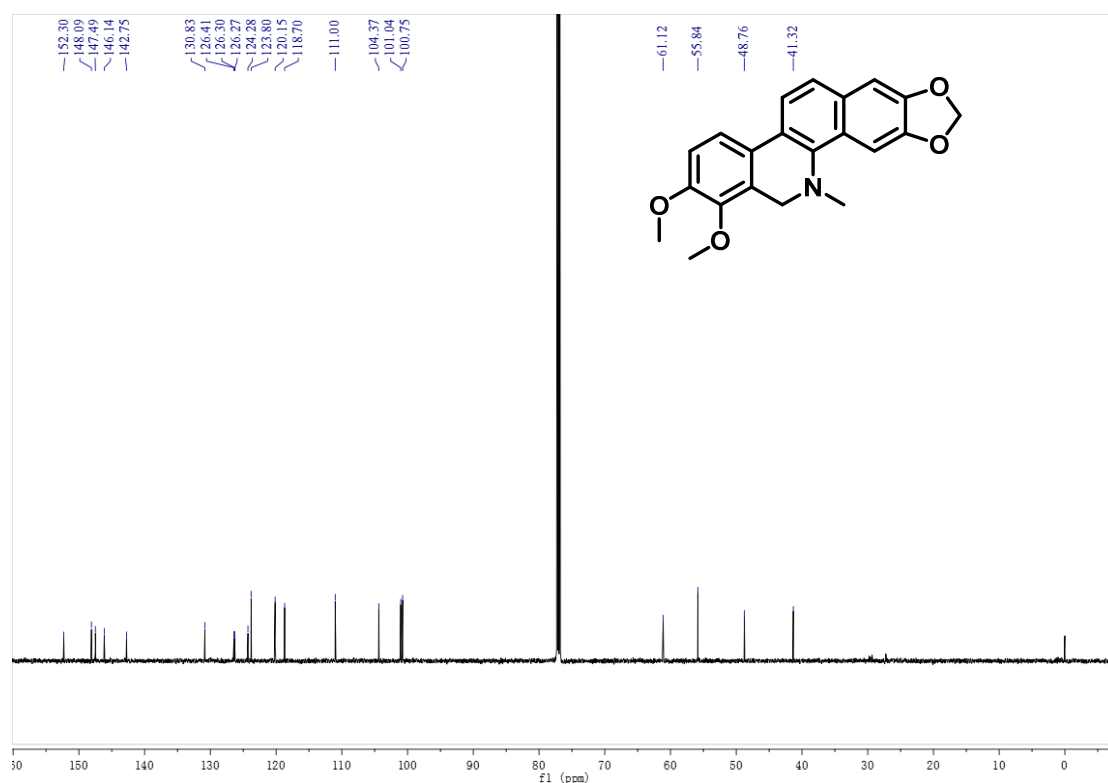

Figure S9. <sup>13</sup>C-NMR spectrum of **1b** (150 MHz, CDCl<sub>3</sub>).

B-4 #25 RT: 0.11 AV: 1 NL: 1.29E9  
T: FTMS + p ESI Full ms [100.0000-1500.0000]

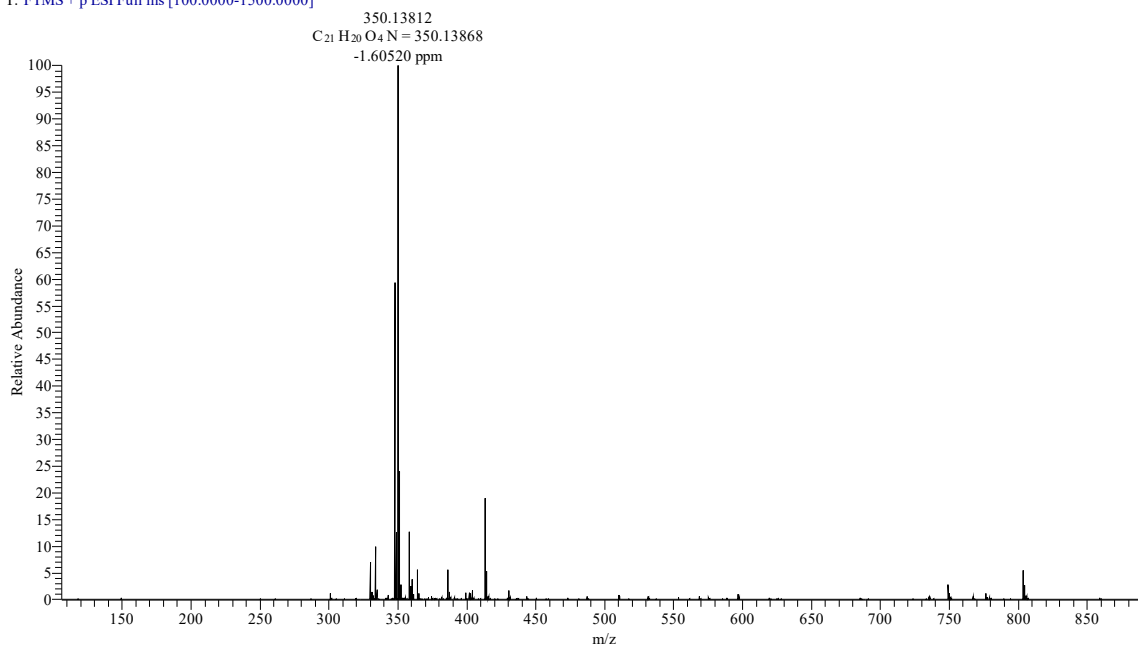

Figure S10. HR-ESI-MS spectrum of **1b**.

## Compound 1c

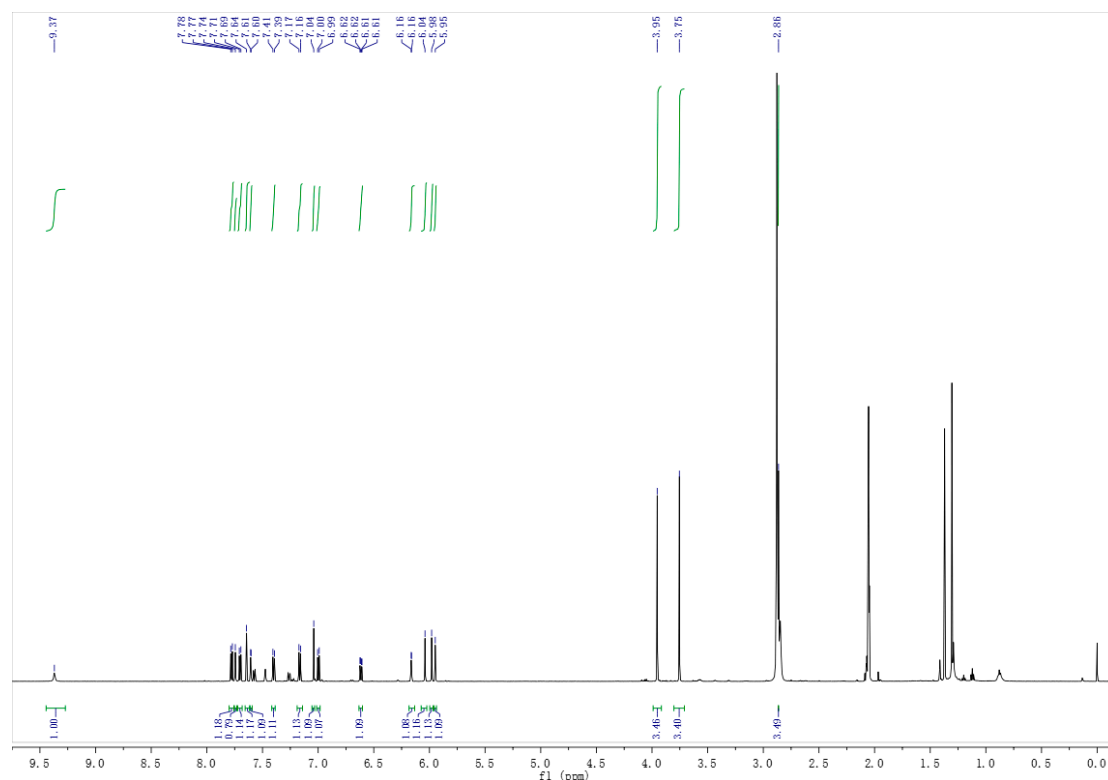Figure S11. <sup>1</sup>H-NMR spectrum of 1c (600 MHz, acetone-d<sub>6</sub>).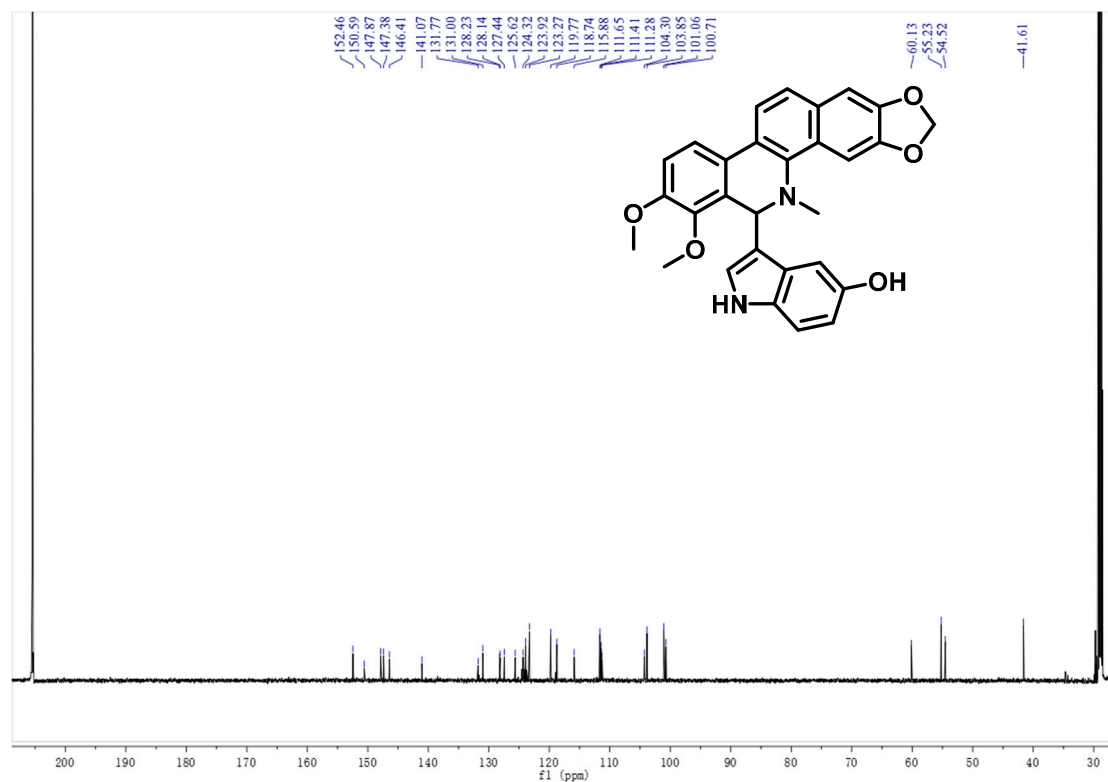Figure S12. <sup>13</sup>C-NMR spectrum of 1c (150 MHz, acetone-d<sub>6</sub>).

B-10 #26 RT: 0.12 AV: 1 NL: 1.15E9  
T: FTMS + p ESI Full ms [100.0000-1500.0000]

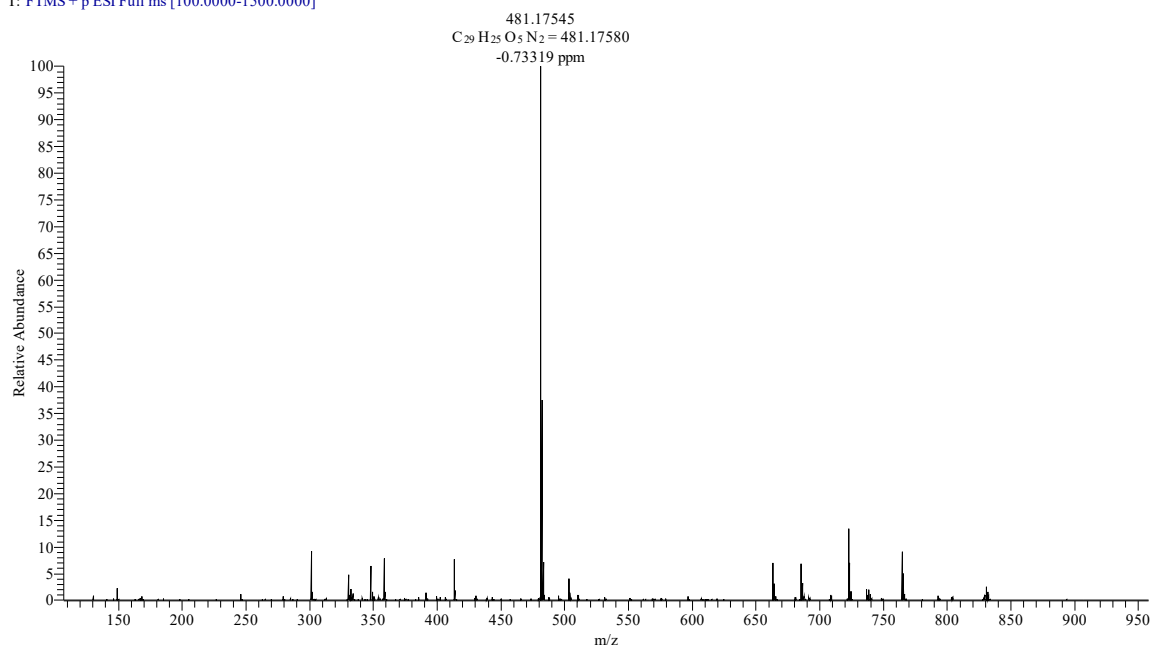

Figure S13. HR-ESI-MS spectrum of **1c**.

## Compound **1d**

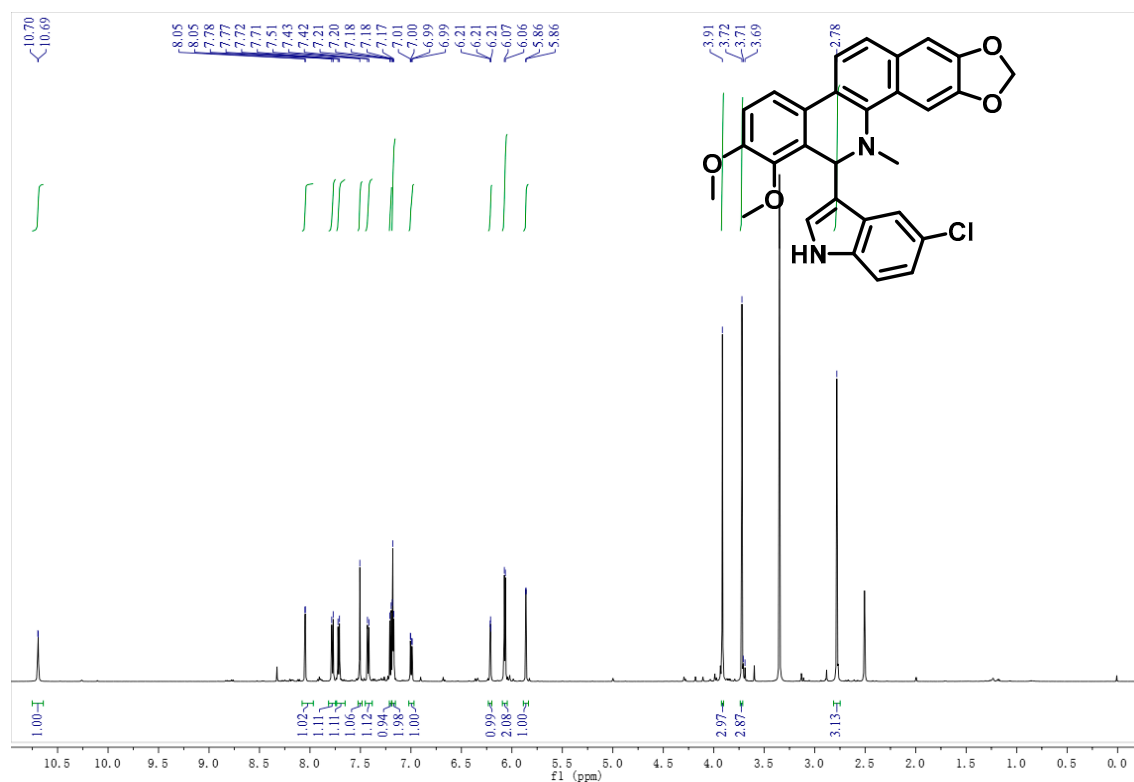

Figure S14.  $^1H$ -NMR spectrum of **1d** (600 MHz,  $DMSO-d_6$ ).

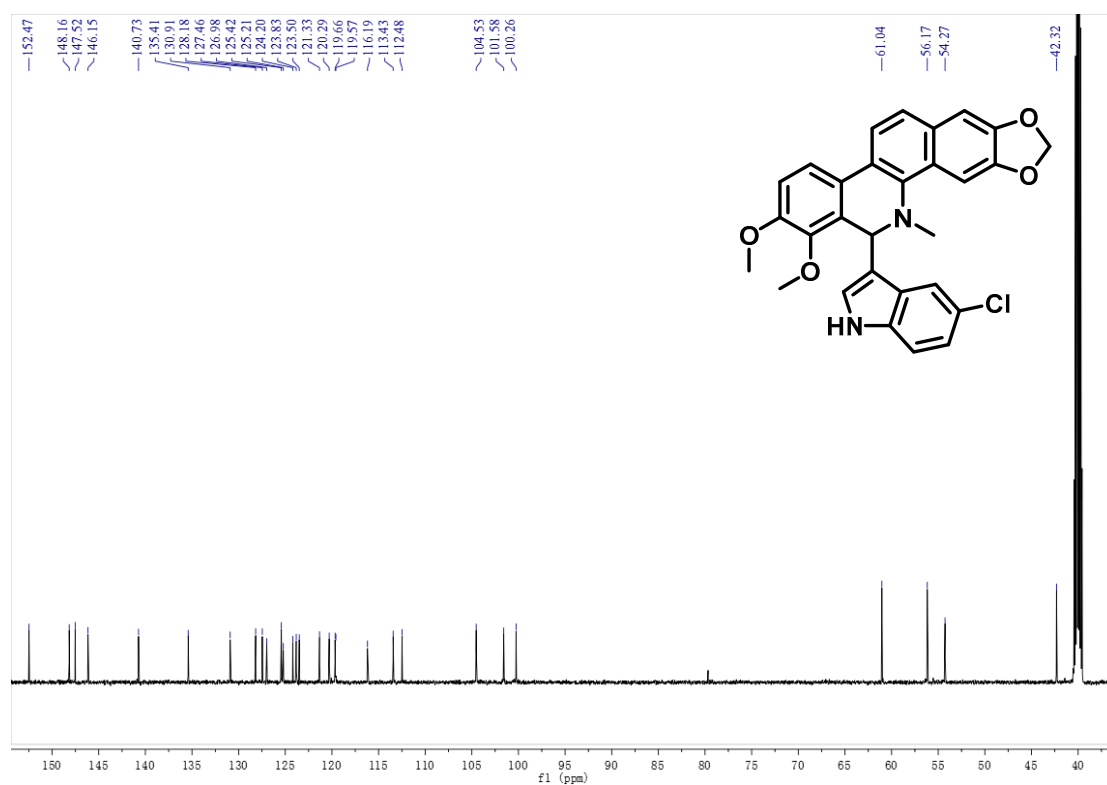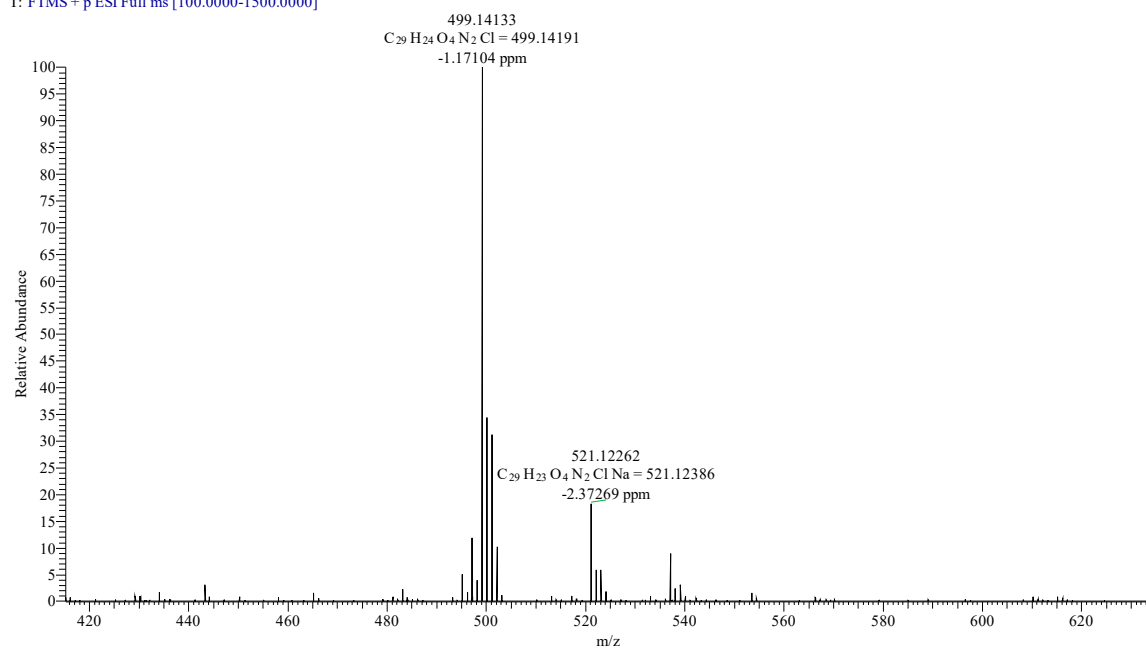

**Figure S16.** HR-ESI-MS spectrum of **1d**.

## Compound 1e

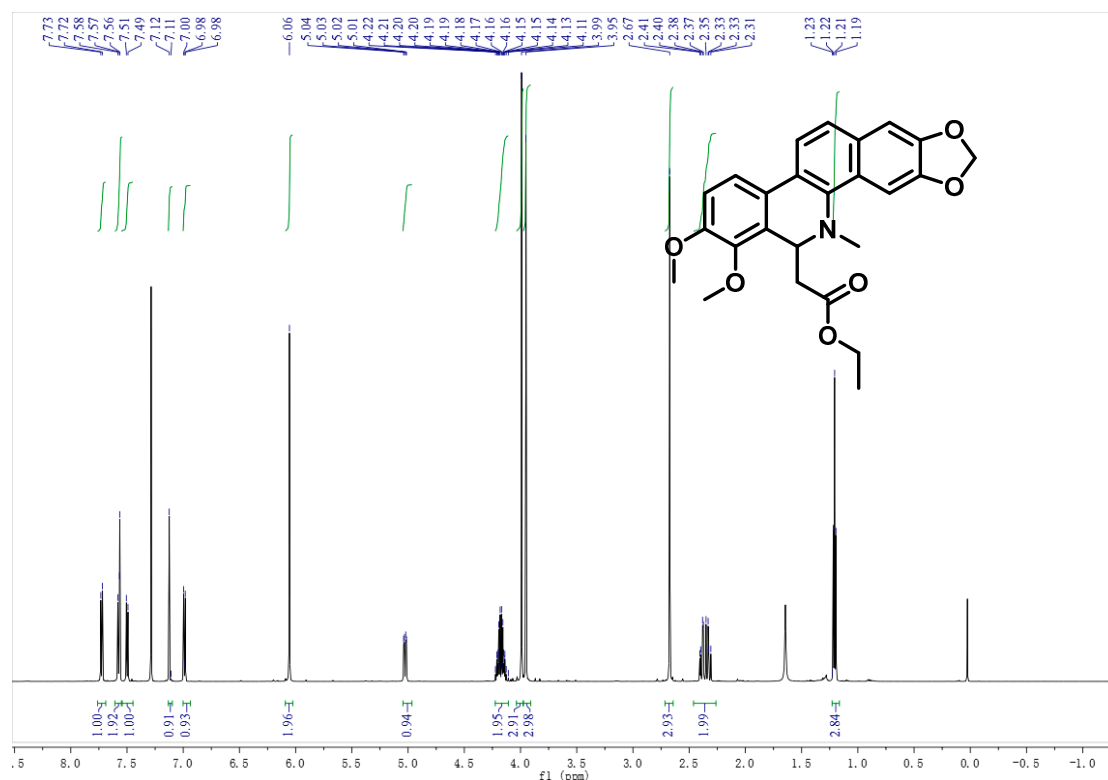Figure S17. <sup>1</sup>H-NMR spectrum of 1e (600 MHz, CDCl<sub>3</sub>).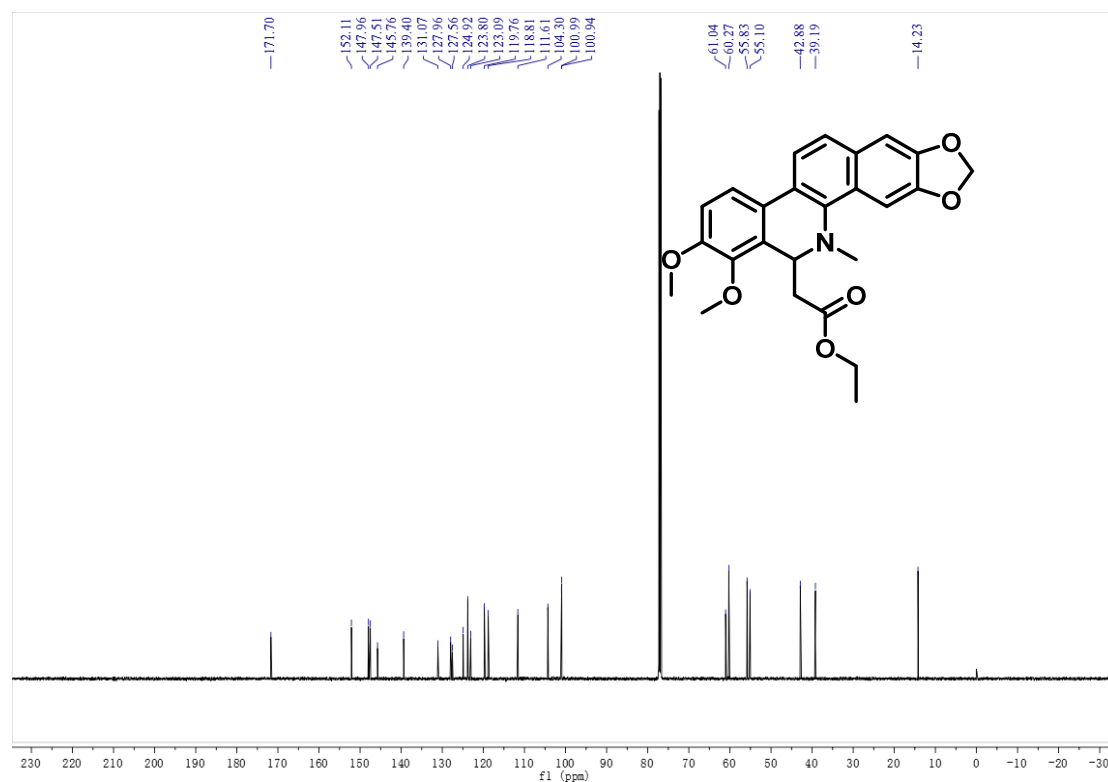Figure S18. <sup>13</sup>C-NMR spectrum of 1e (150 MHz, CDCl<sub>3</sub>).

B-15 #26 RT: 0.11 AV: 1 NL: 5.05E8  
T: FTMS + p ESI Full ms [100.0000-1500.0000]

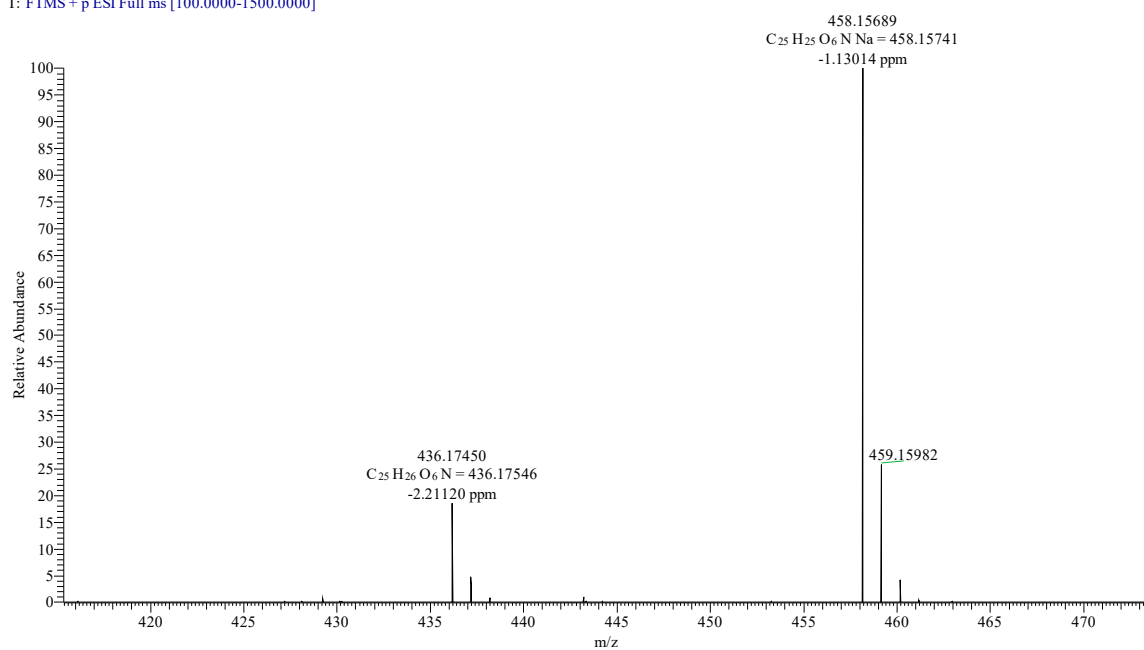

Figure S19. HR-ESI-MS spectrum of **1e**.

## Compound **1f**

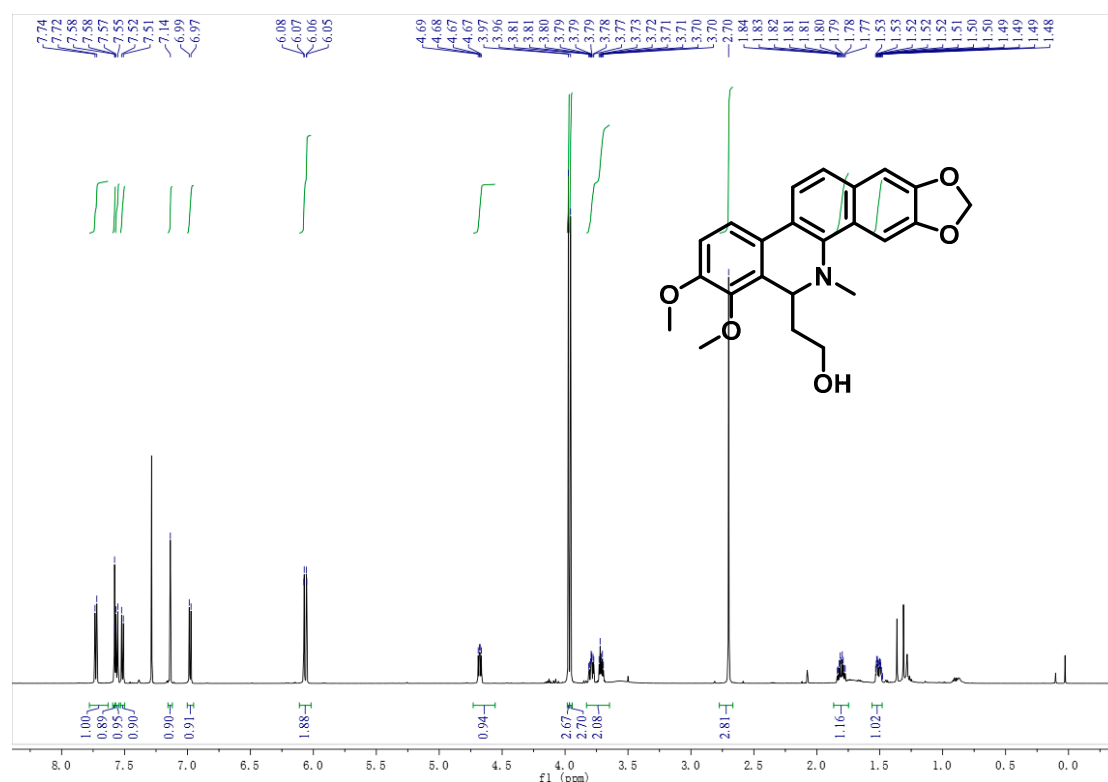

Figure S20.  $^1H$ -NMR spectrum of **1f** (600 MHz,  $CDCl_3$ ).

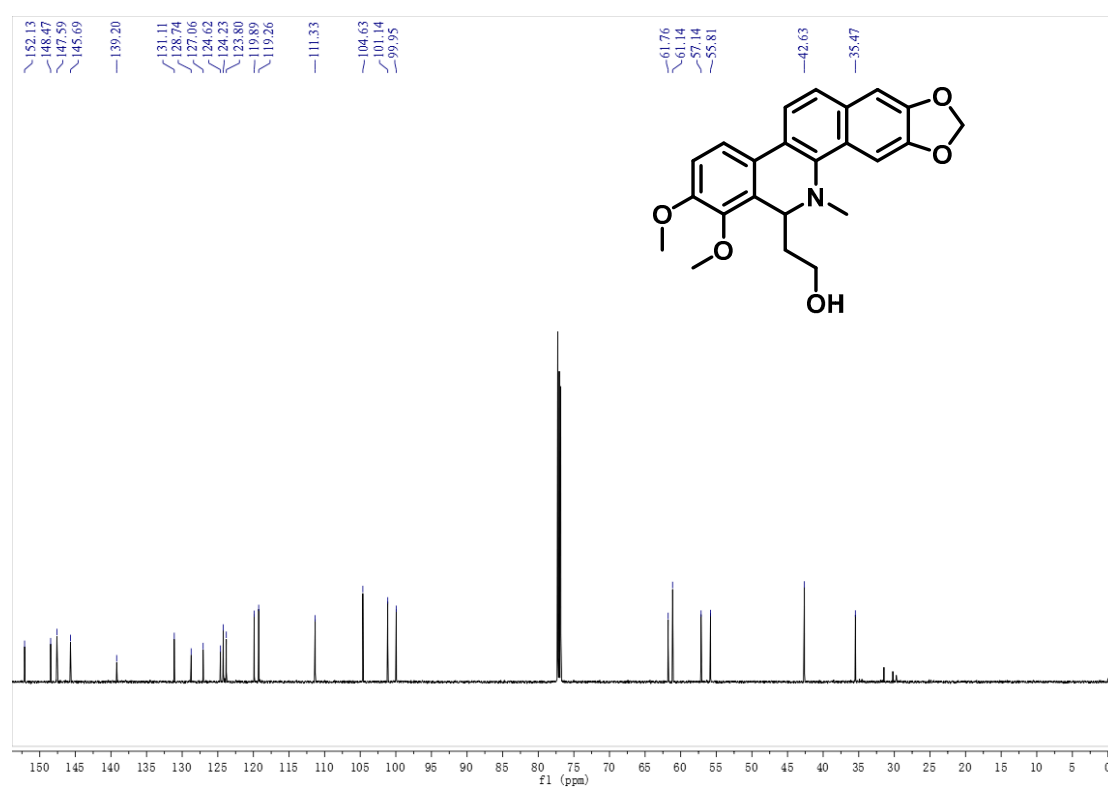

Figure S21.  $^{13}\text{C}$ -NMR spectrum of **1f** (150 MHz,  $\text{CDCl}_3$ ).

B-16 #33 RT: 0.14 AV: 1 NL: 2.21E6  
T: FTMS + p ESI Full ms [100.0000-1500.0000]

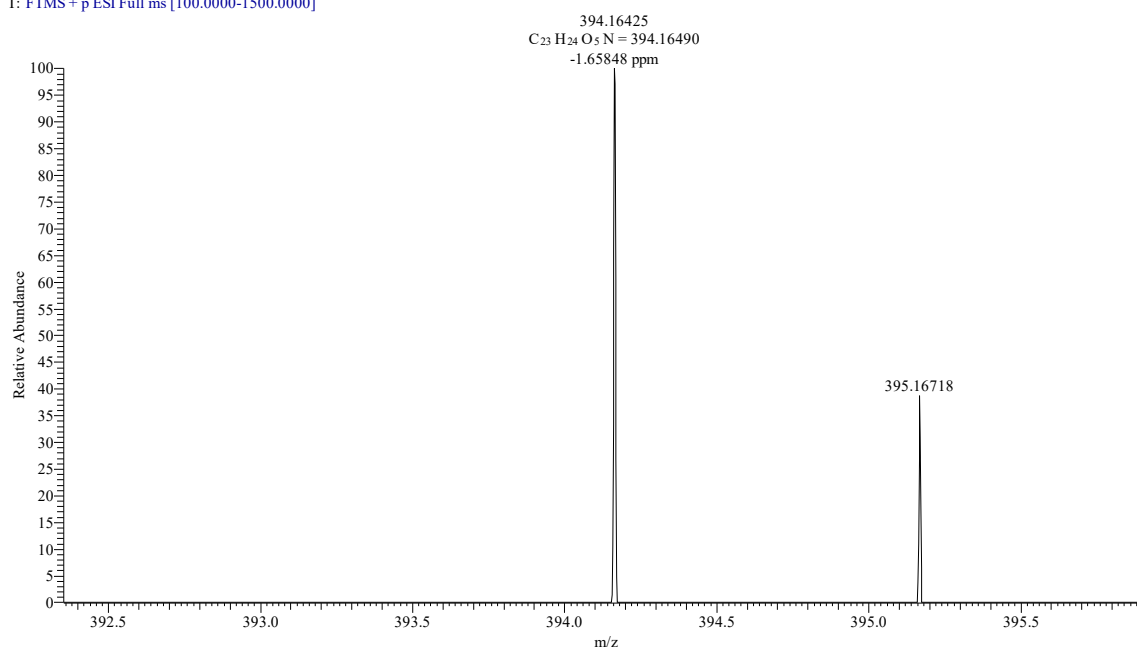

Figure S22. HR-ESI-MS spectrum of **1f**.



Compound **1g**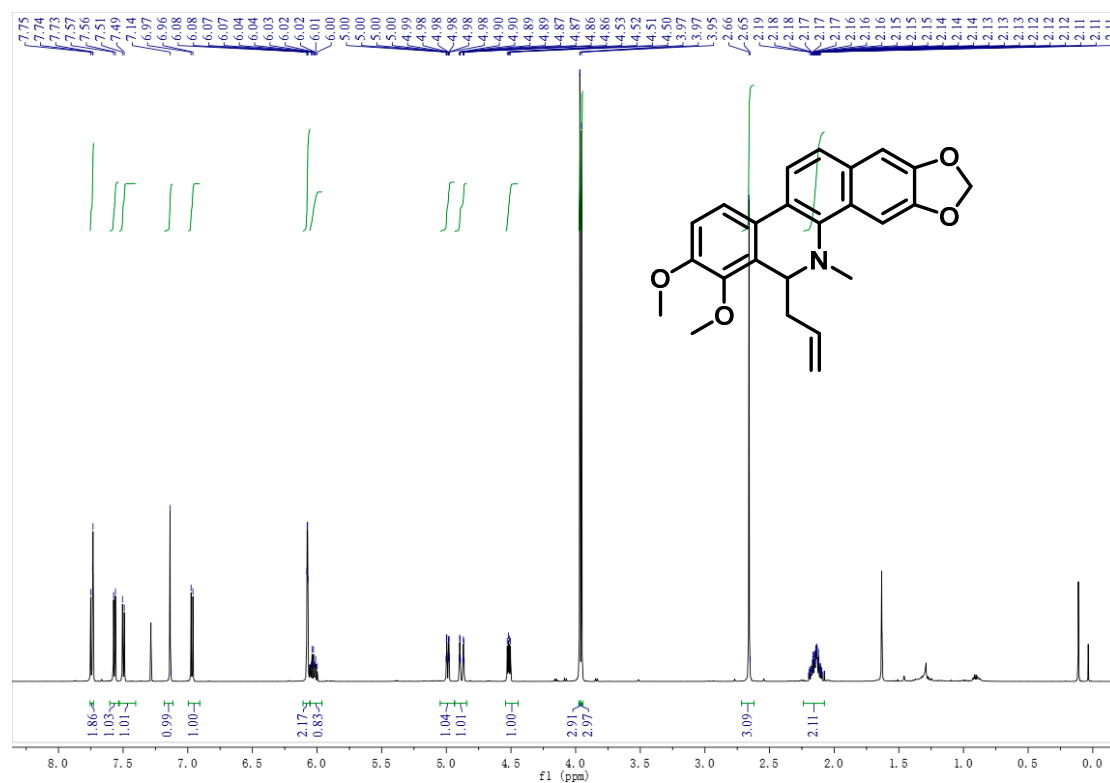Figure S23. <sup>1</sup>H-NMR spectrum of **1g** (600 MHz, CDCl<sub>3</sub>).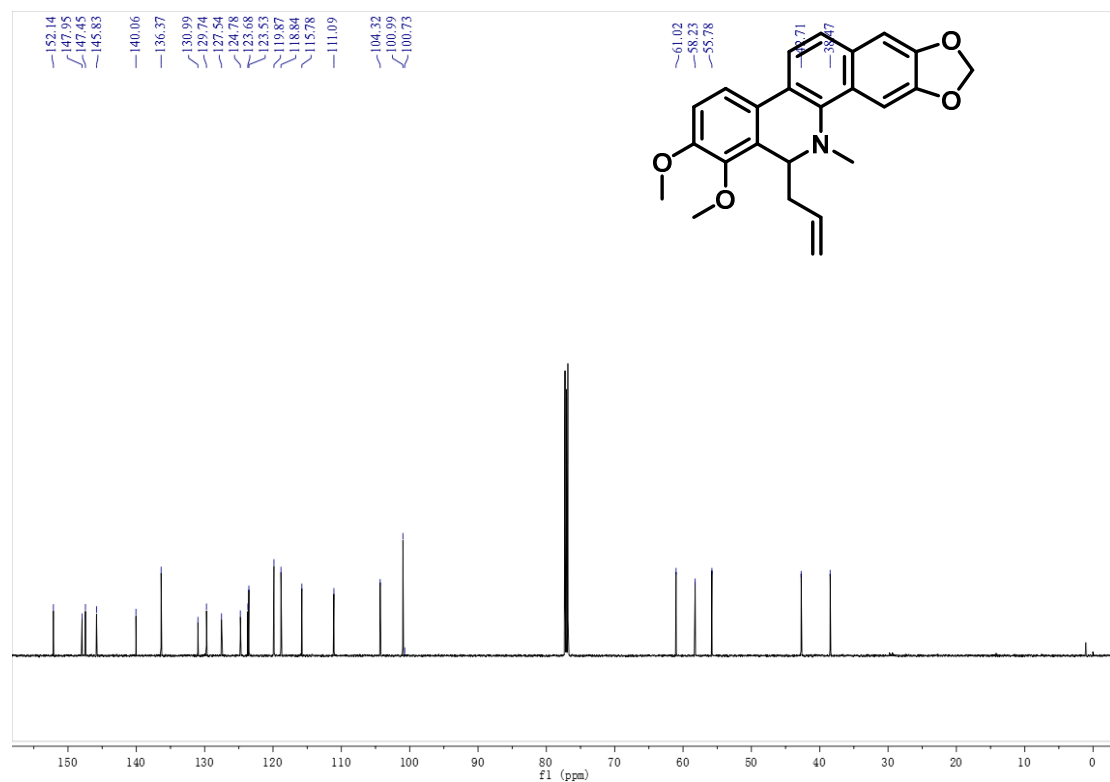Figure S24. <sup>13</sup>C-NMR spectrum of **1g** (150 MHz, CDCl<sub>3</sub>).

B-18 #25 RT: 0.11 AV: 1 NL: 3.28E9  
T: FTMS + p ESI Full ms [100.0000-1500.0000]

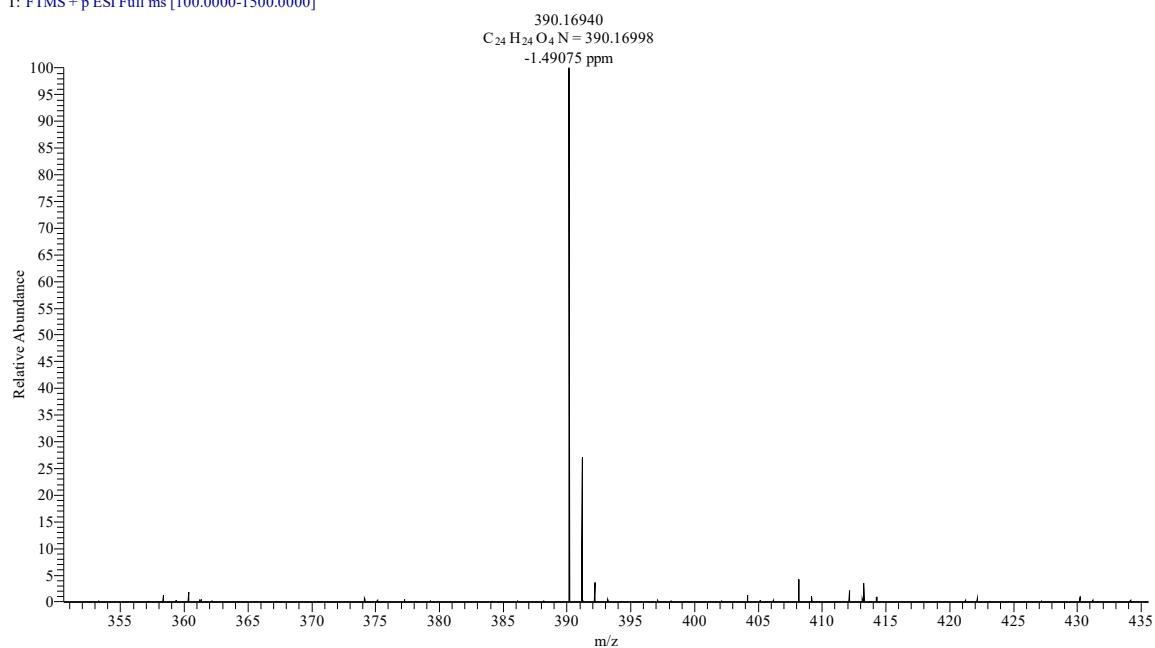

Figure S25. HR-ESI-MS spectrum of **1g**.

## Compound **1h**

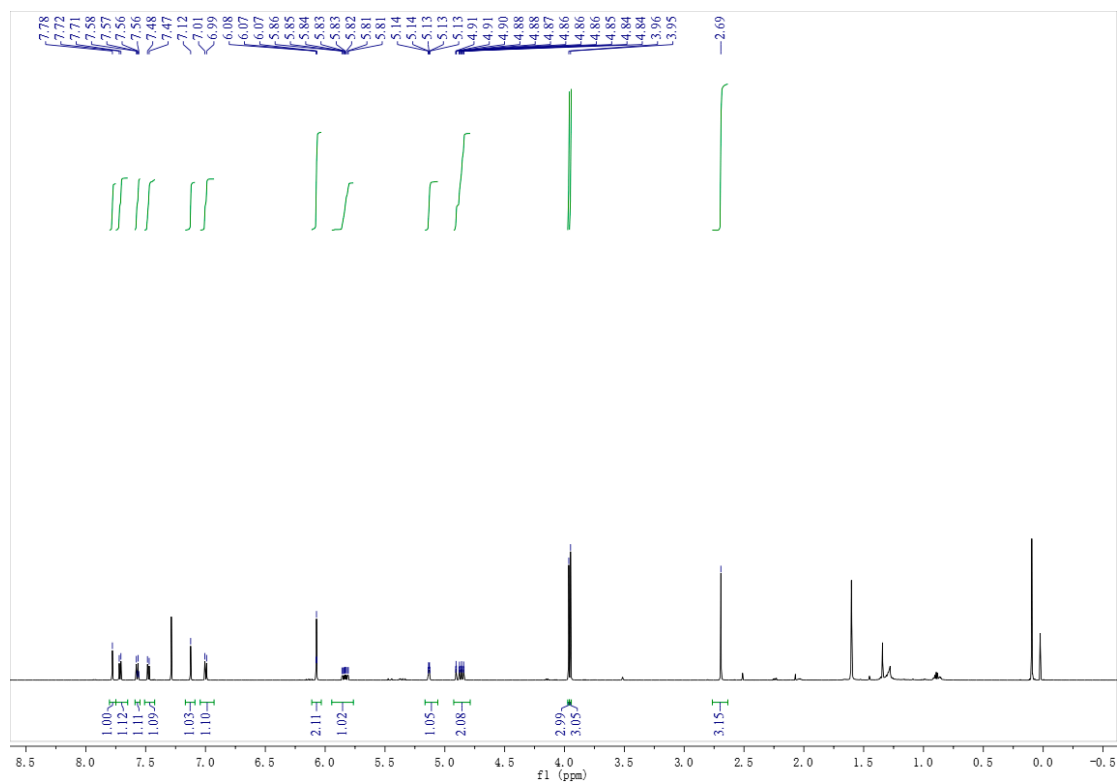

Figure S26.  $^1H$ -NMR spectrum of **1h** (600 MHz,  $CDCl_3$ ).

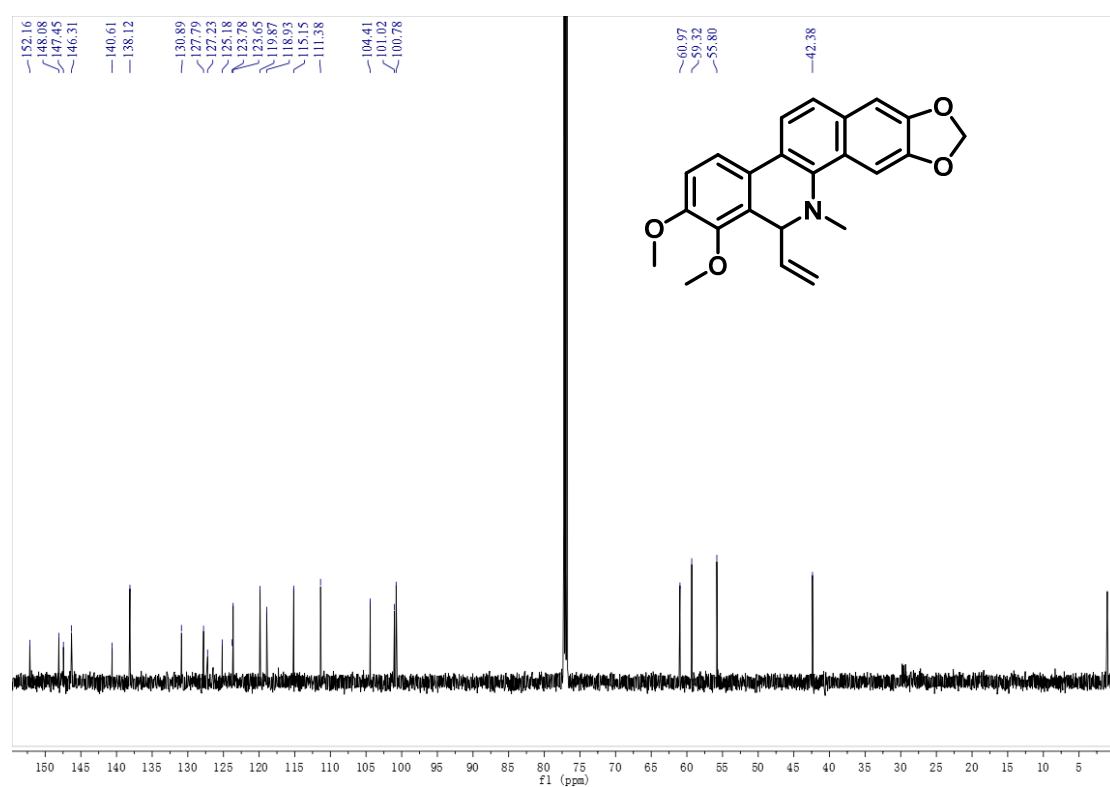

Figure S27. <sup>13</sup>C-NMR spectrum of **1h** (150 MHz, CDCl<sub>3</sub>).

B-20 #24 RT: 0.11 AV: 1 NL: 9.94E8  
T: FTMS + p ESI Full ms [100.0000-1500.0000]

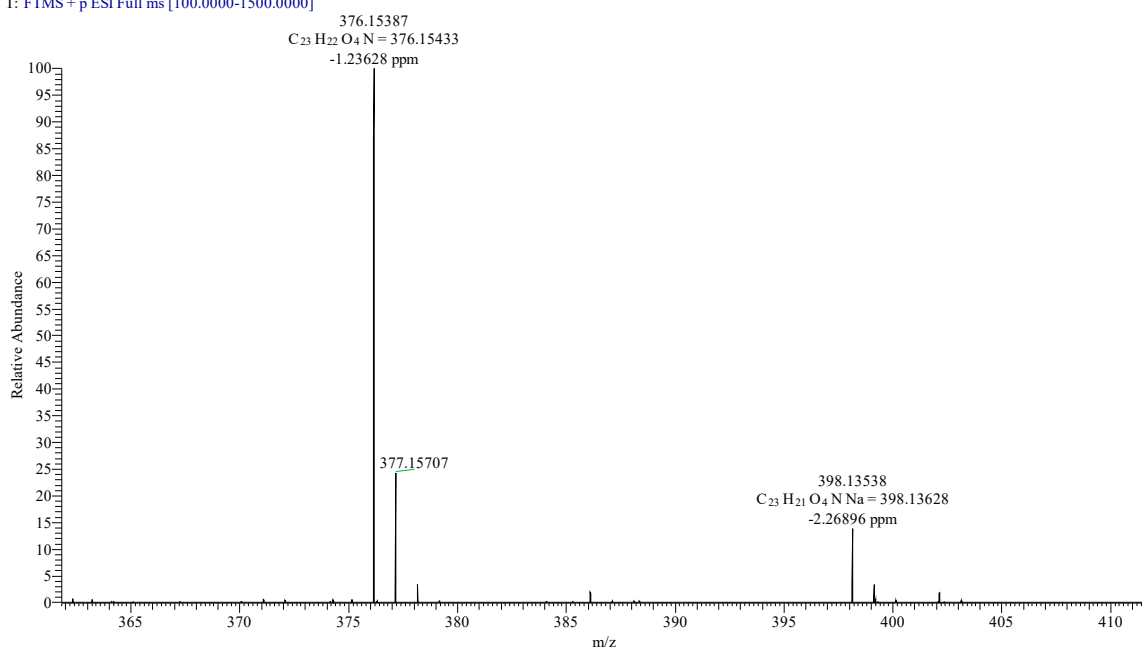

Figure S28. HR-ESI-MS spectrum of **1h**.

Compound **1i**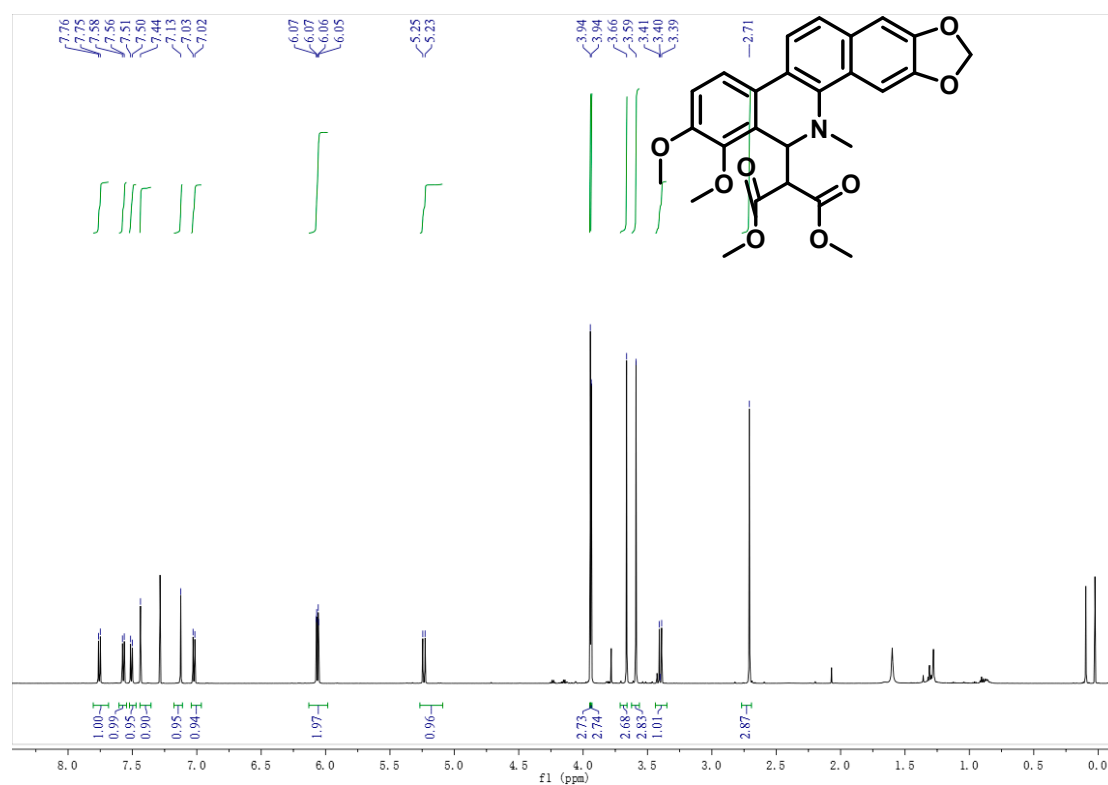Figure S29. <sup>1</sup>H-NMR spectrum of **1i** (600 MHz, CDCl<sub>3</sub>).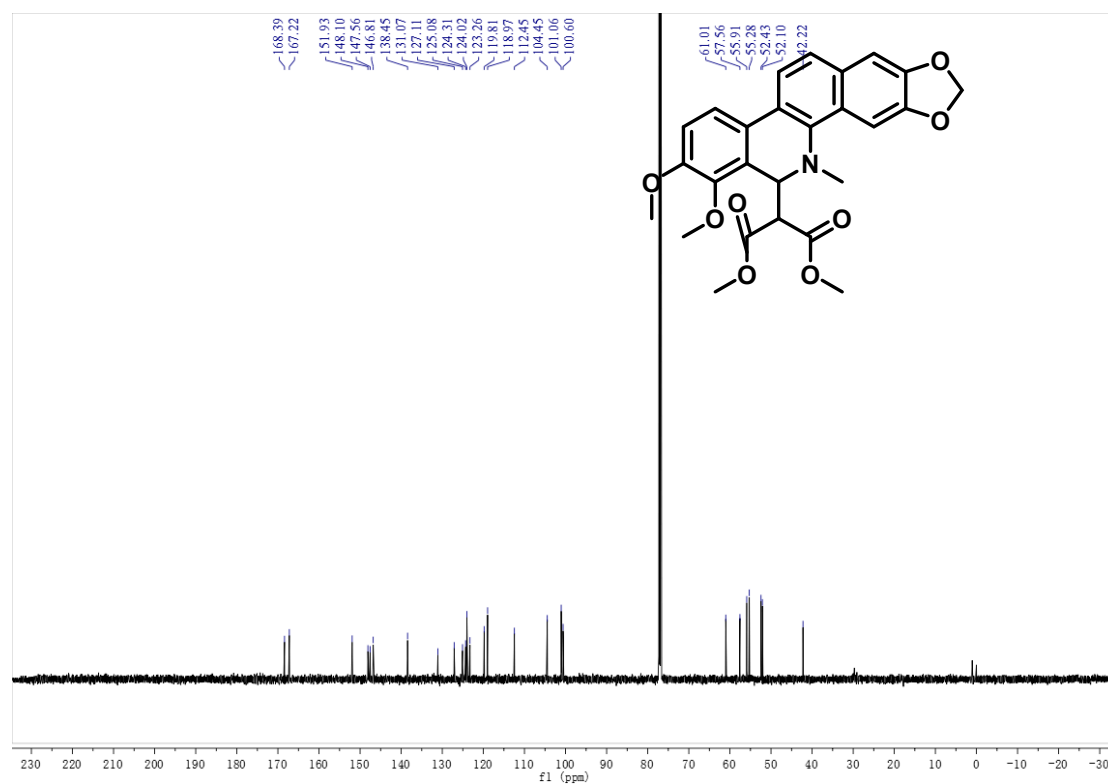Figure S30. <sup>13</sup>C-NMR spectrum of **1i** (150 MHz, CDCl<sub>3</sub>).

B-22 #20 RT: 0.09 AV: 1 NL: 3.55E8  
T: FTMS + p ESI Full ms [100.0000-1500.0000]

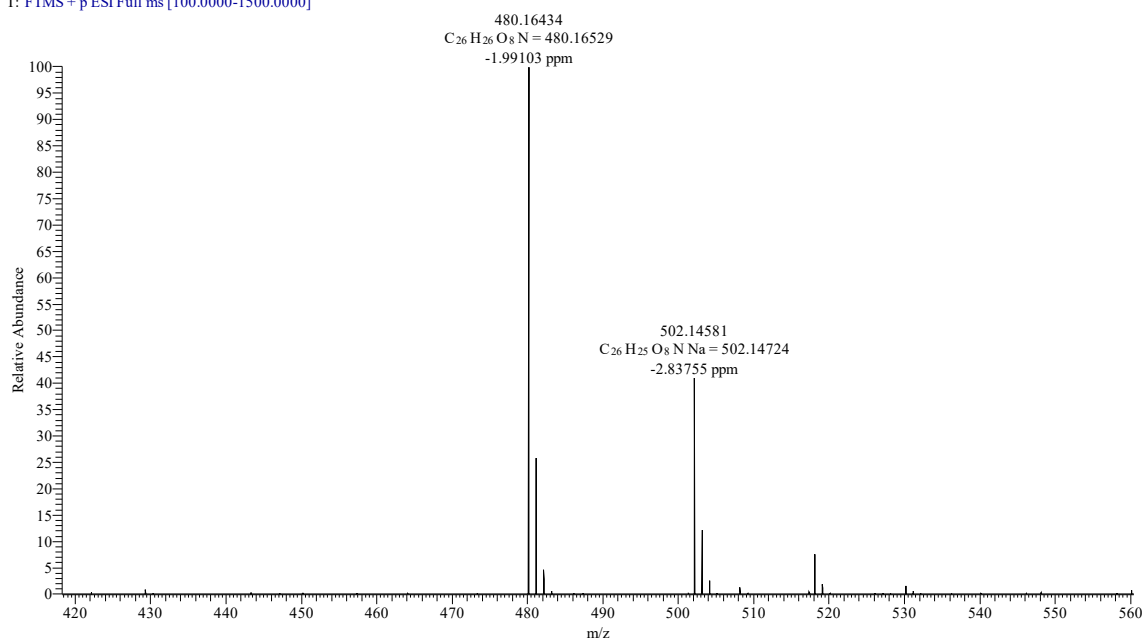

Figure S31. HR-ESI-MS spectrum of **1i**.

### Compound **1j**

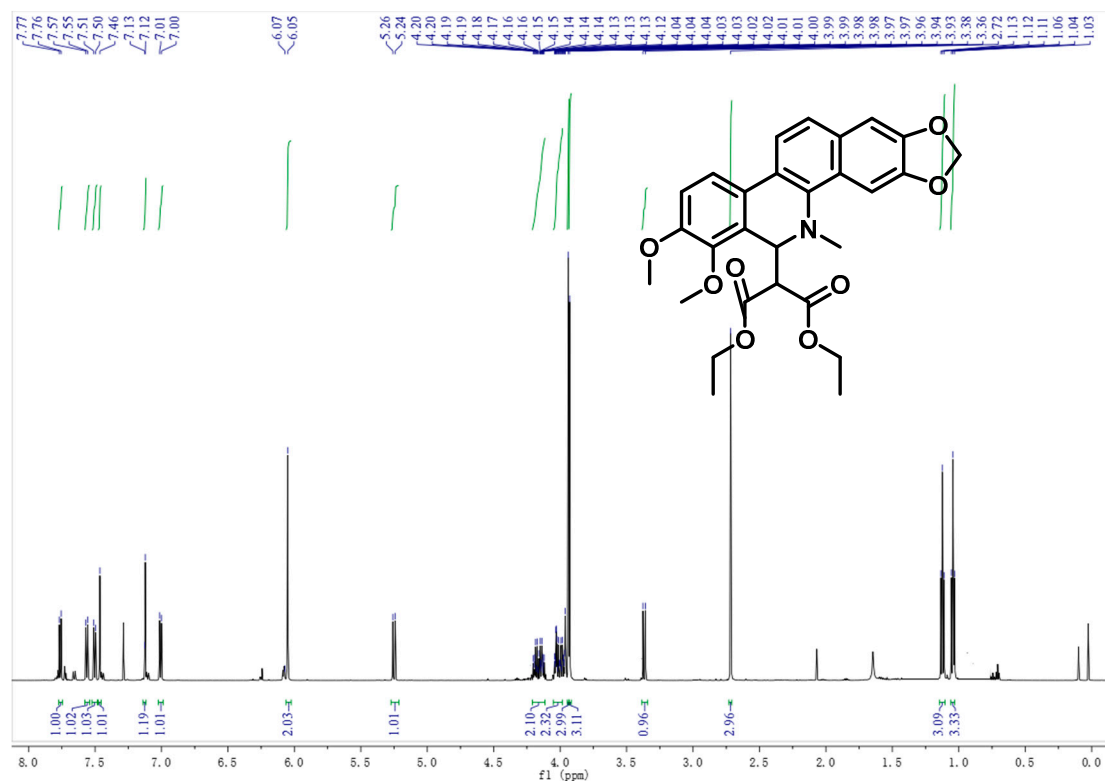

Figure S32.  $^1H$ -NMR spectrum of **1j** (600 MHz,  $CDCl_3$ ).

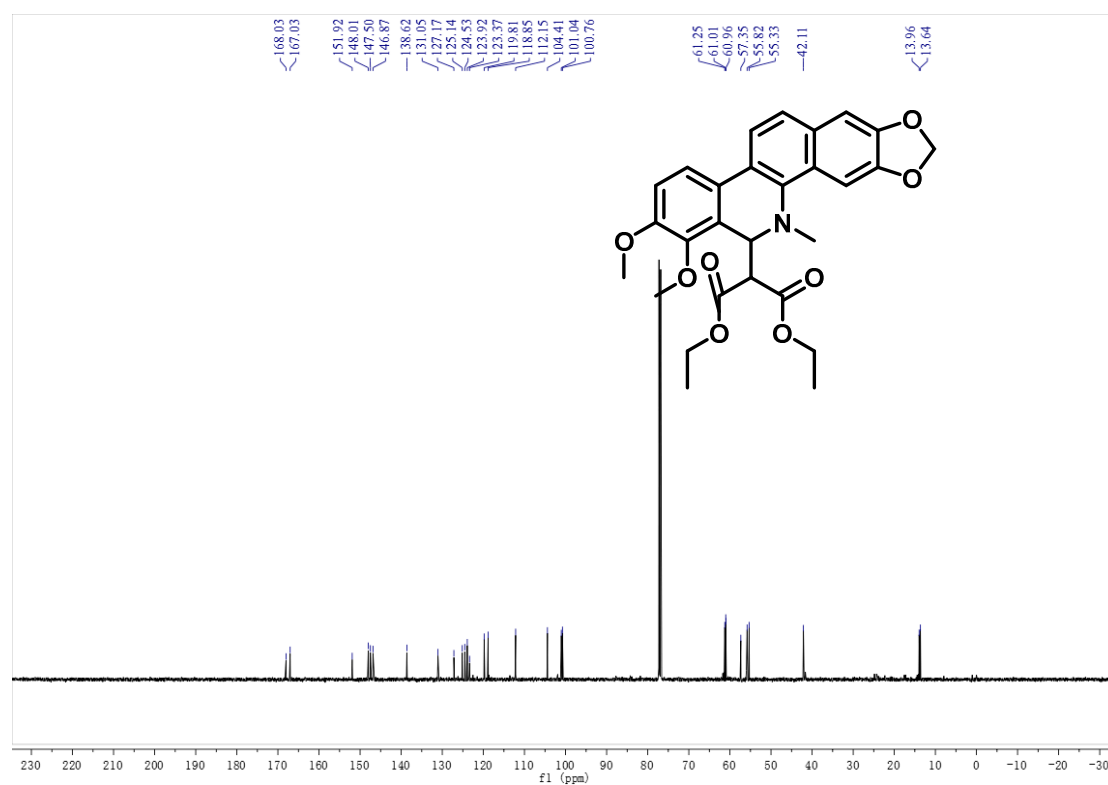

Figure S33.  $^{13}\text{C}$ -NMR spectrum of **1j** (150 MHz,  $\text{CDCl}_3$ ).

B-23 #48 RT: 0.21 AV: 1 NL: 2.74E8  
T: FTMS + p ESI Full ms [100.0000-1500.0000]

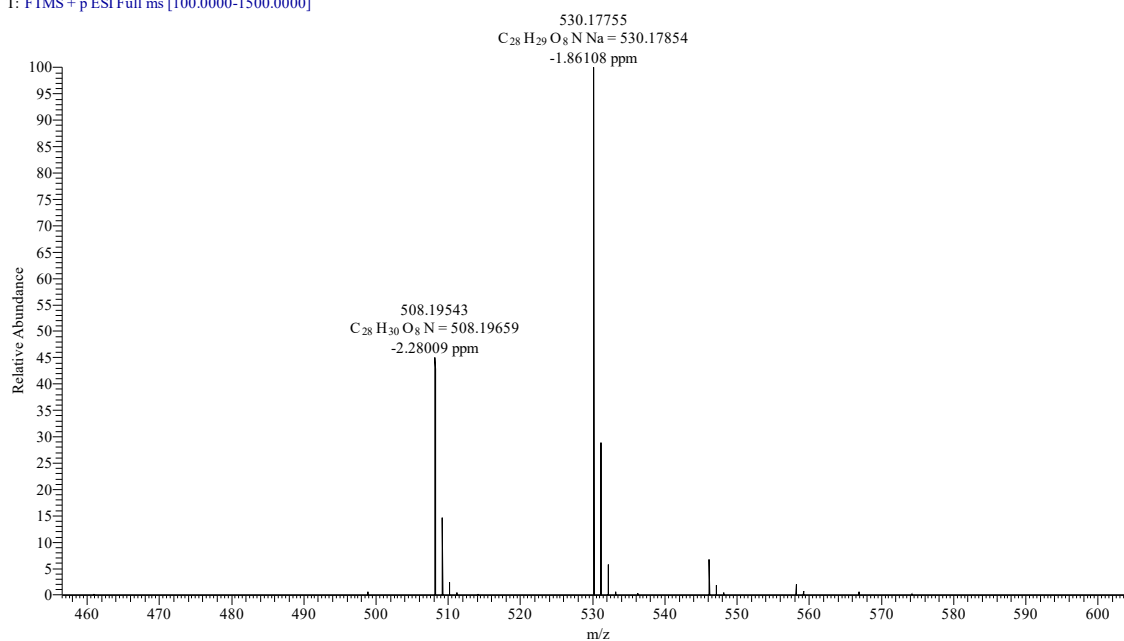

Figure S34. HR-ESI-MS spectrum of **1j**.

## Compound 1k

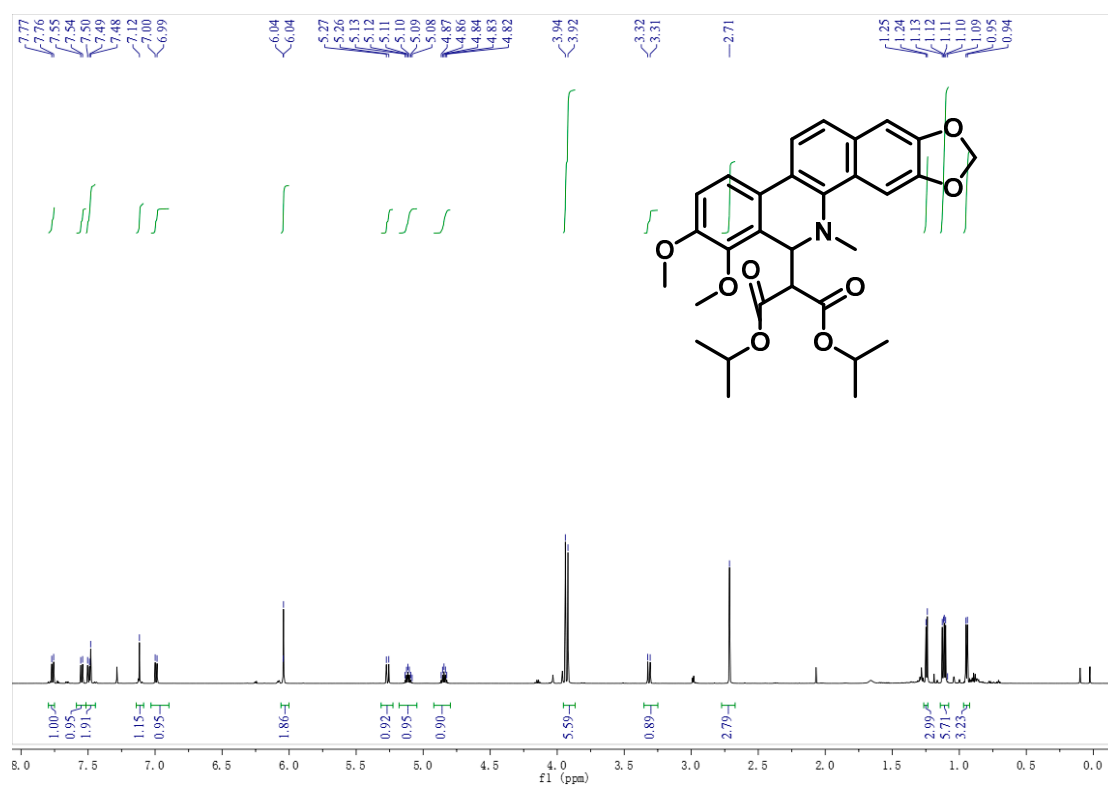Figure S35. <sup>1</sup>H-NMR spectrum of 1k (600 MHz, CDCl<sub>3</sub>).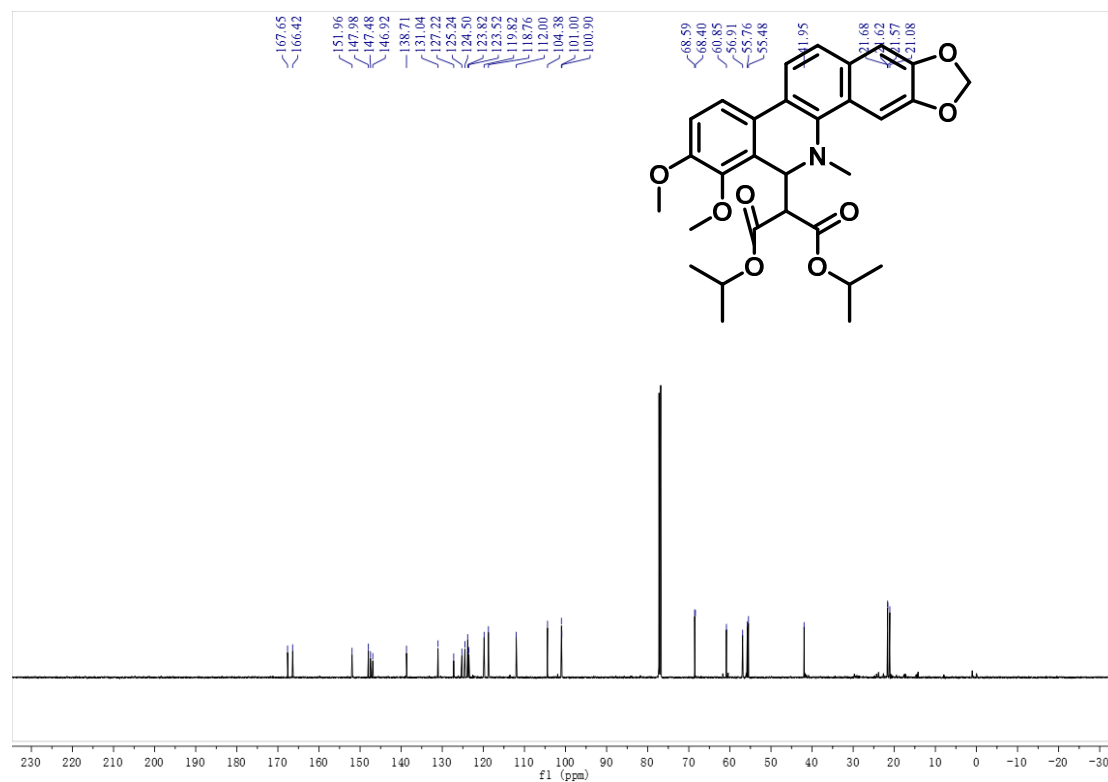Figure S36. <sup>13</sup>C-NMR spectrum of 1k (150 MHz, CDCl<sub>3</sub>).

B-24 #28 RT: 0.12 AV: 1 NL: 4.90E8  
T: FTMS + p ESI Full ms [100.0000-1500.0000]

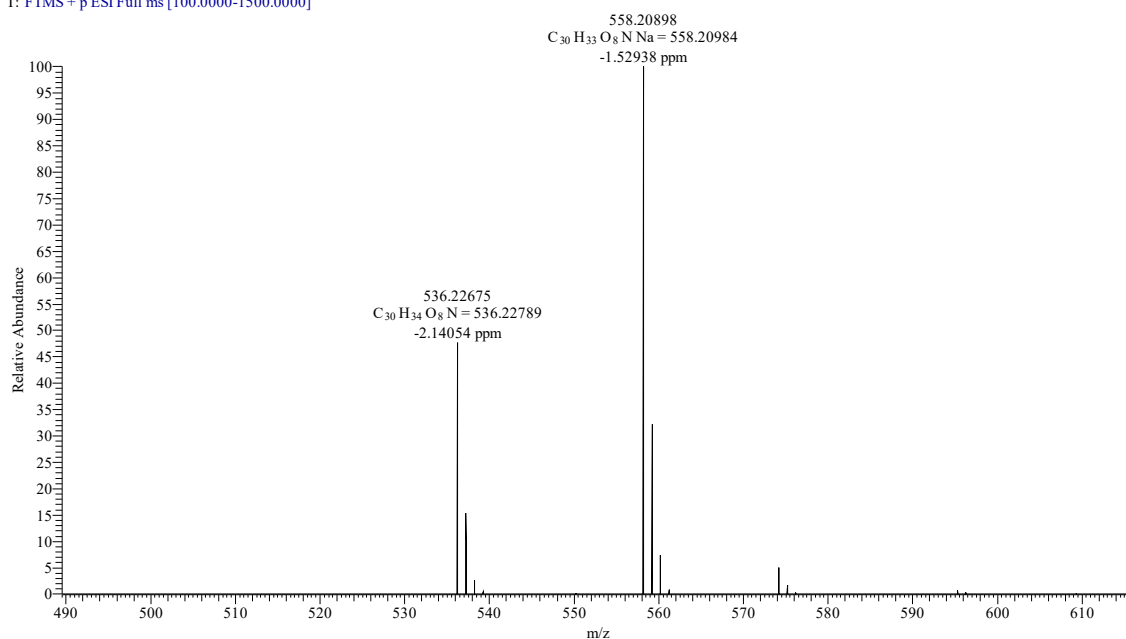

Figure S37. HR-ESI-MS spectrum of 1k.

## Compound 1l

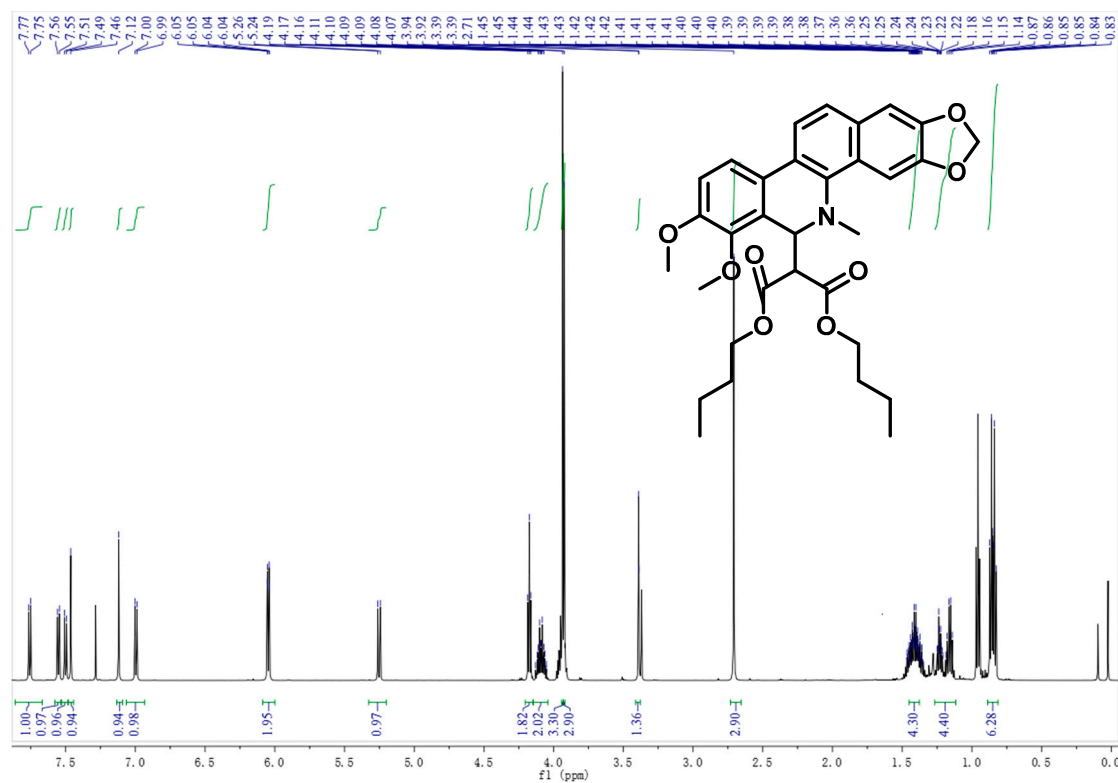

Figure S38.  $^1H$ -NMR spectrum of 1l (600 MHz,  $CDCl_3$ ).



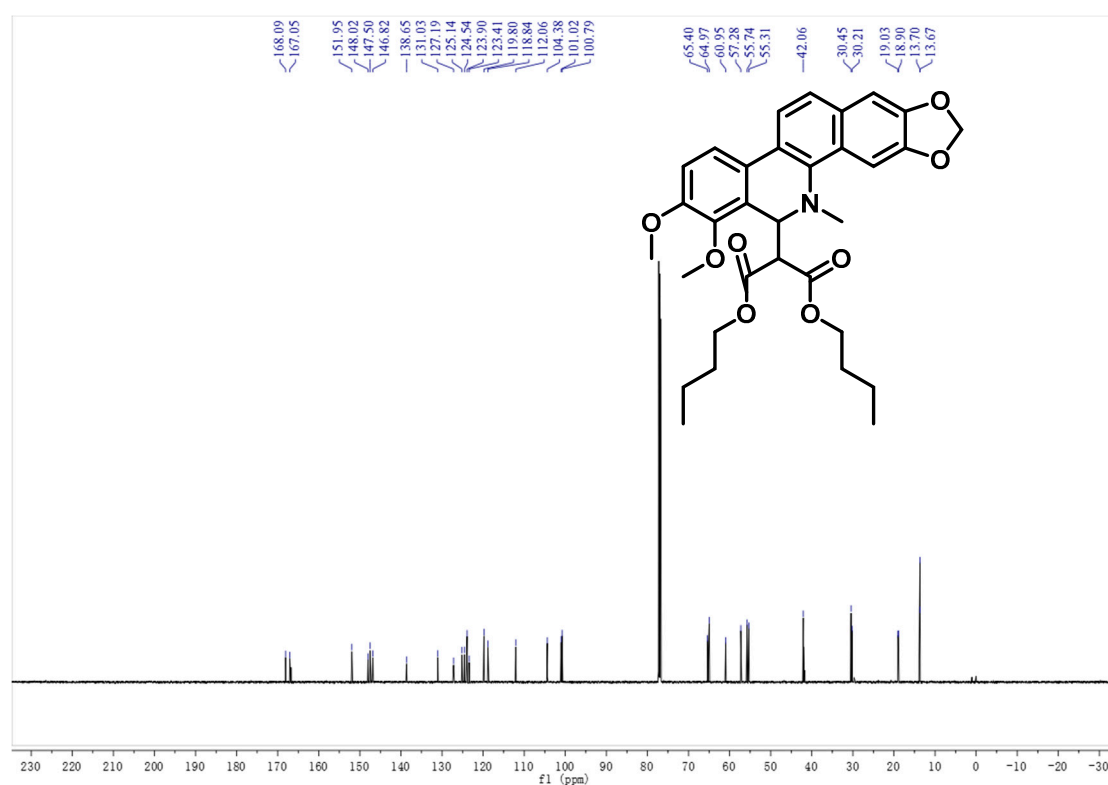

Figure S39.  $^{13}\text{C}$ -NMR spectrum of **11** (150 MHz,  $\text{CDCl}_3$ ).

B-21 #31 RT: 0.14 AV: 1 NL: 6.94E8  
T: FTMS + p ESI Full ms [100.0000-1500.0000]

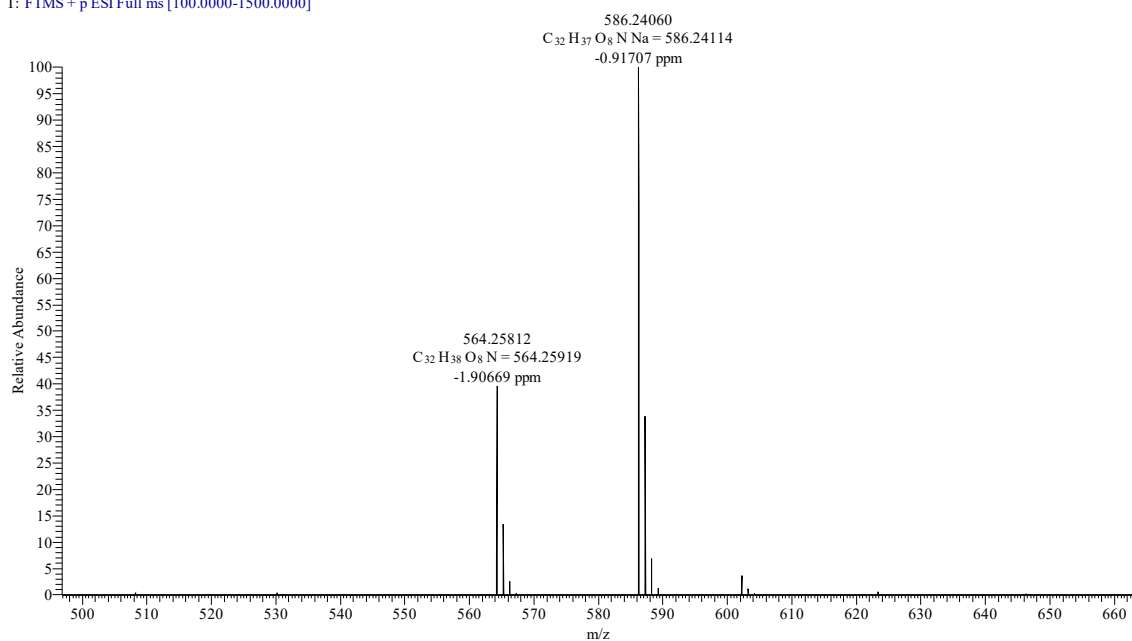

Figure S40. HR-ESI-MS spectrum of **11**.

Compound **1m**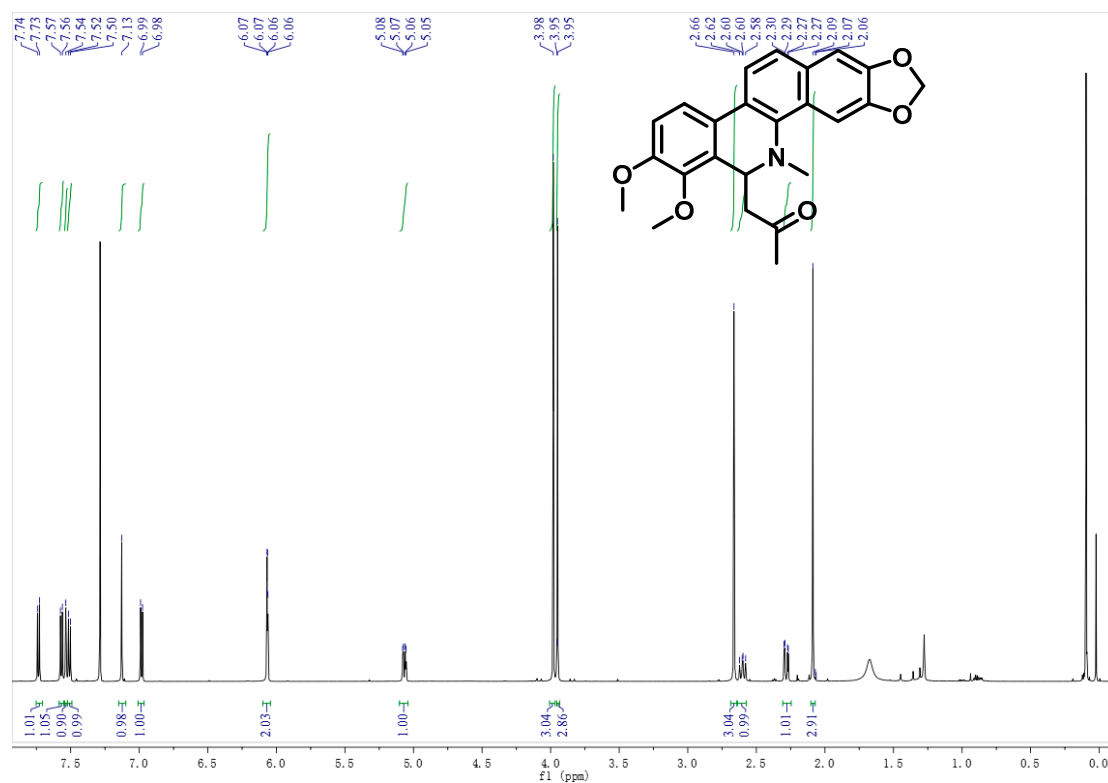Figure S41. <sup>1</sup>H-NMR spectrum of **1m** (600 MHz, CDCl<sub>3</sub>).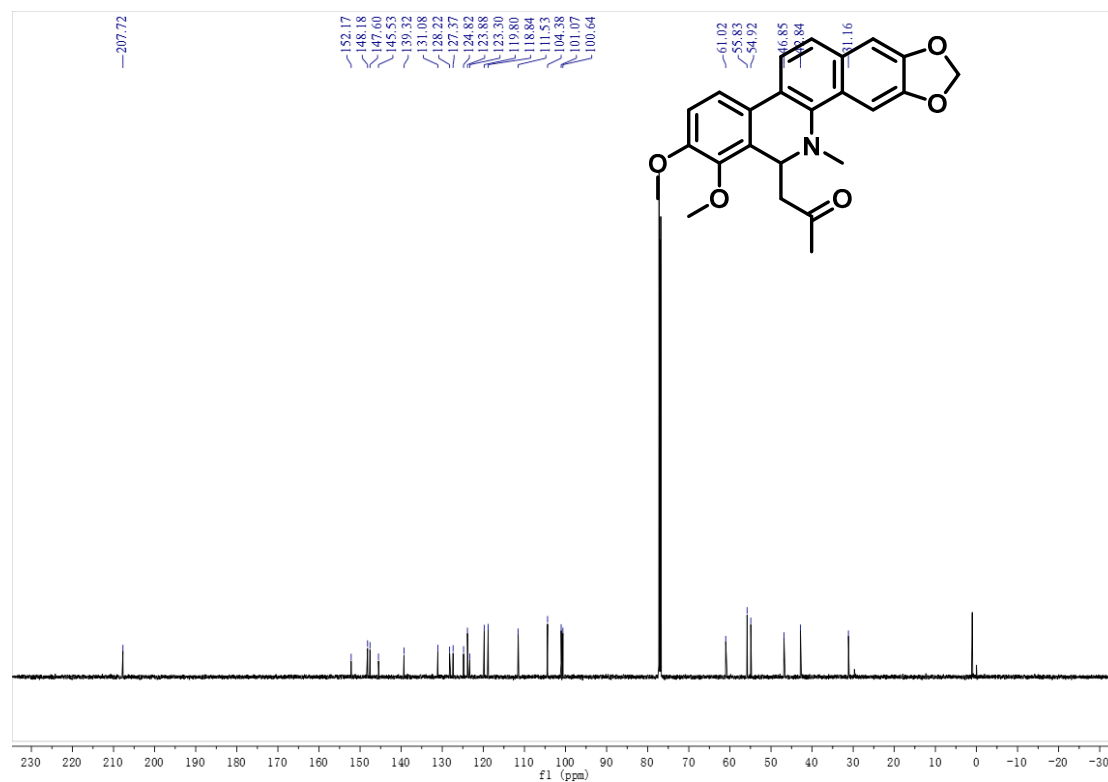Figure S42. <sup>13</sup>C-NMR spectrum of **1m** (150 MHz, CDCl<sub>3</sub>).

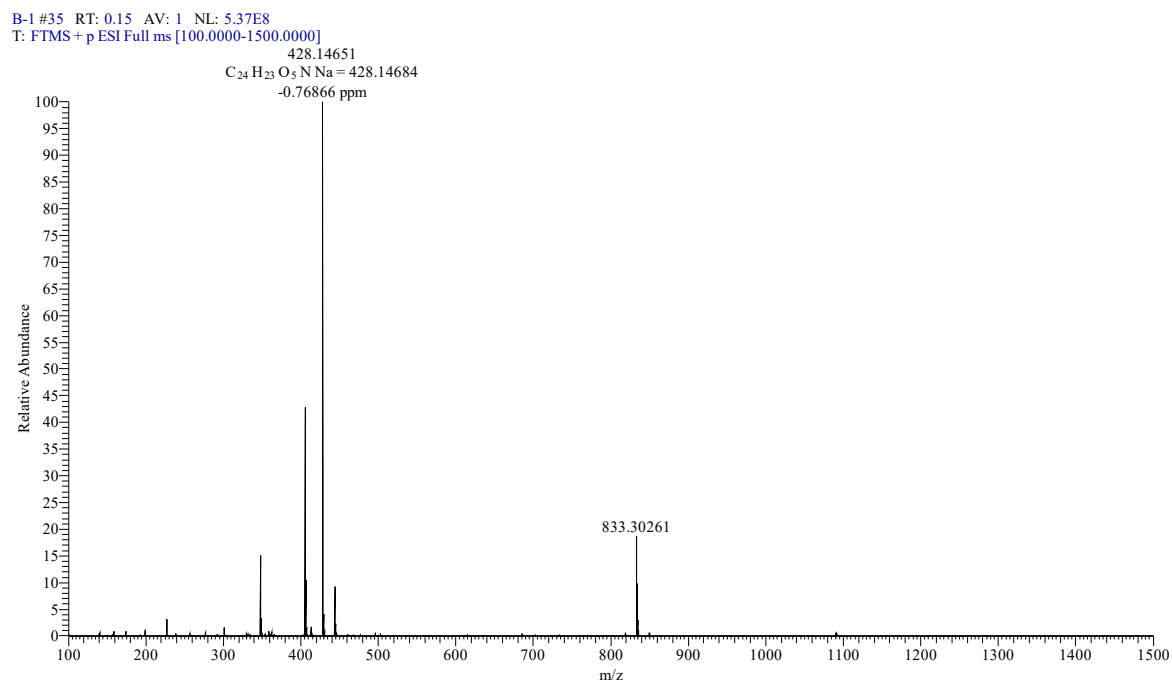Figure S43. HR-ESI-MS spectrum of **1m**.Compound **1n**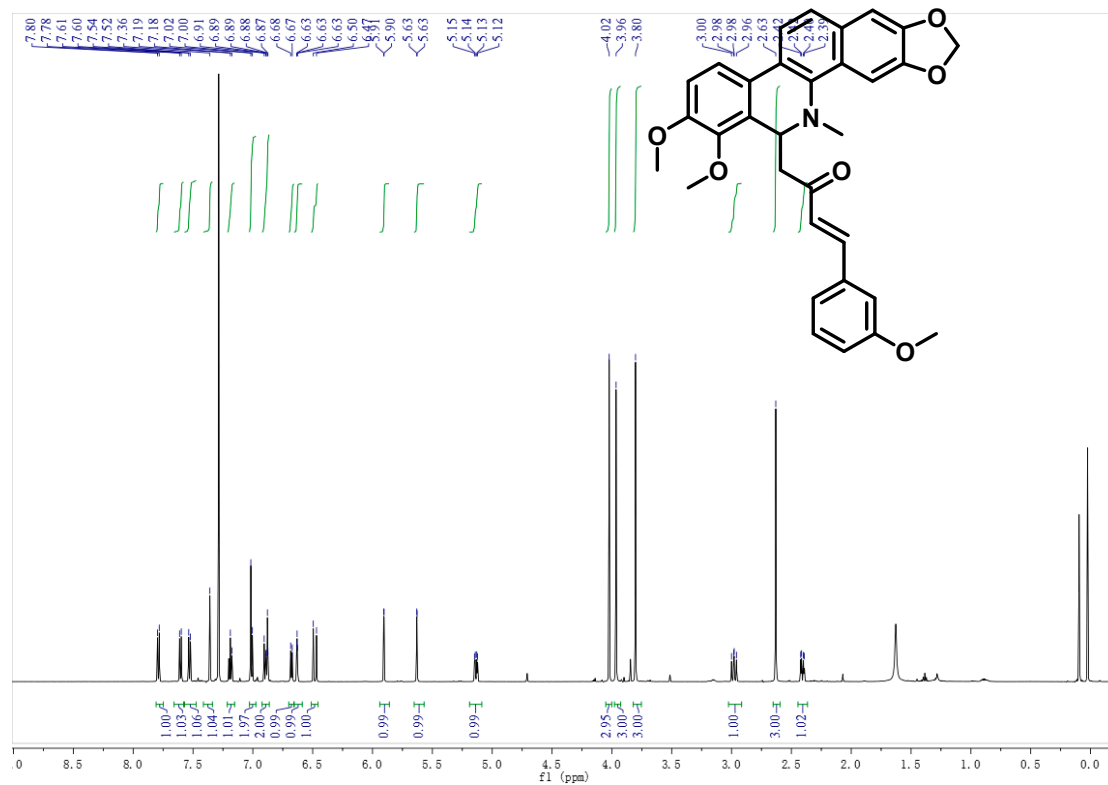Figure S44.  $^1\text{H}$ -NMR spectrum of **1n** (600 MHz,  $\text{CDCl}_3$ ).

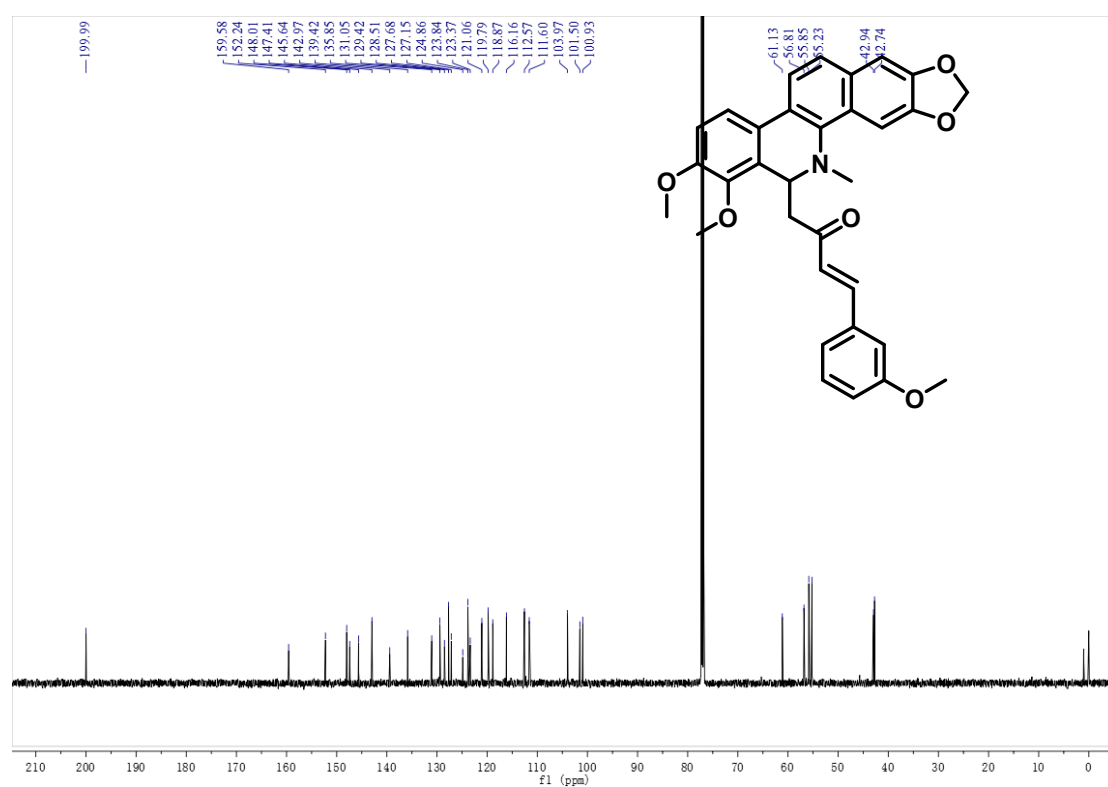

Figure S45.  $^{13}\text{C}$ -NMR spectrum of **1n** (150 MHz,  $\text{CDCl}_3$ ).

B-6a #48 RT: 0.21 AV: 1 NL: 5.08E7  
T: FTMS + p ESI Full ms [100.0000-1500.0000]

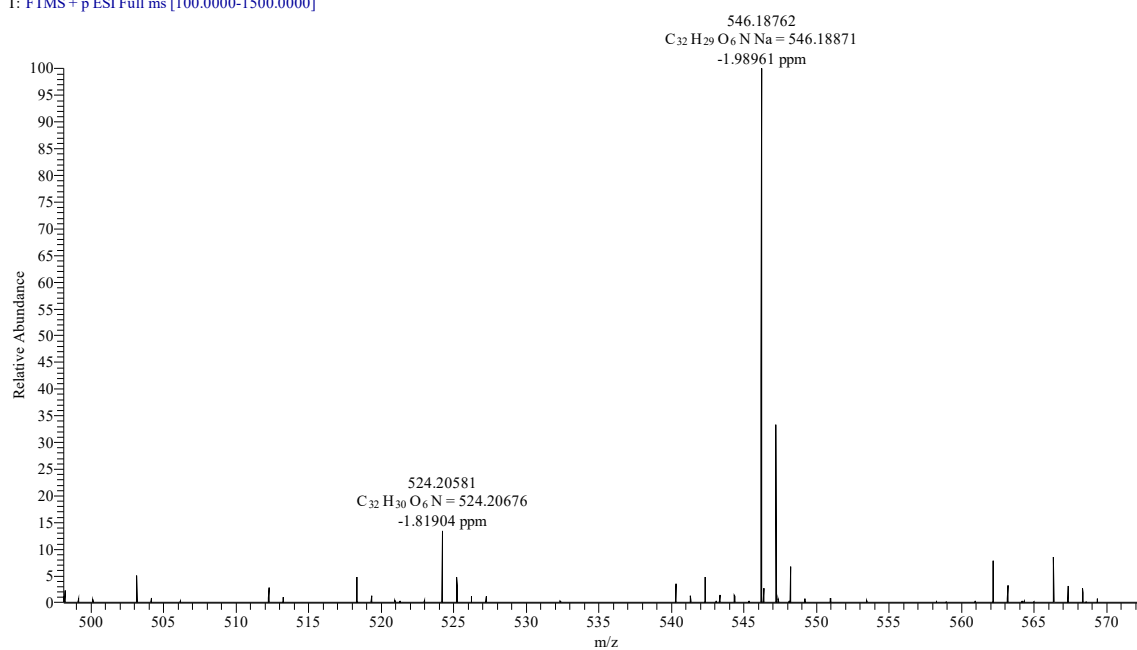

Figure S46. HR-ESI-MS spectrum of **1n**.

Compound **1o**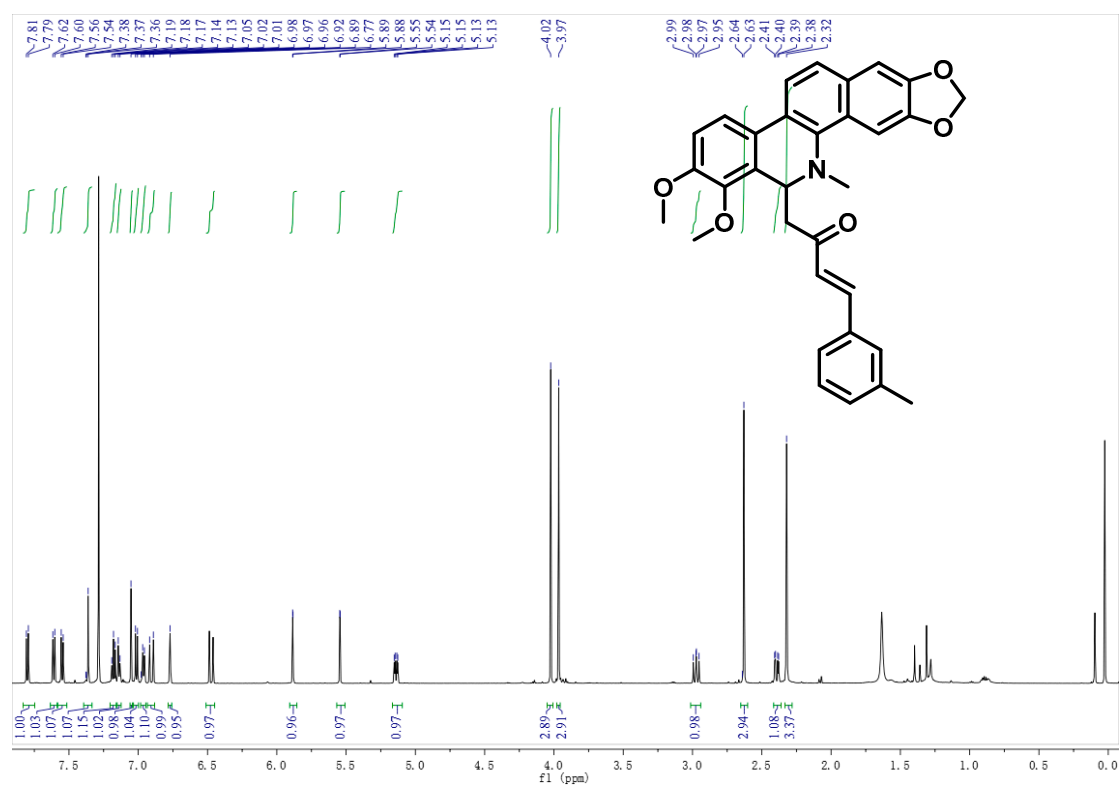Figure S47. <sup>1</sup>H-NMR spectrum of **1o** (600 MHz, CDCl<sub>3</sub>).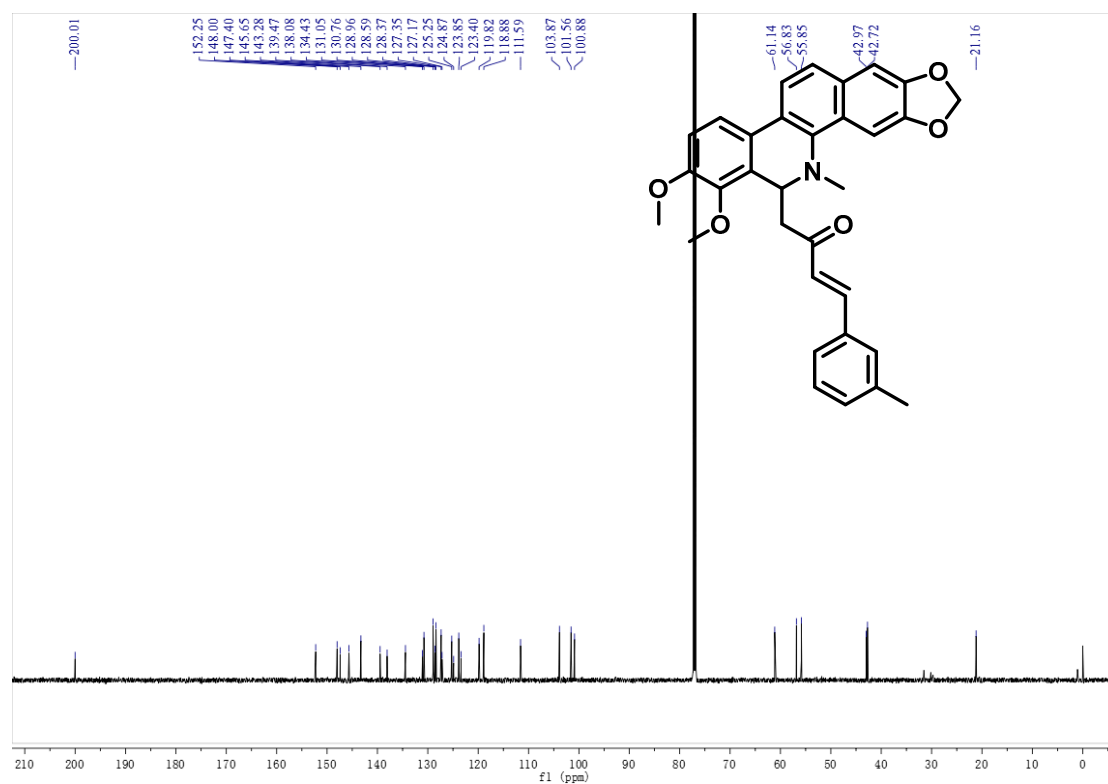Figure S48. <sup>13</sup>C-NMR spectrum of **1o** (150 MHz, CDCl<sub>3</sub>).

B-6b #23 RT: 0.10 AV: 1 NL: 1.90E6  
T: FTMS + p ESI Full ms [100.0000-1500.0000]

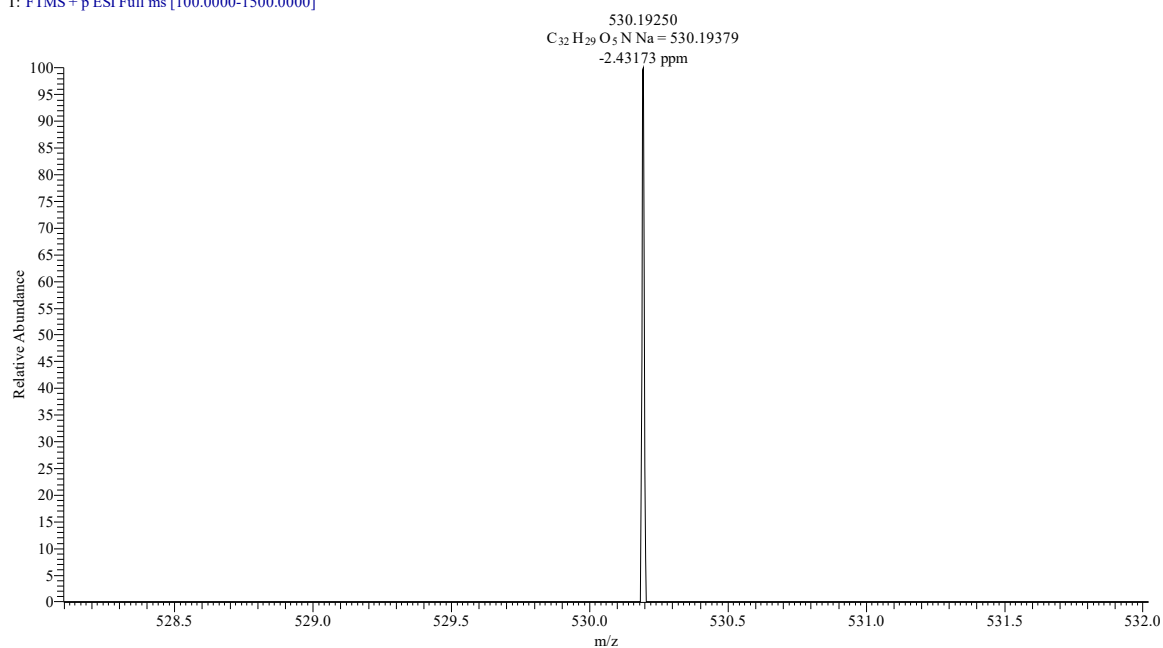

Figure S49. HR-ESI-MS spectrum of **1o**.

### Compound **1p**

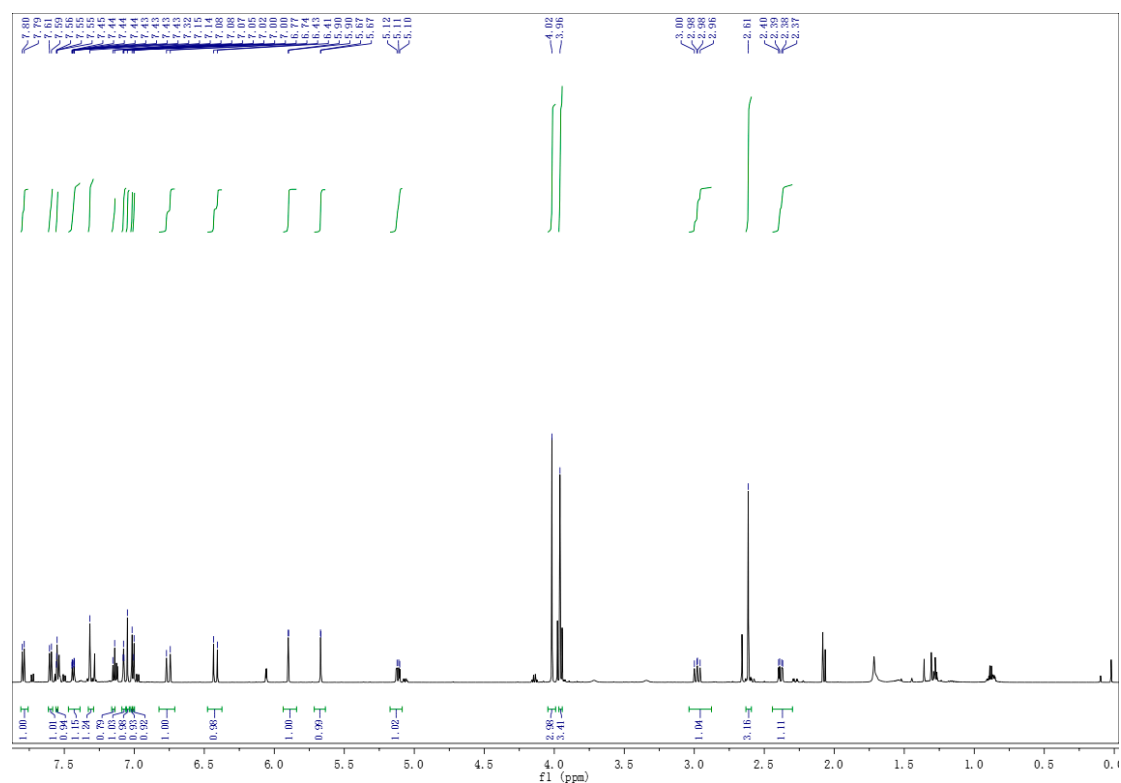

Figure S50.  $^1H$ -NMR spectrum of **1p** (600 MHz,  $CDCl_3$ ).

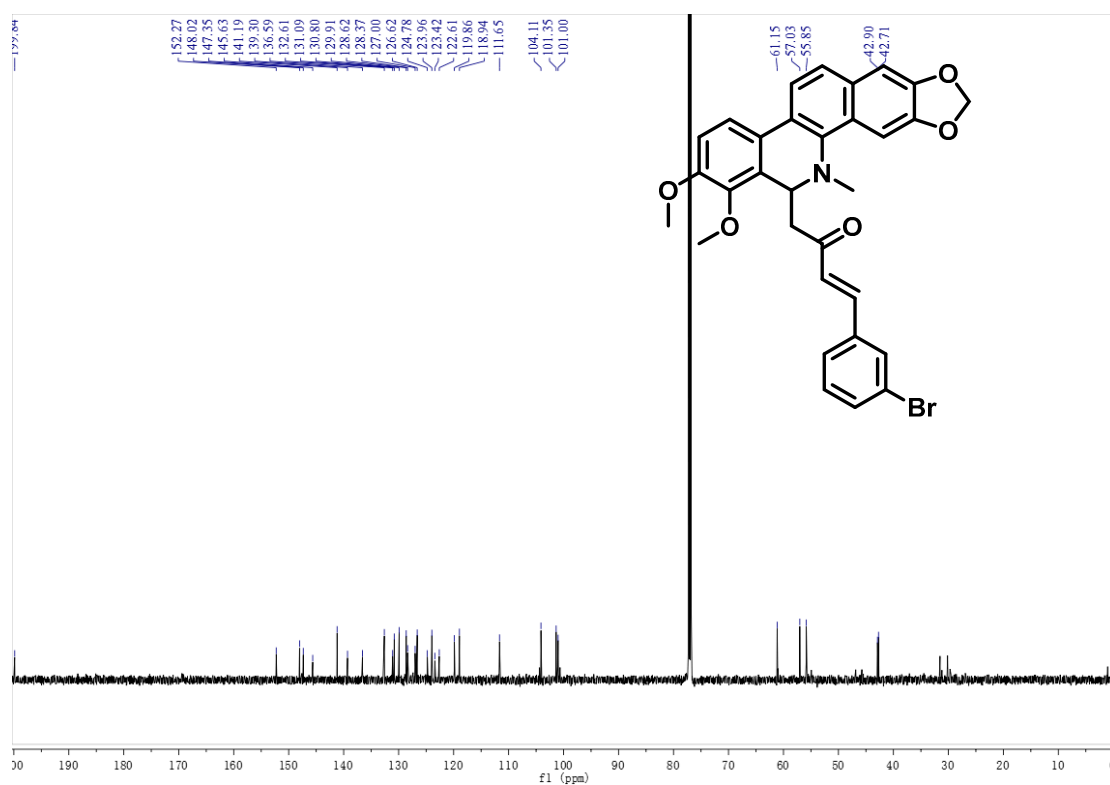

Figure S51. <sup>13</sup>C-NMR spectrum of **1p** (150 MHz, CDCl<sub>3</sub>).

B-6c #23 RT: 0.10 AV: 1 NL: 1.07E6  
T: FTMS + p ESI Full ms [100.0000-1500.0000]

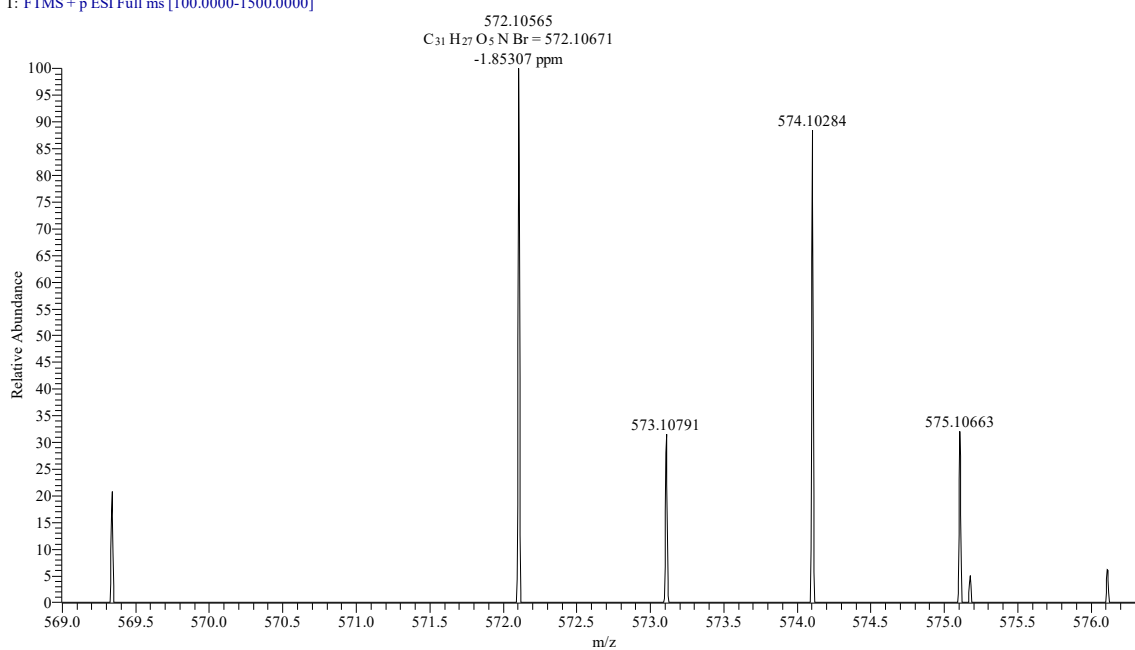

Figure S52. HR-ESI-MS spectrum of **1p**.

Compound **1q**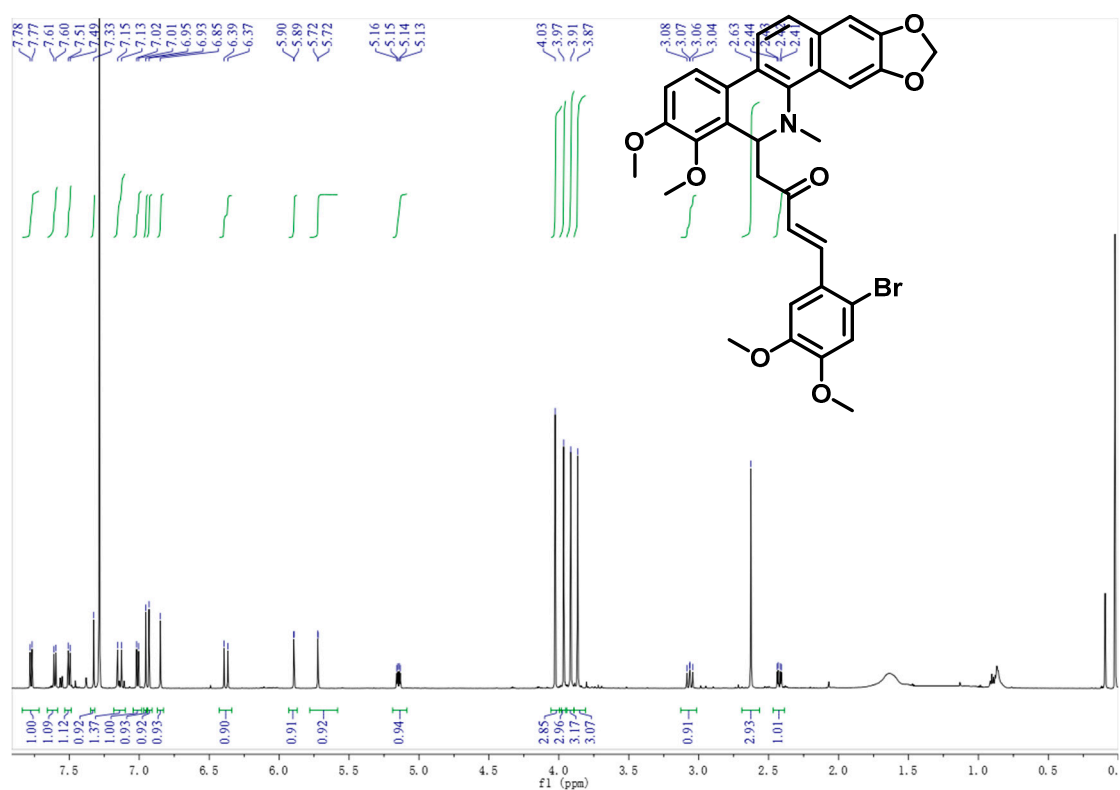Figure S53. <sup>1</sup>H-NMR spectrum of **1q** (600 MHz, CDCl<sub>3</sub>).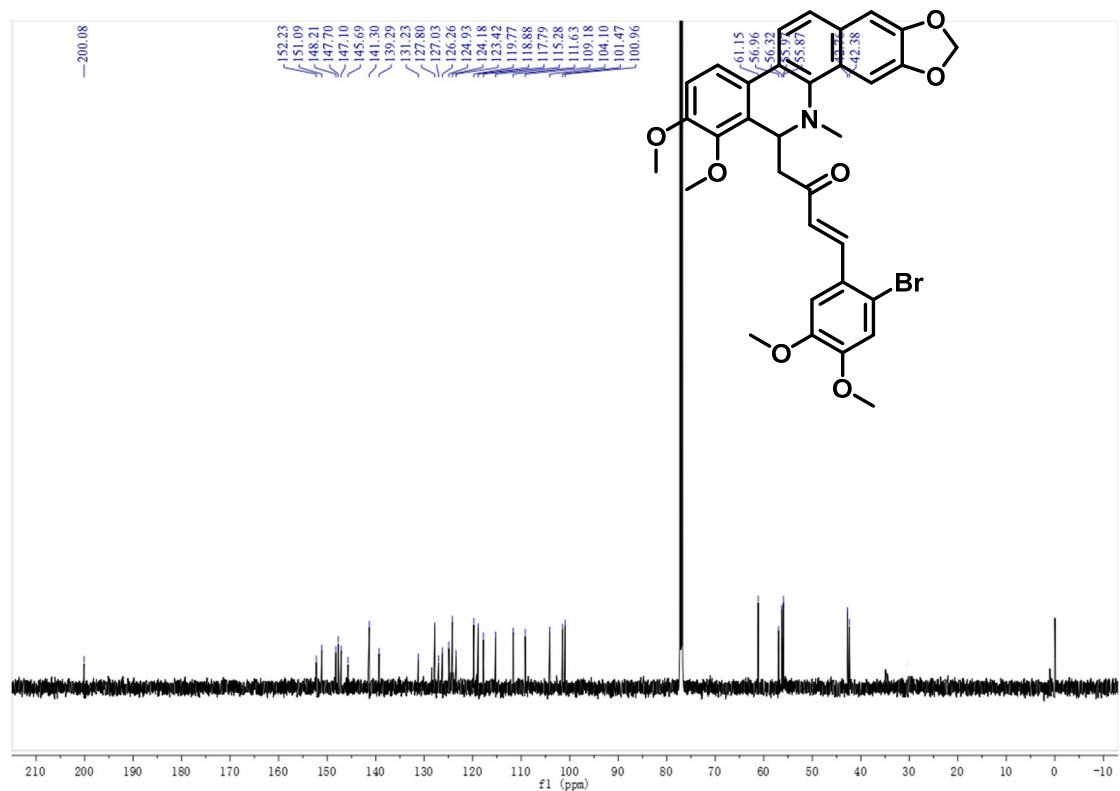Figure S54. <sup>13</sup>C-NMR spectrum of **1q** (150 MHz, CDCl<sub>3</sub>).



B-6d #19 RT: 0.08 AV: 1 NL: 5.31E7  
T: FTMS + p ESI Full ms [100.0000-1500.0000]

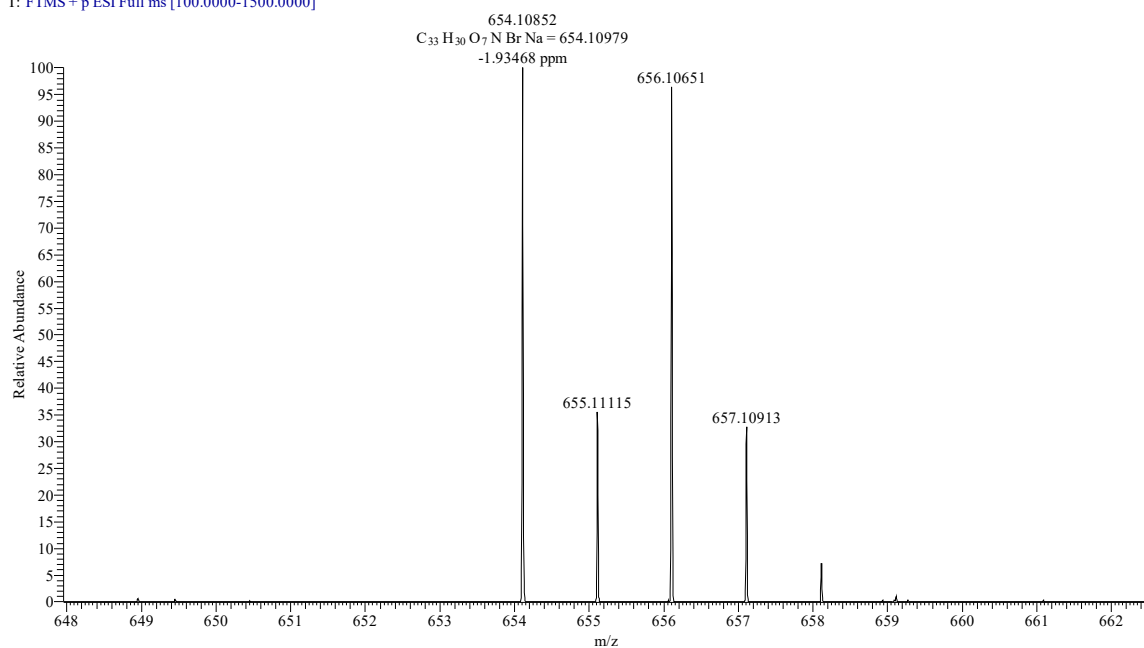

Figure S55. HR-ESI-MS spectrum of **1q**.

### Compound **1r**

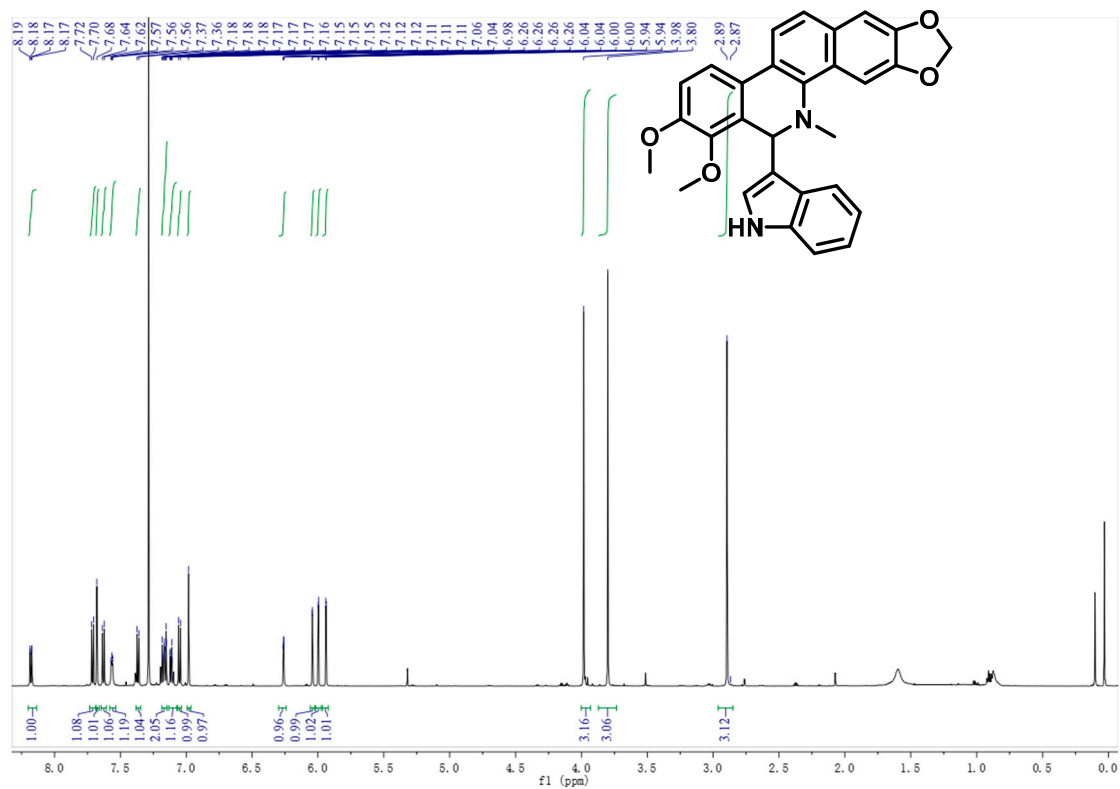

Figure S56.  $^1H$ -NMR spectrum of **1r** (600 MHz,  $CDCl_3$ ).

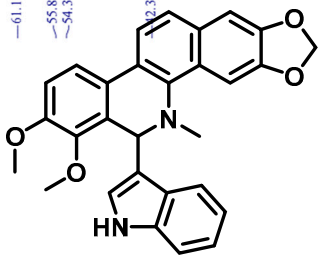

**Figure S57.**  $^{13}\text{C}$ -NMR spectrum of **1r** (150 MHz,  $\text{CDCl}_3$ ).

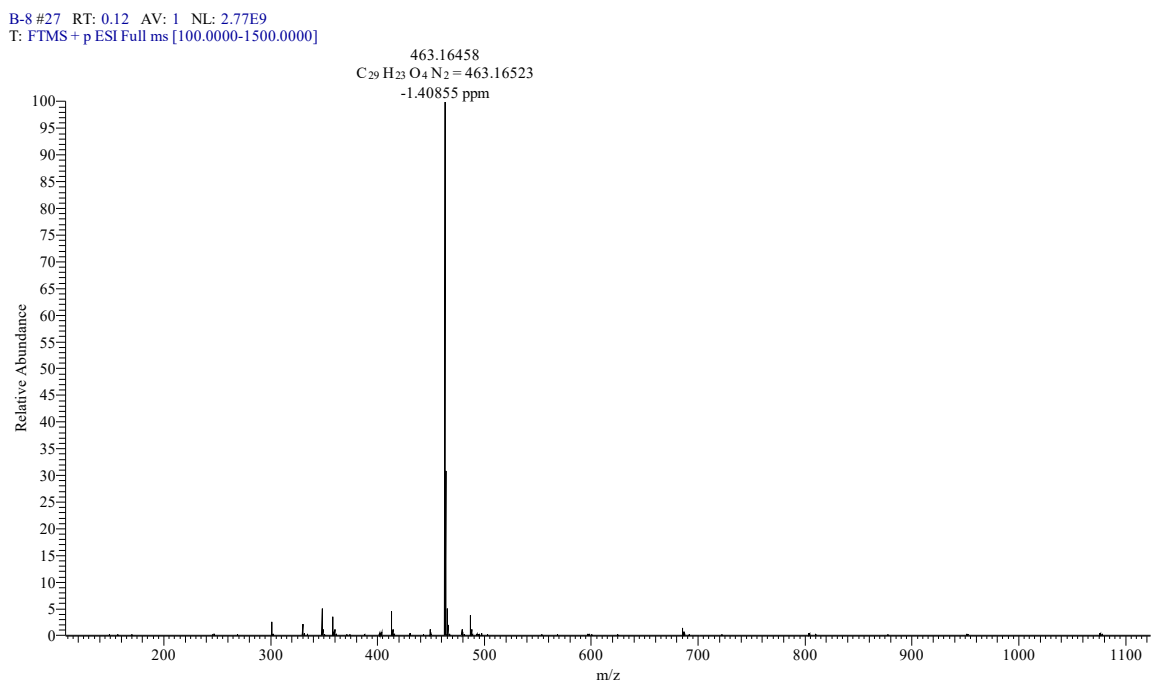

**Figure S58.** HR-ESI-MS spectrum of **1r**.

## Compound 1s

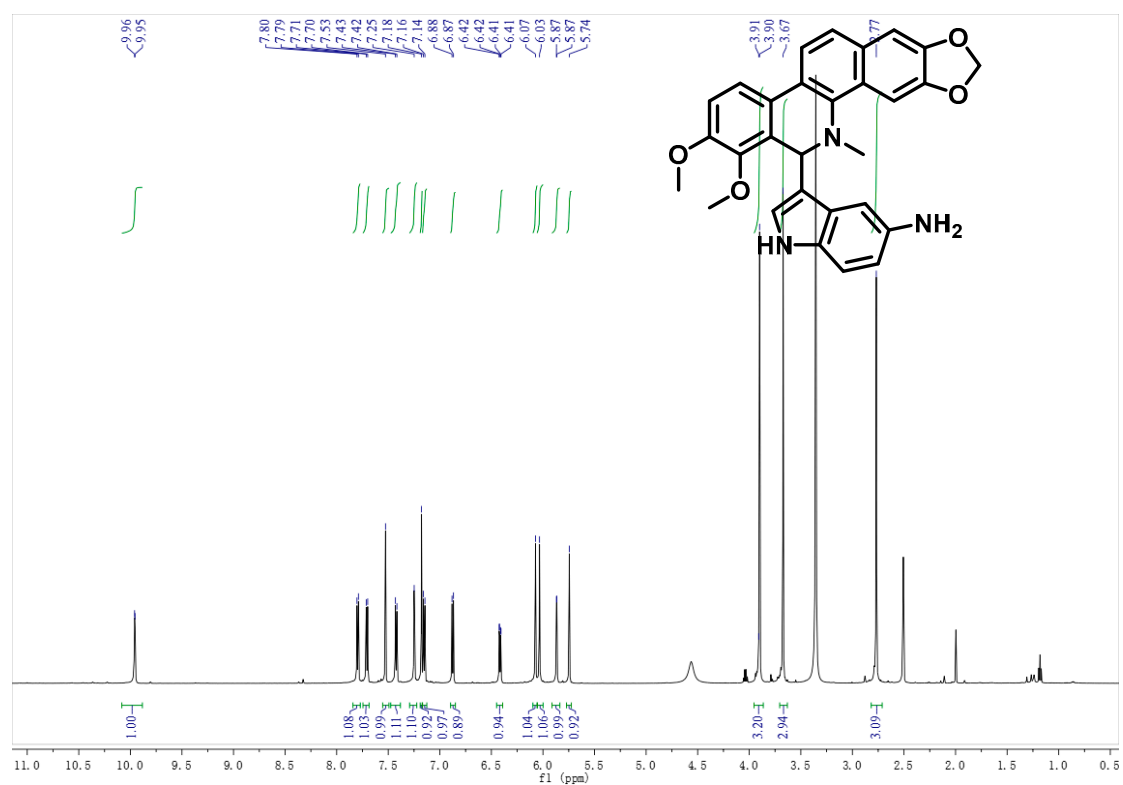Figure S59. <sup>1</sup>H-NMR spectrum of 1s (600 MHz, DMSO-d<sub>6</sub>).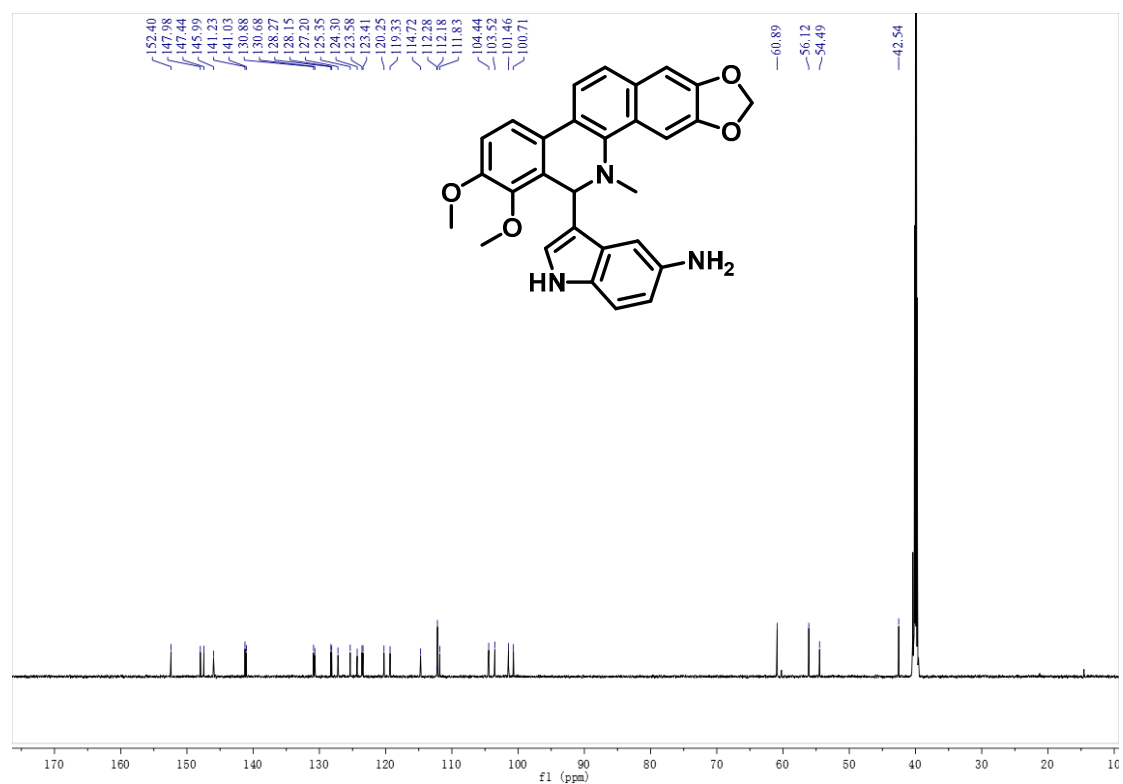Figure S60. <sup>13</sup>C-NMR spectrum of 1s (150 MHz, DMSO-d<sub>6</sub>).

B-9 #22 RT: 0.10 AV: 1 NL: 1.18E9  
T: FTMS + p ESI Full ms [100.0000-1500.0000]

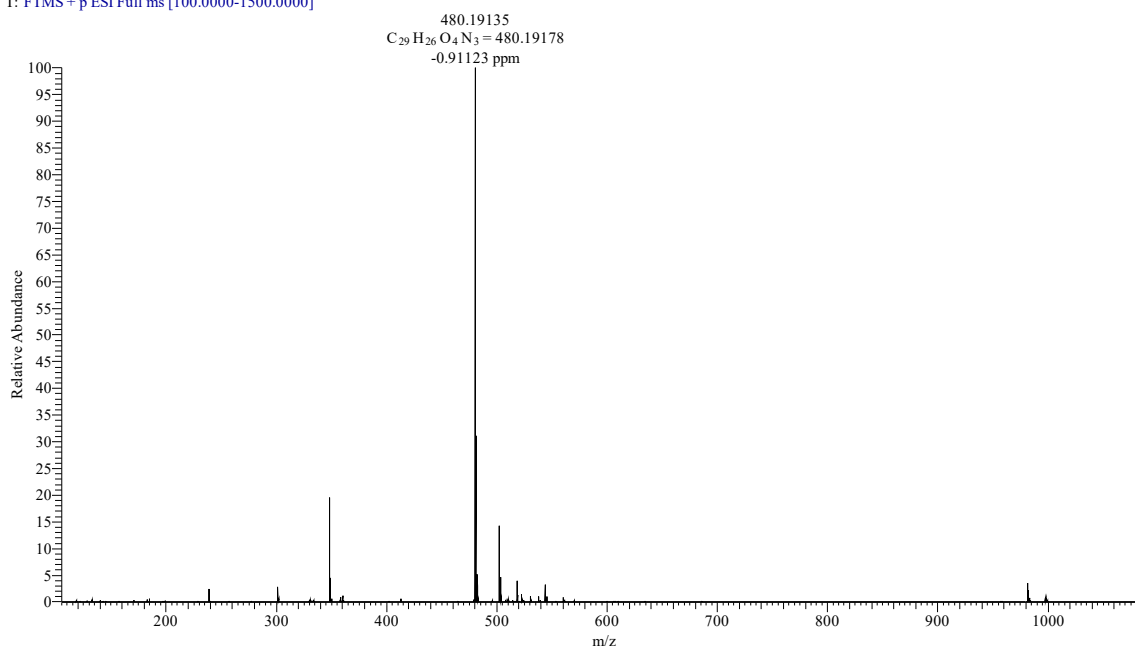

Figure S61. HR-ESI-MS spectrum of 1s.

### Compound 1t

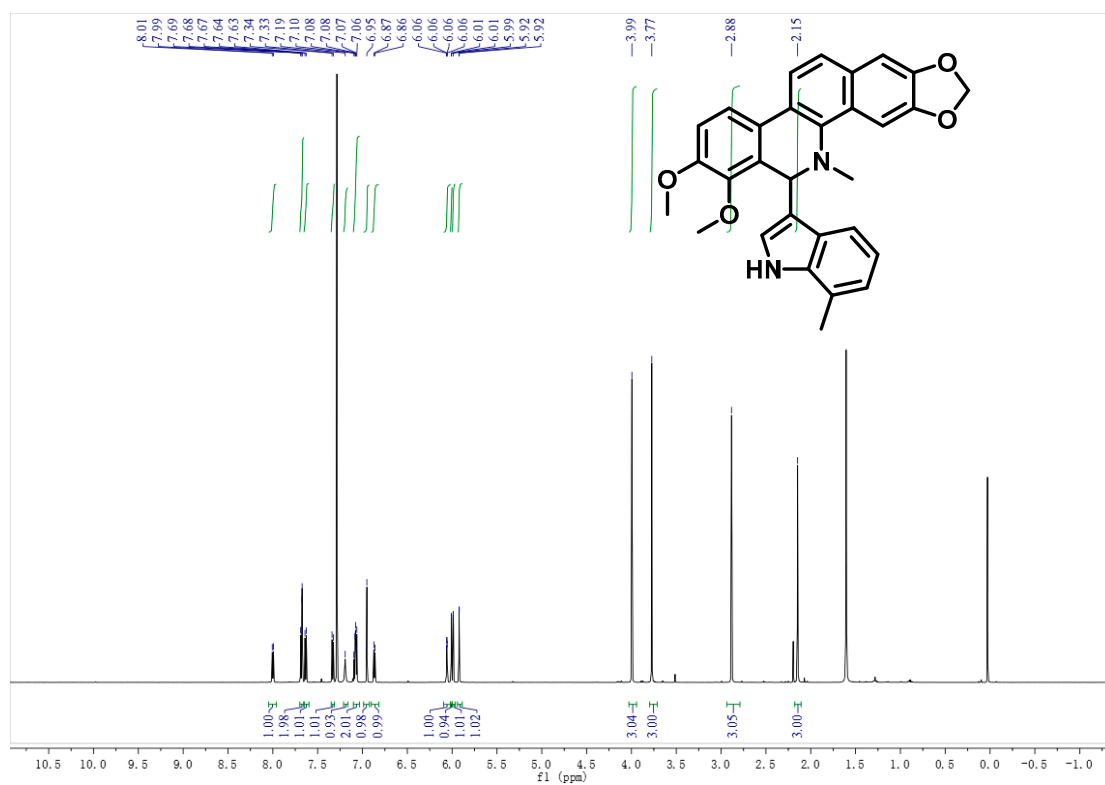

Figure S62. <sup>1</sup>H-NMR spectrum of 1t (600 MHz, CDCl<sub>3</sub>).

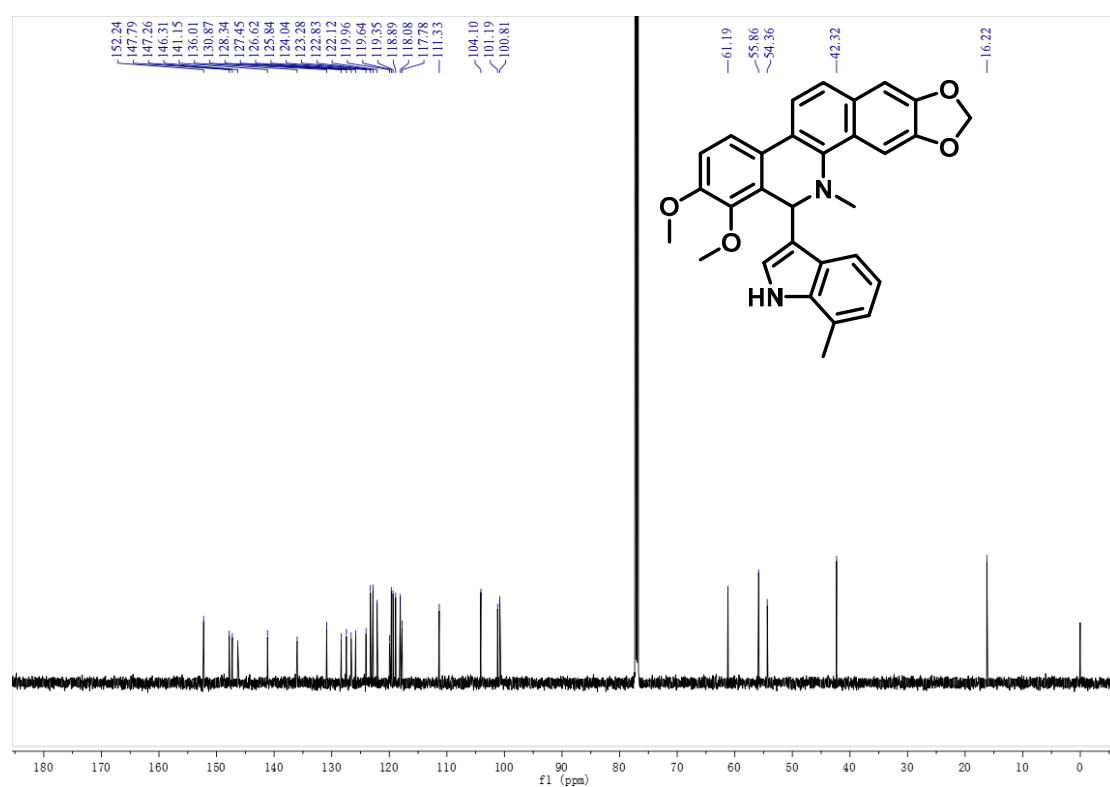

Figure S63. <sup>13</sup>C-NMR spectrum of **1t** (150 MHz, CDCl<sub>3</sub>).

B-11 #25 RT: 0.11 AV: 1 NL: 3.22E8  
T: FTMS + p ESI Full ms [100.0000-1500.0000]

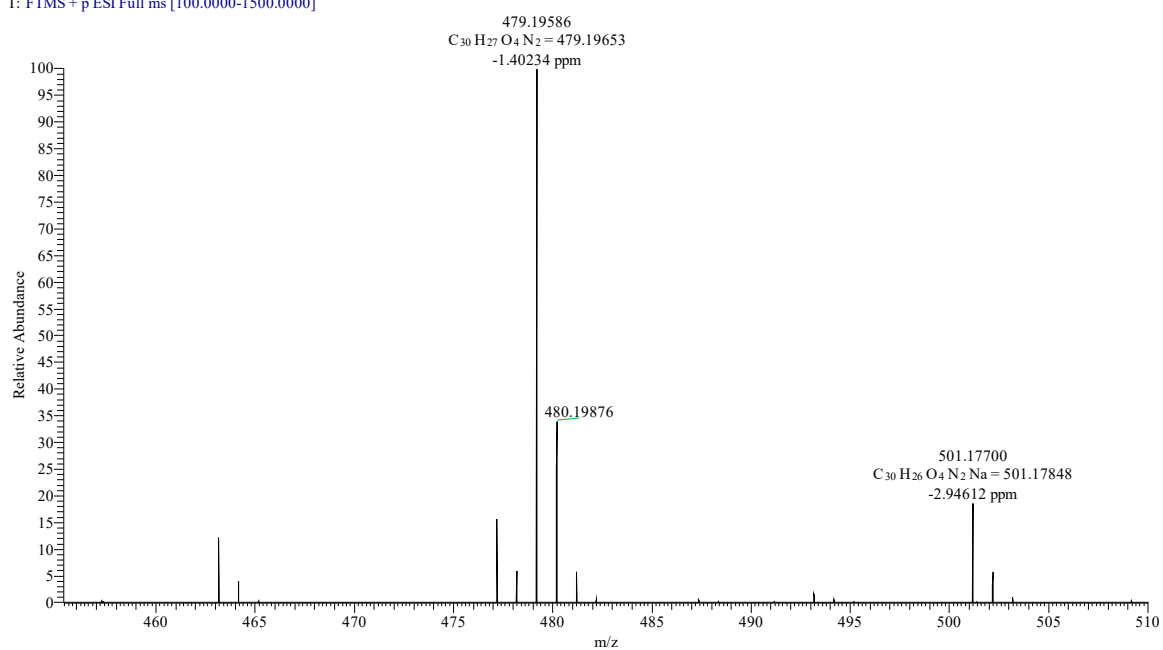

Figure S64. HR-ESI-MS spectrum of **1t**.



B-14 #19 RT: 0.08 AV: 1 NL: 2.16E8  
T: FTMS + p ESI Full ms [100.0000-1500.0000]

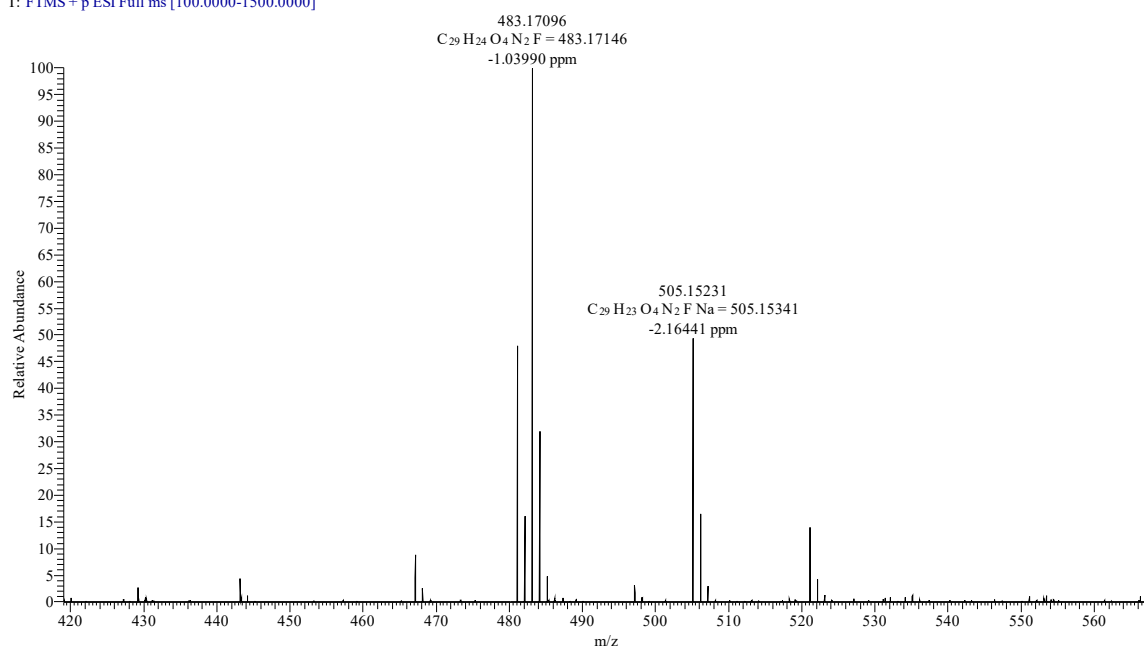

Figure S67. HR-ESI-MS spectrum of **1u**.

## Compound **2a**

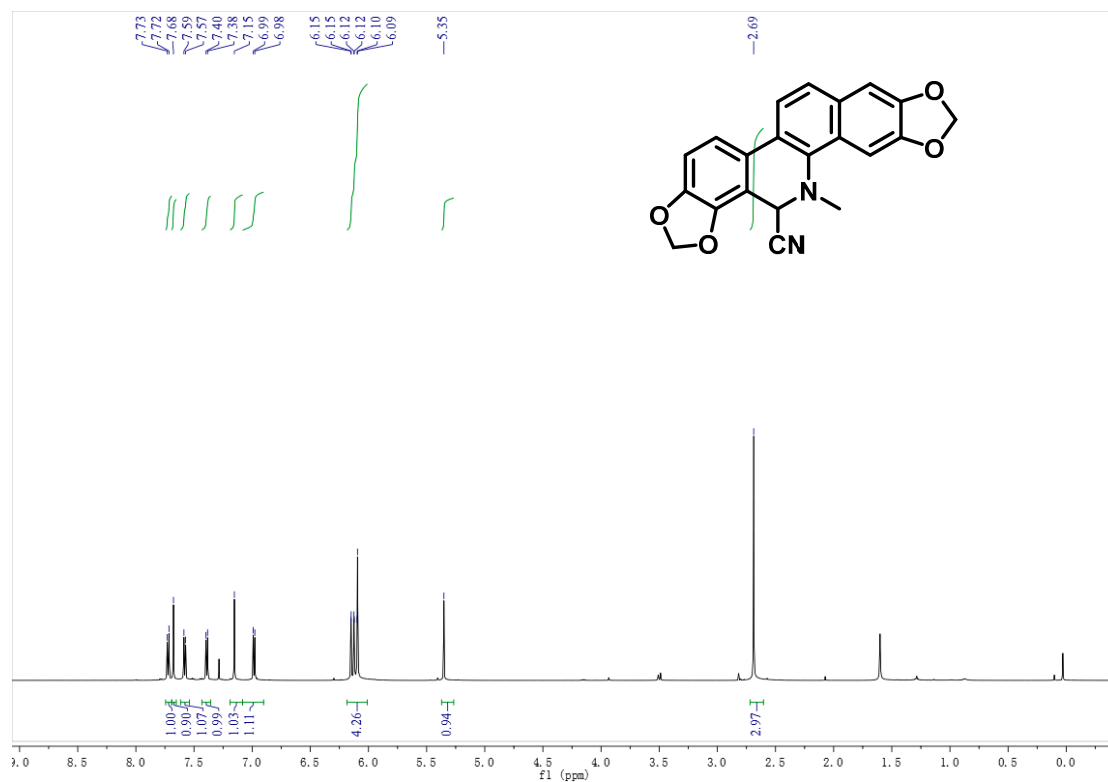

Figure S68.  $^1H$ -NMR spectrum of **2a** (600 MHz,  $CDCl_3$ ).

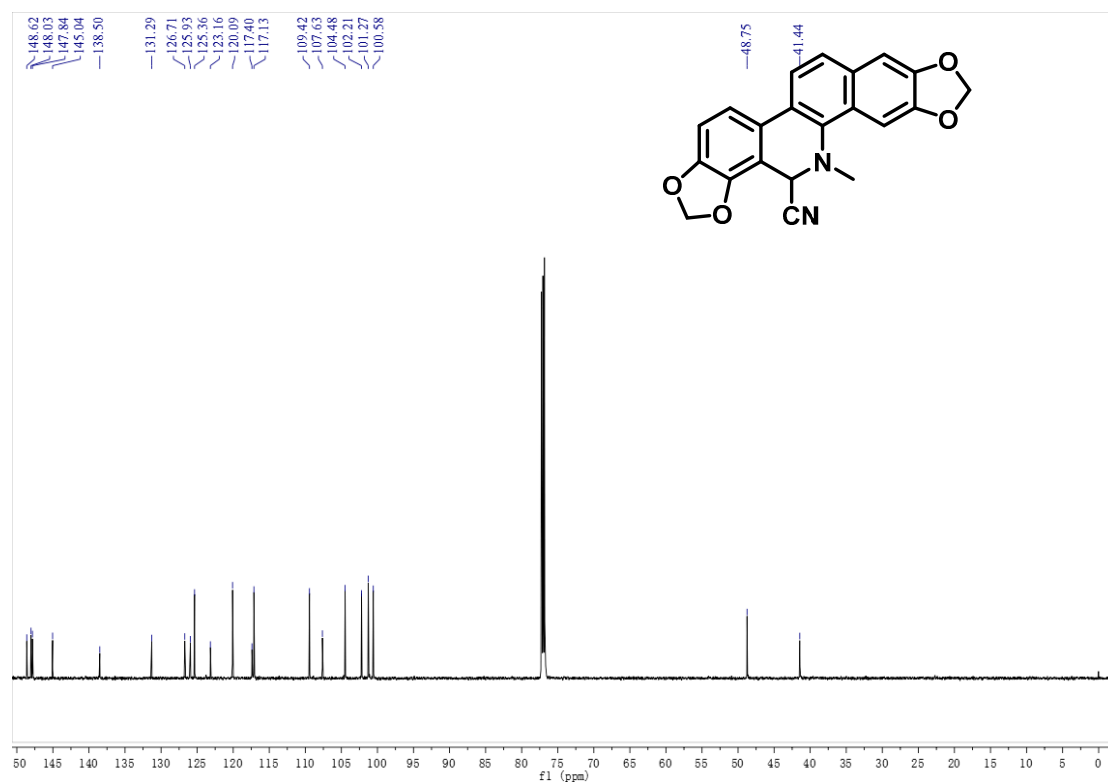

Figure S69. <sup>13</sup>C-NMR spectrum of 2a (150 MHz, CDCl<sub>3</sub>).

S-3 #61 RT: 0.27 AV: 1 NL: 1.17E7  
T: FTMS + p ESI Full ms [100.0000-1500.0000]

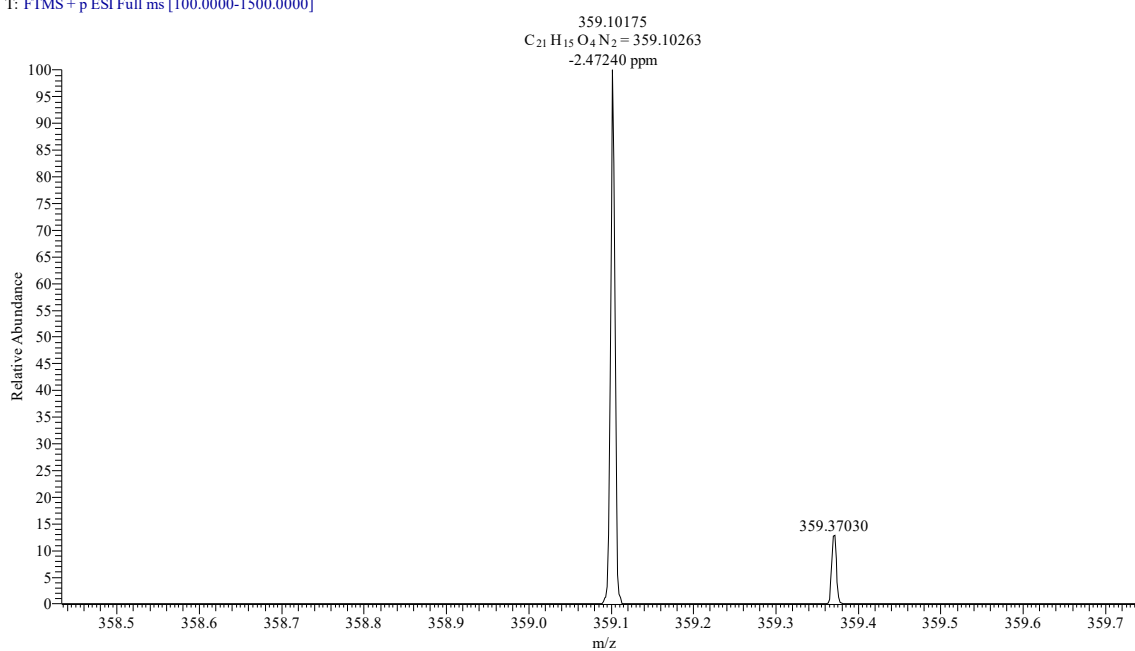

Figure S70. HR-ESI-MS spectrum of 2a.



Compound **2b**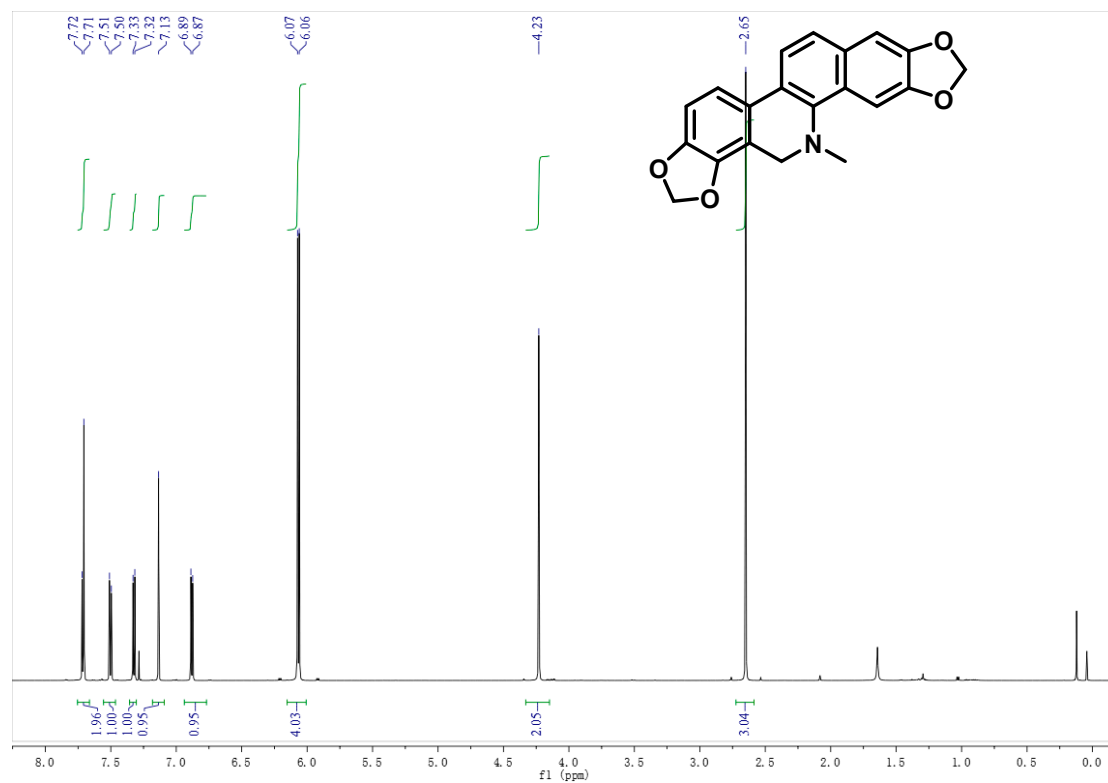**Figure S71.** <sup>1</sup>H-NMR spectrum of **2b** (600 MHz, CDCl<sub>3</sub>).

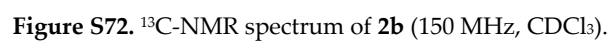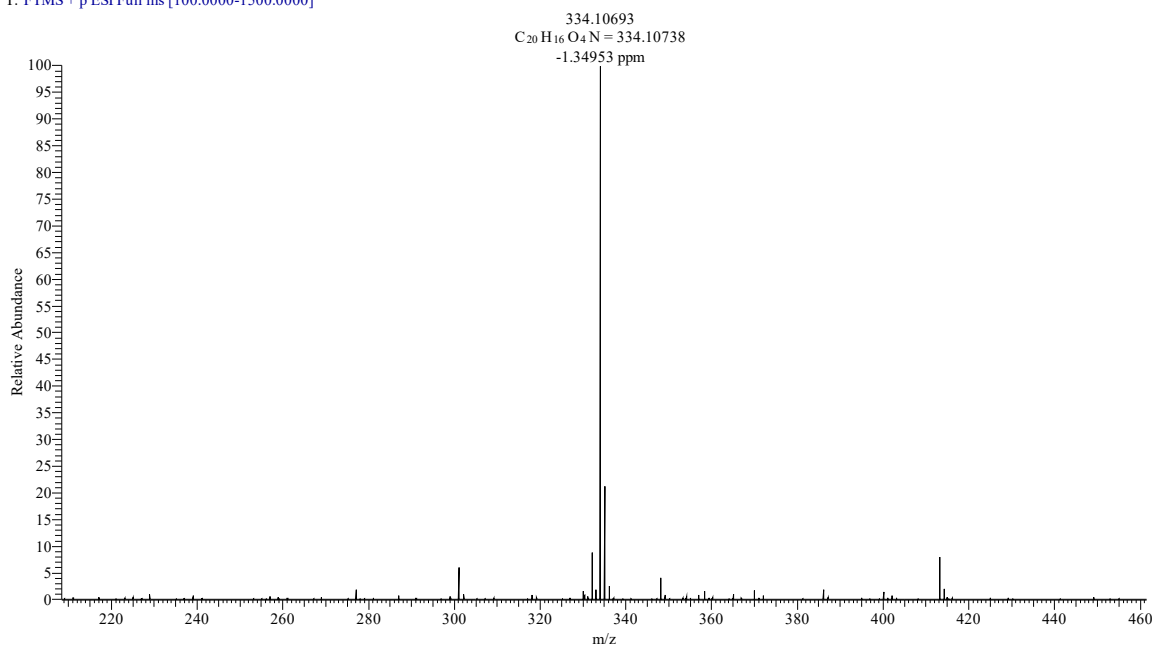

**Figure S73.** HR-ESI-MS spectrum of **2b**.

## Compound 2c

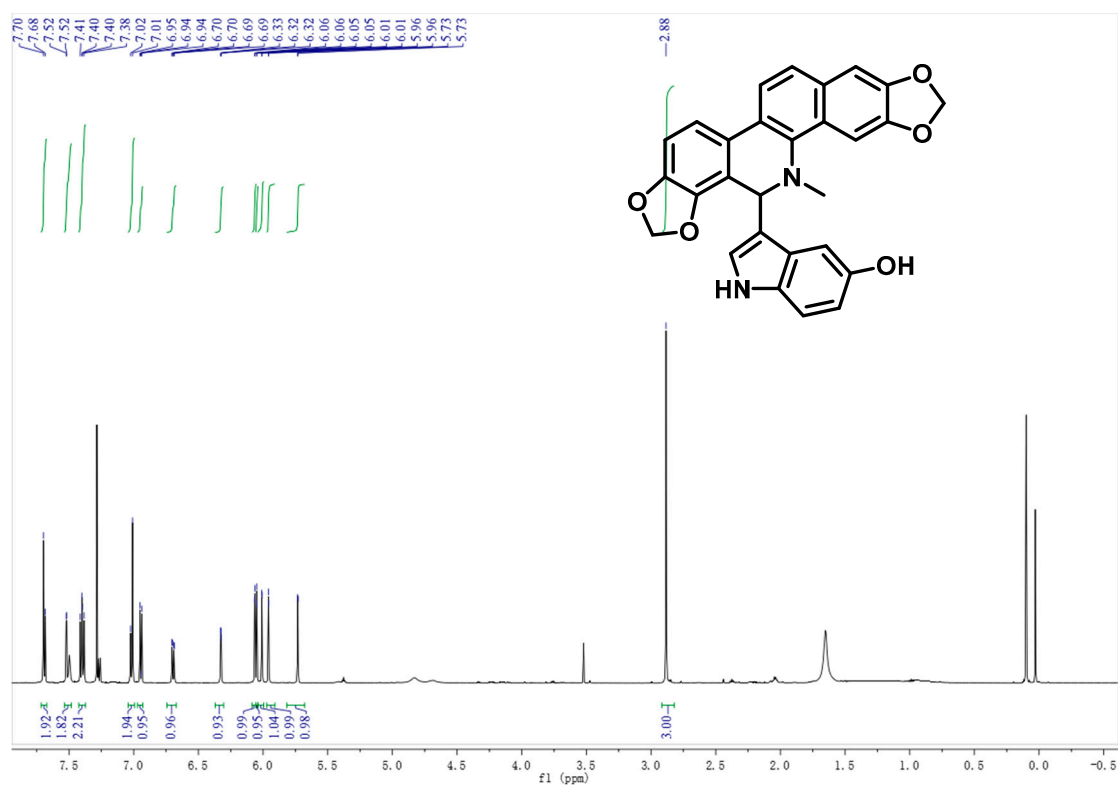Figure S74. <sup>1</sup>H-NMR spectrum of 2c (600 MHz, CDCl<sub>3</sub>).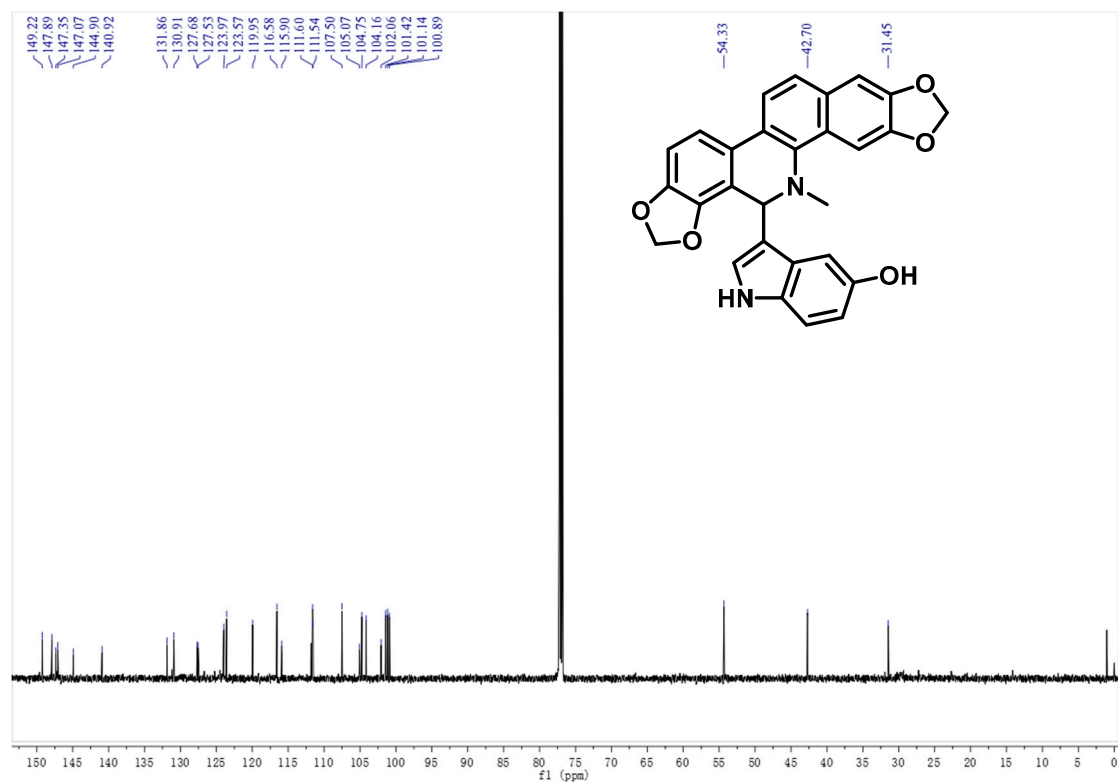Figure S75. <sup>13</sup>C-NMR spectrum of 2c (150 MHz, CDCl<sub>3</sub>).

S-4 #22 RT: 0.10 AV: 1 NL: 2.24E8  
T: FTMS + p ESI Full ms [100.0000-1500.0000]

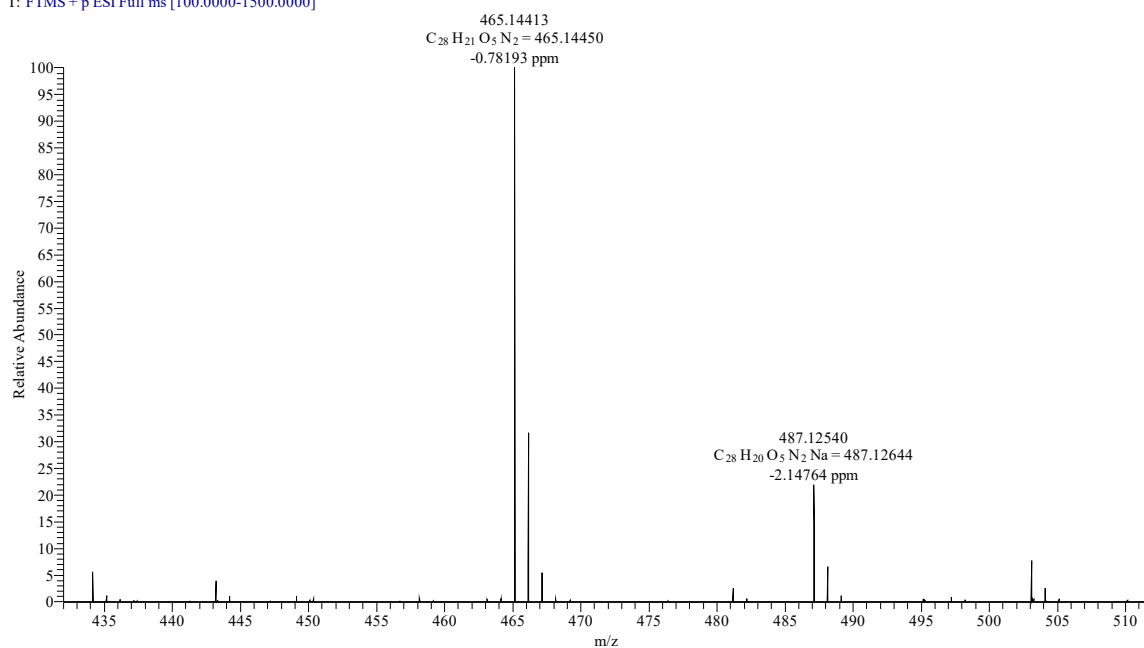

Figure S76. HR-ESI-MS spectrum of 2c.

## Compound 2d

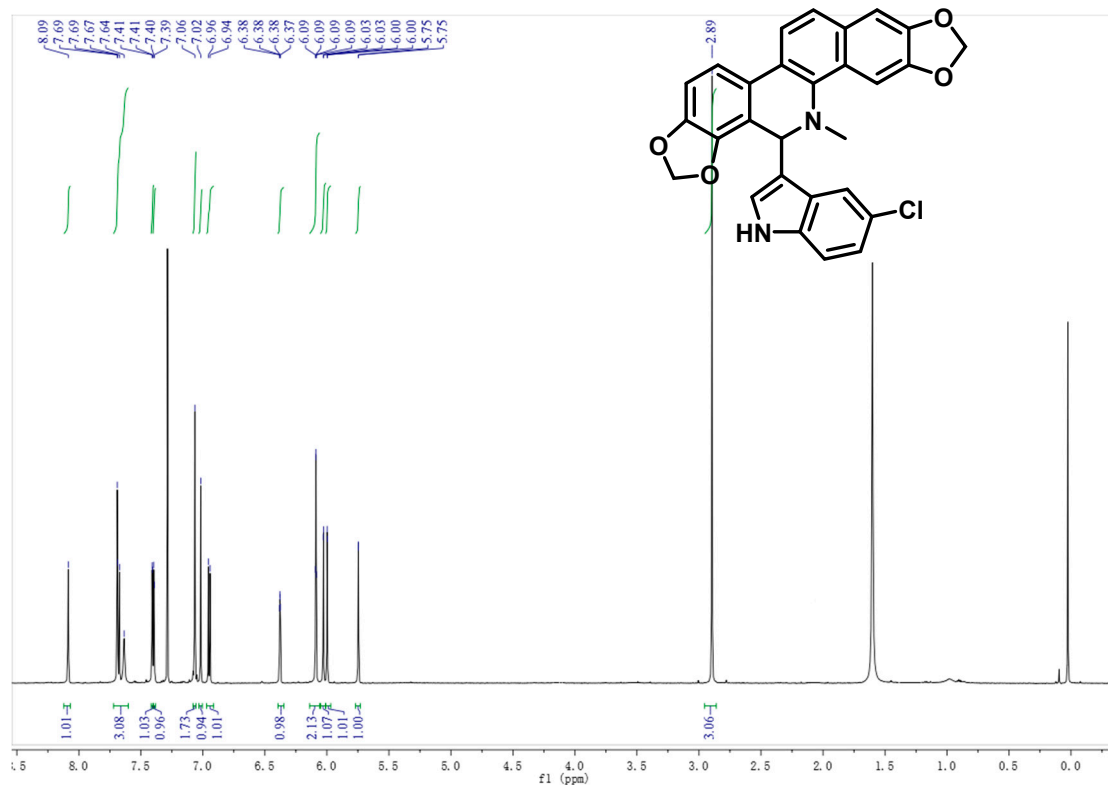

Figure S77. <sup>1</sup>H-NMR spectrum of 2d (600 MHz, CDCl<sub>3</sub>).

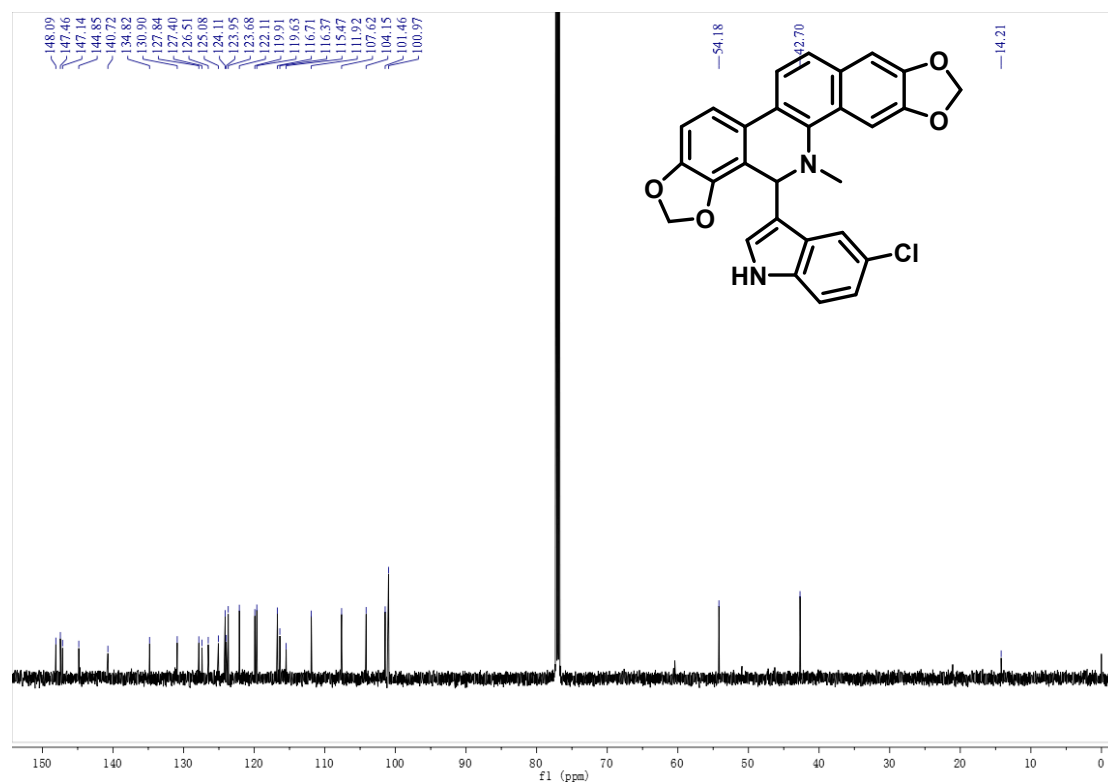

Figure S78.  $^{13}\text{C}$ -NMR spectrum of 2d (150 MHz,  $\text{CDCl}_3$ ).

S-5 #29 RT: 0.13 AV: 1 NL: 2.28E8  
T: FTMS + p ESI Full ms [100.0000-1500.0000]

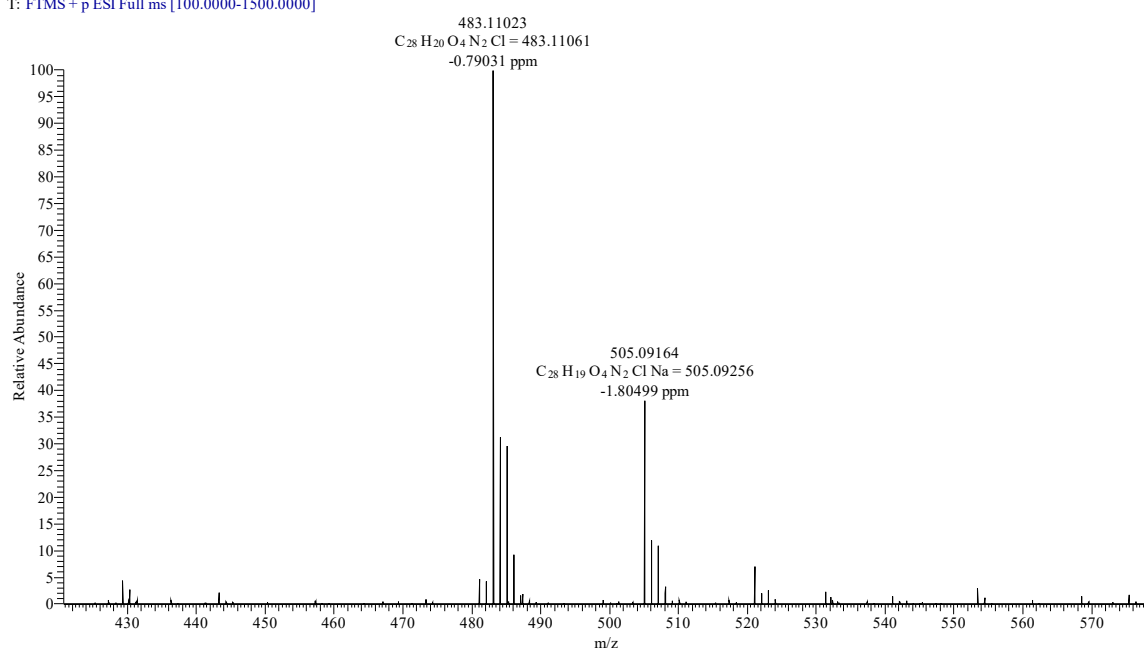

Figure S79. HR-ESI-MS spectrum of 2d.

## Compound 2e

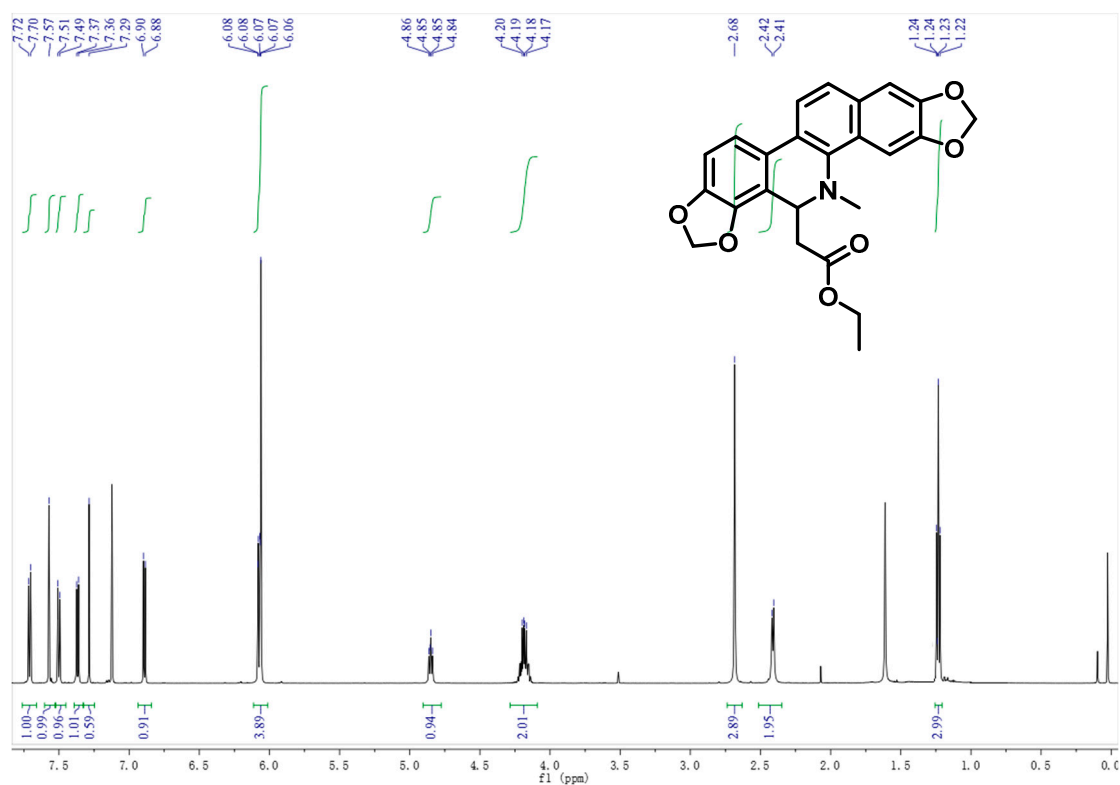Figure S80. <sup>1</sup>H-NMR spectrum of 2e (600 MHz, CDCl<sub>3</sub>).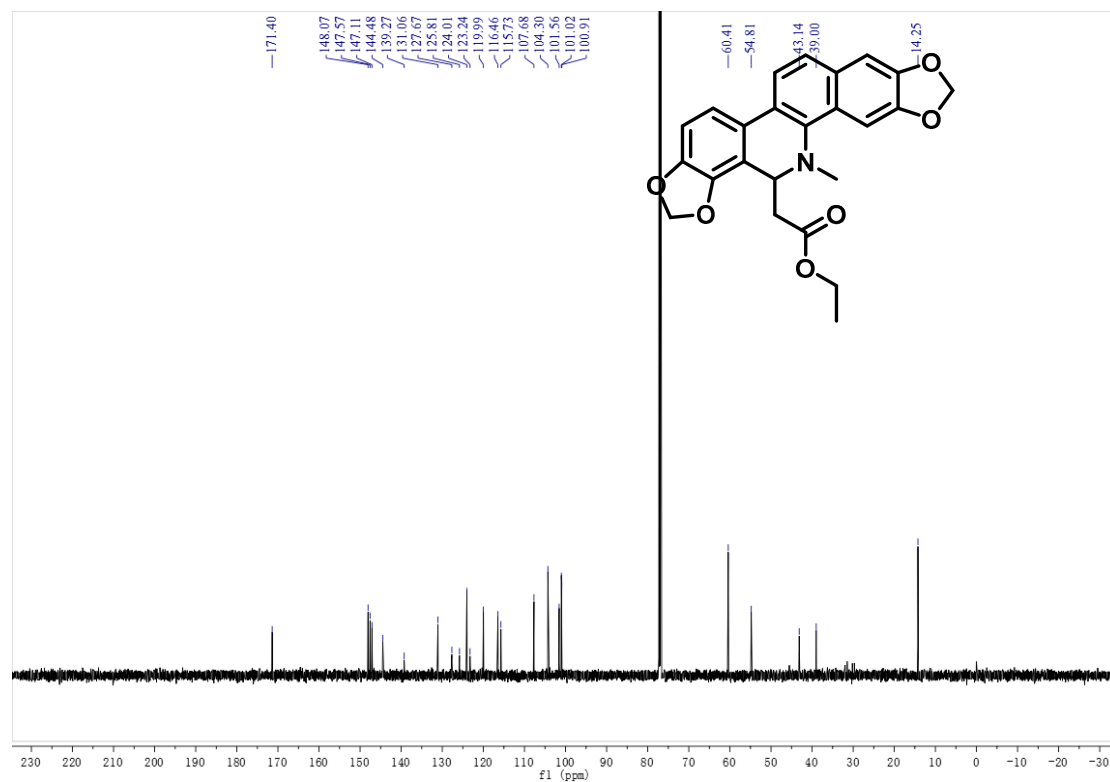Figure S81. <sup>13</sup>C-NMR spectrum of 2e (150 MHz, CDCl<sub>3</sub>).

S-1 #28 RT: 0.12 AV: 1 NL: 2.29E8  
T: FTMS + p ESI Full ms [100.0000-1500.0000]

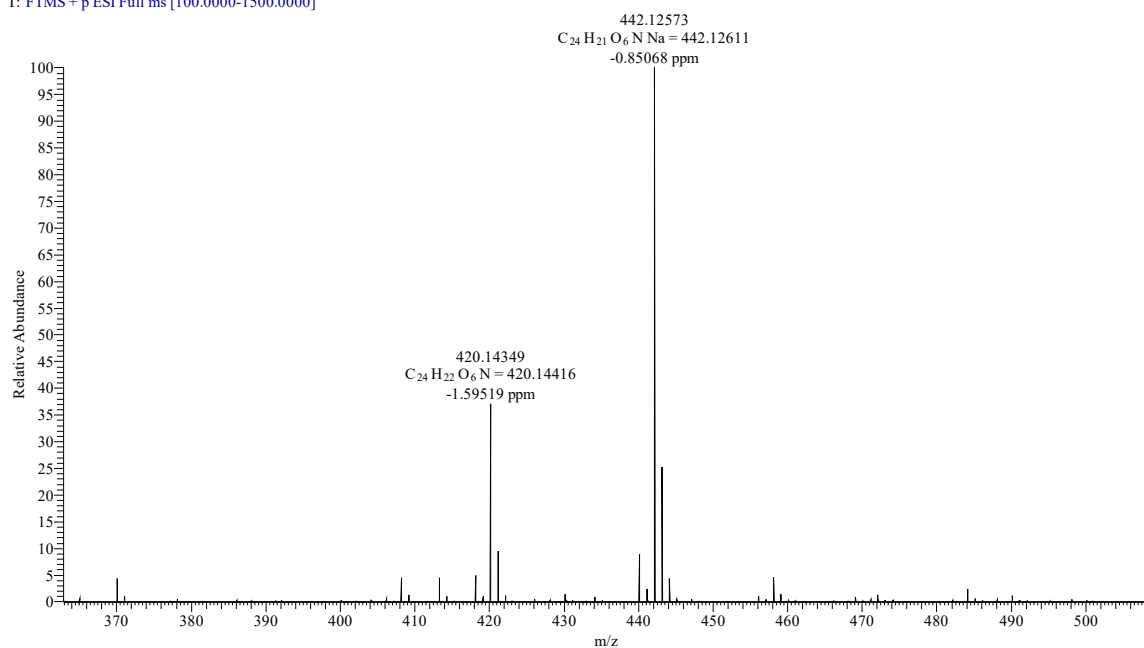

Figure S82. HR-ESI-MS spectrum of 2e.

## Compound 2f

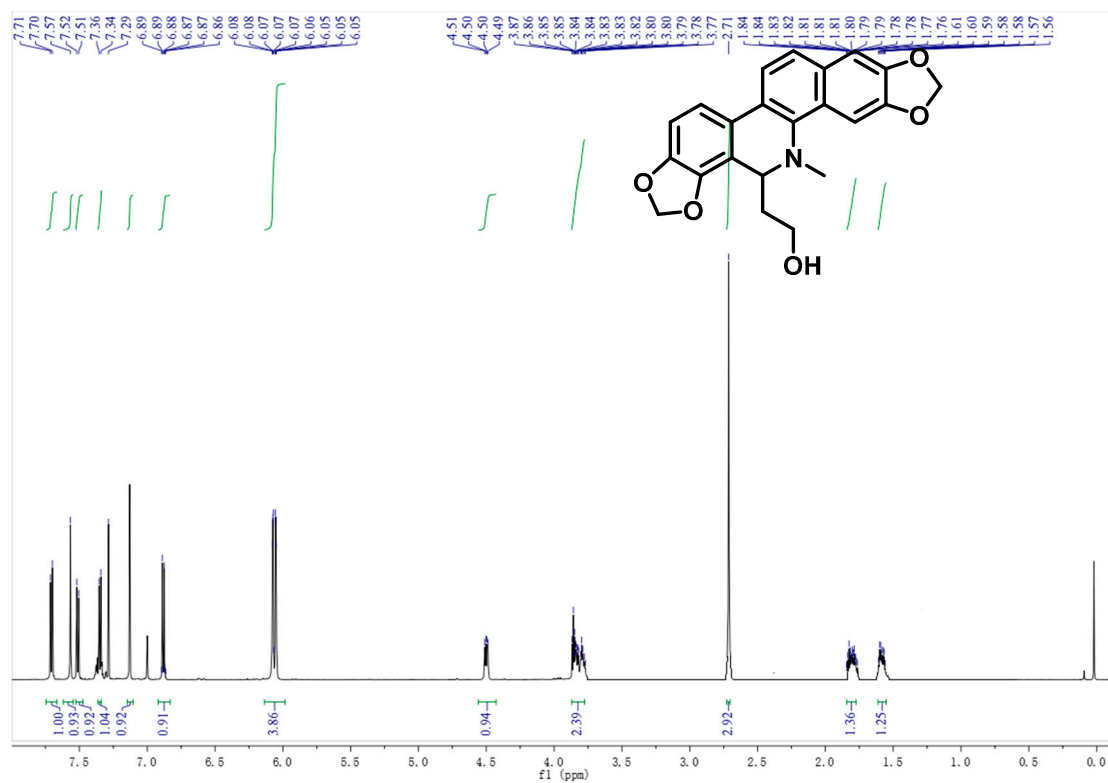

Figure S83. <sup>1</sup>H-NMR spectrum of 2f (600 MHz, CDCl<sub>3</sub>).

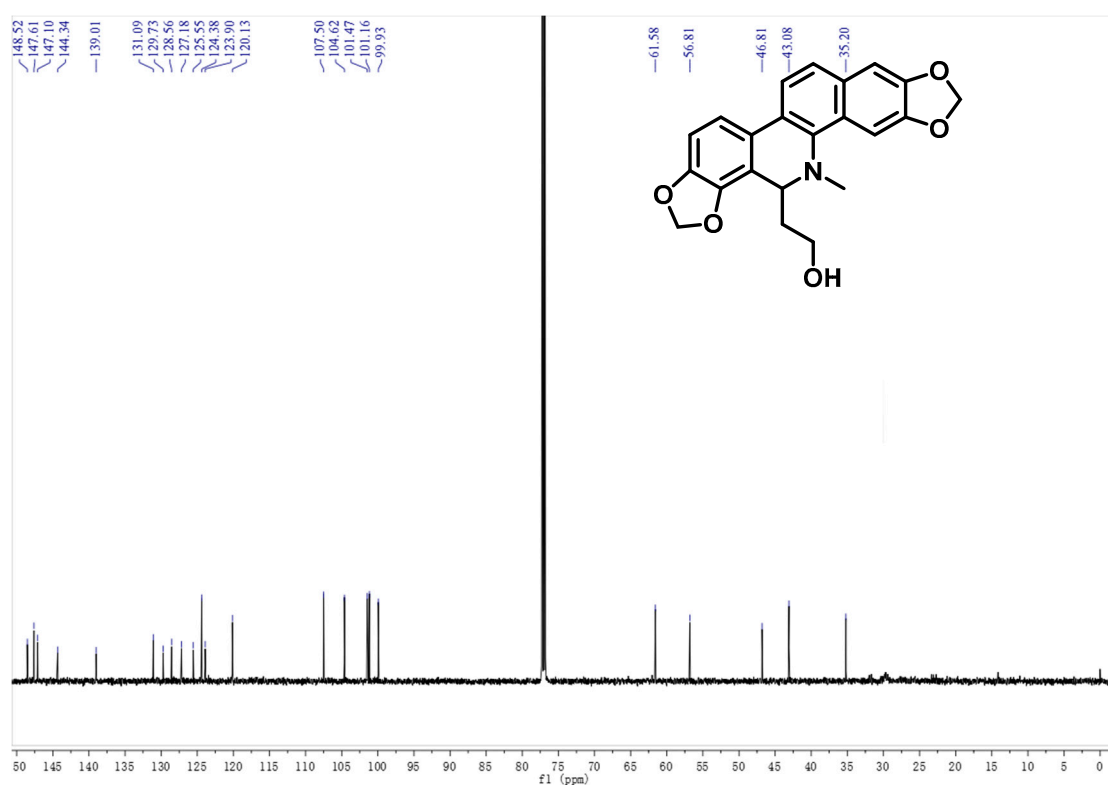

Figure S84. <sup>13</sup>C-NMR spectrum of 2f (150 MHz, CDCl<sub>3</sub>).

S-2 #34 RT: 0.15 AV: 1 NL: 4.27E8  
T: FTMS + p ESI Full ms [100.0000-1500.0000]

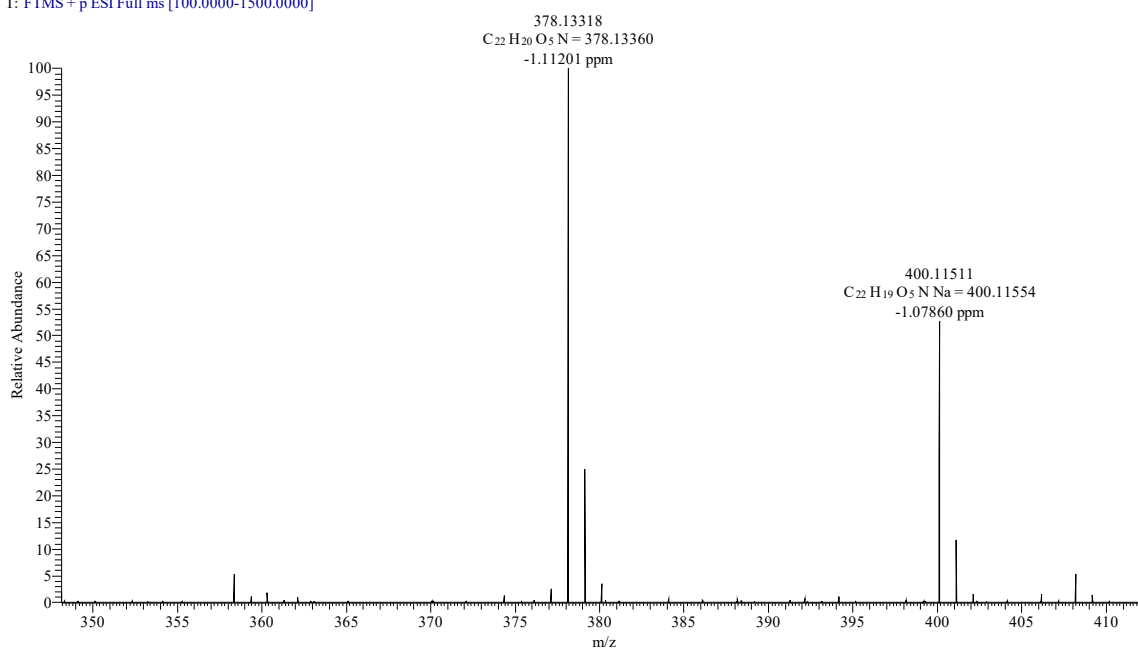

Figure S85. HR-ESI-MS spectrum of 2f.



Compound **2g**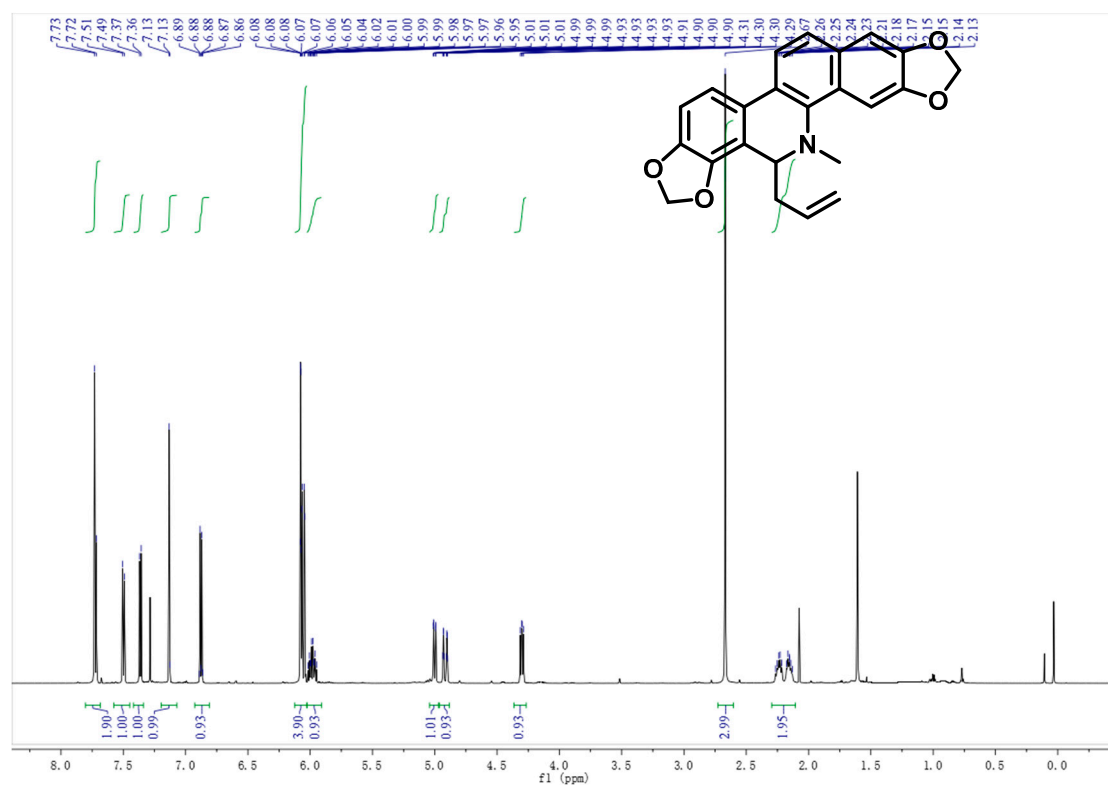Figure S86. <sup>1</sup>H-NMR spectrum of **2g** (600 MHz, CDCl<sub>3</sub>).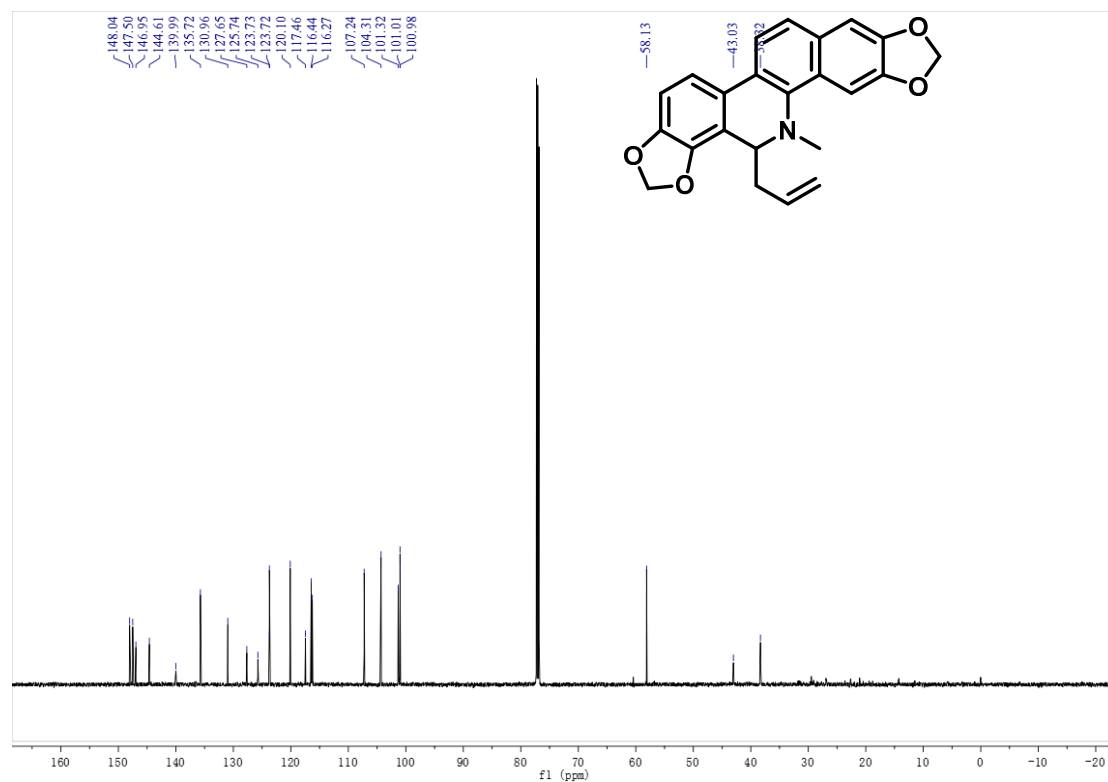Figure S87. <sup>13</sup>C-NMR spectrum of **2g** (150 MHz, CDCl<sub>3</sub>).

S-11 #32 RT: 0.14 AV: 1 NL: 3.04E8  
T: FTMS + p ESI Full ms [100.0000-1500.0000]

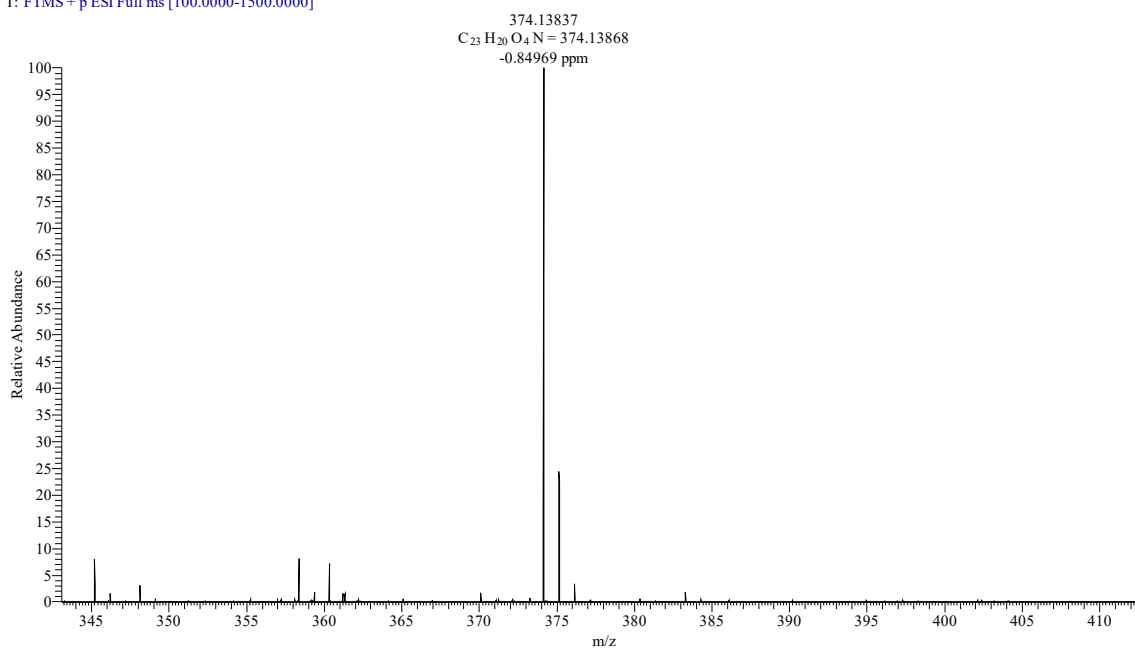

Figure S88. HR-ESI-MS spectrum of 2g

## Compound 2h

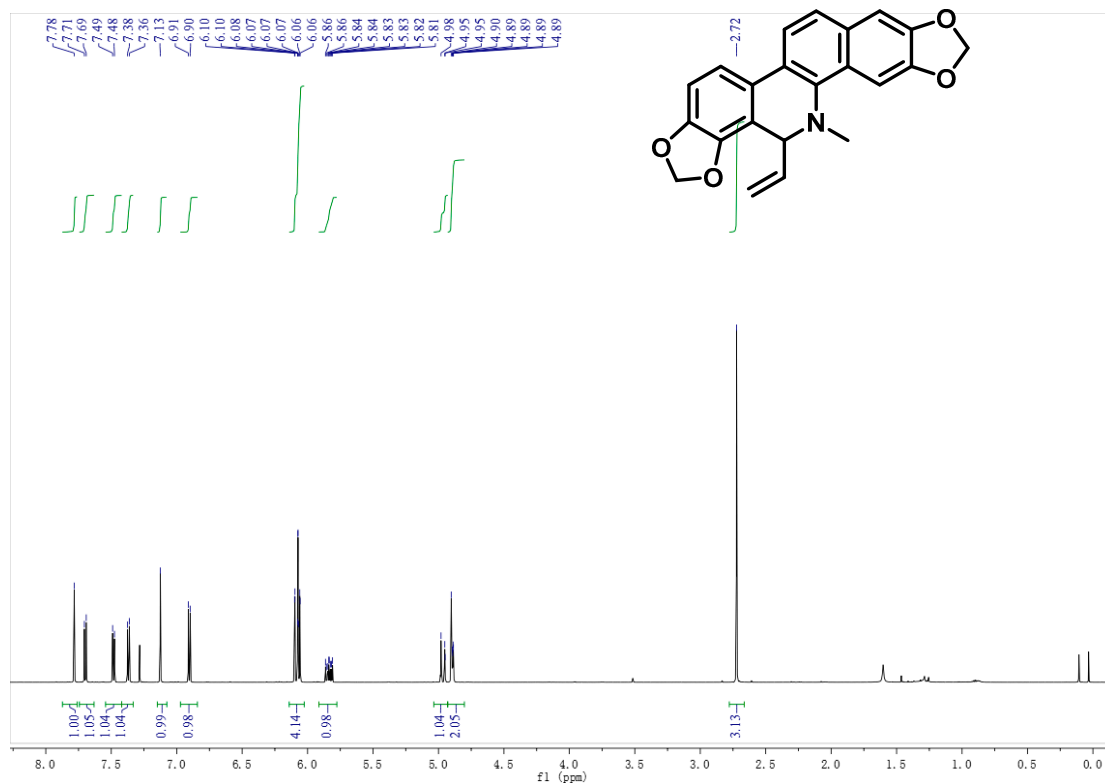

Figure S89. <sup>1</sup>H-NMR spectrum of 2h (600 MHz, CDCl<sub>3</sub>).

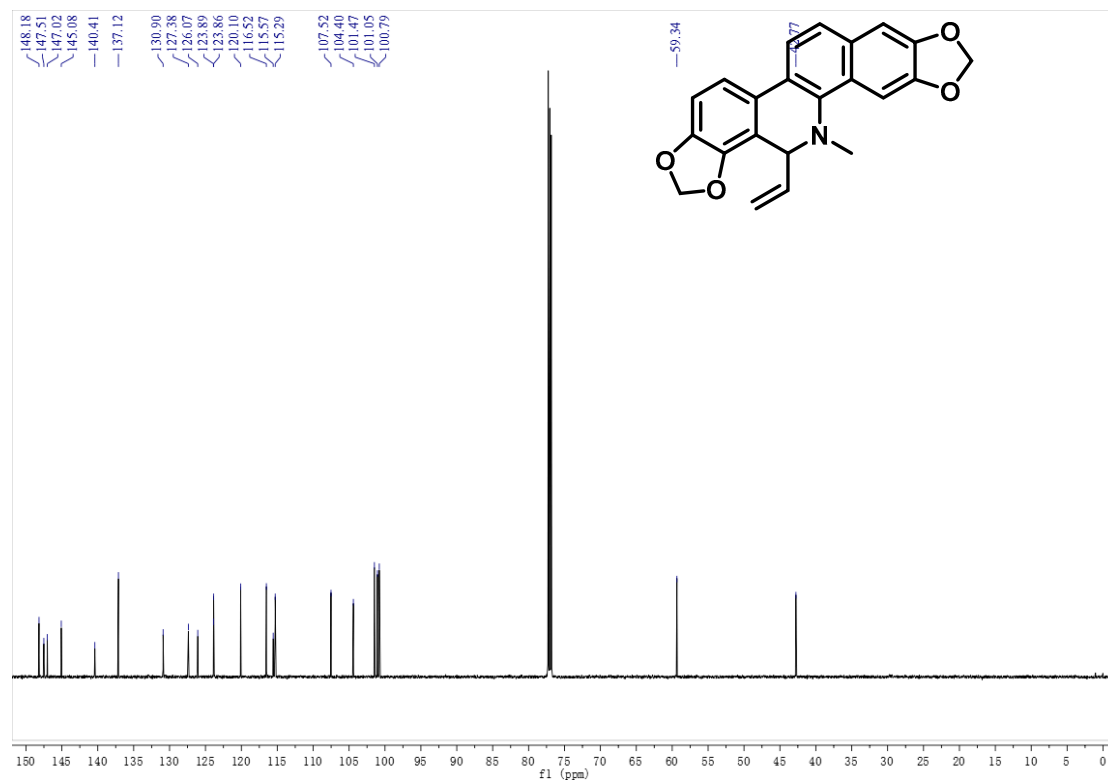

Figure S90. <sup>13</sup>C-NMR spectrum of **2h** (150 MHz, CDCl<sub>3</sub>).

S-12 #129 RT: 0.57 AV: 1 NL: 8.36E7  
T: FTMS + p ESI Full ms [100.0000-1500.0000]

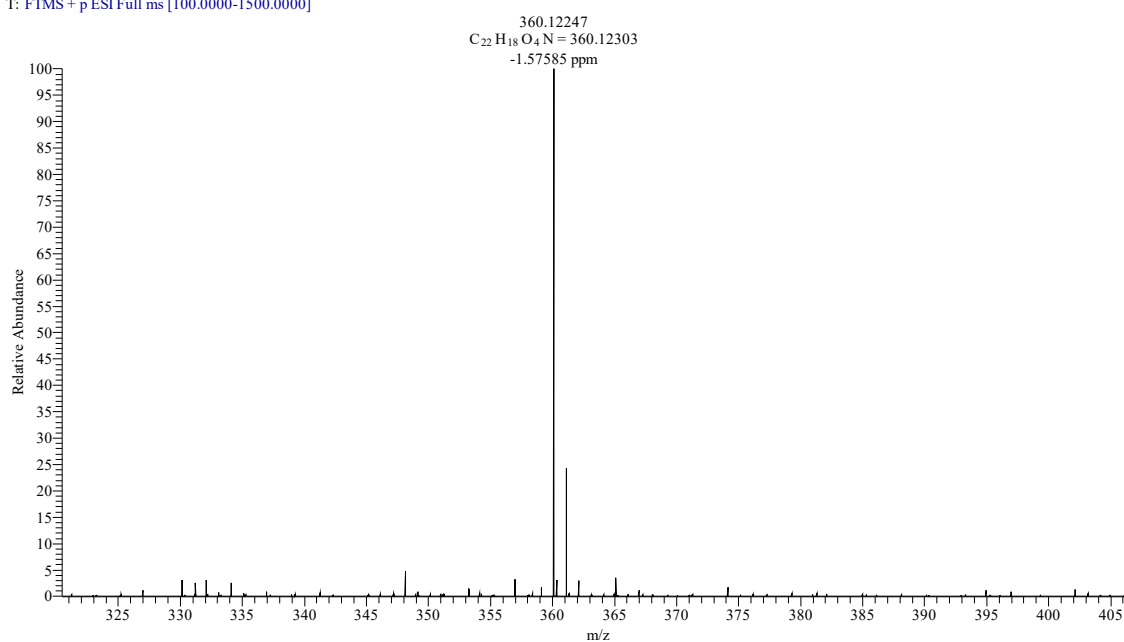

Figure S91. HR-ESI-MS spectrum of **2h**.

## Compound 2i

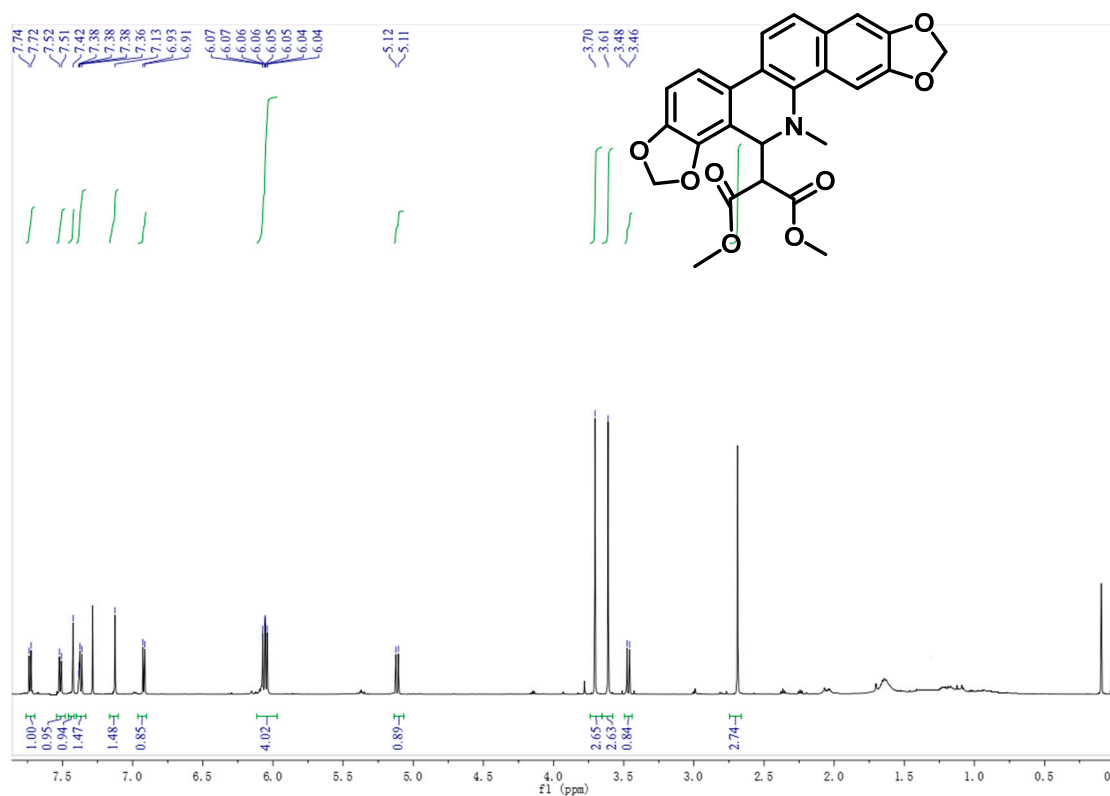Figure S92. <sup>1</sup>H-NMR spectrum of 2i (600 MHz, CDCl<sub>3</sub>).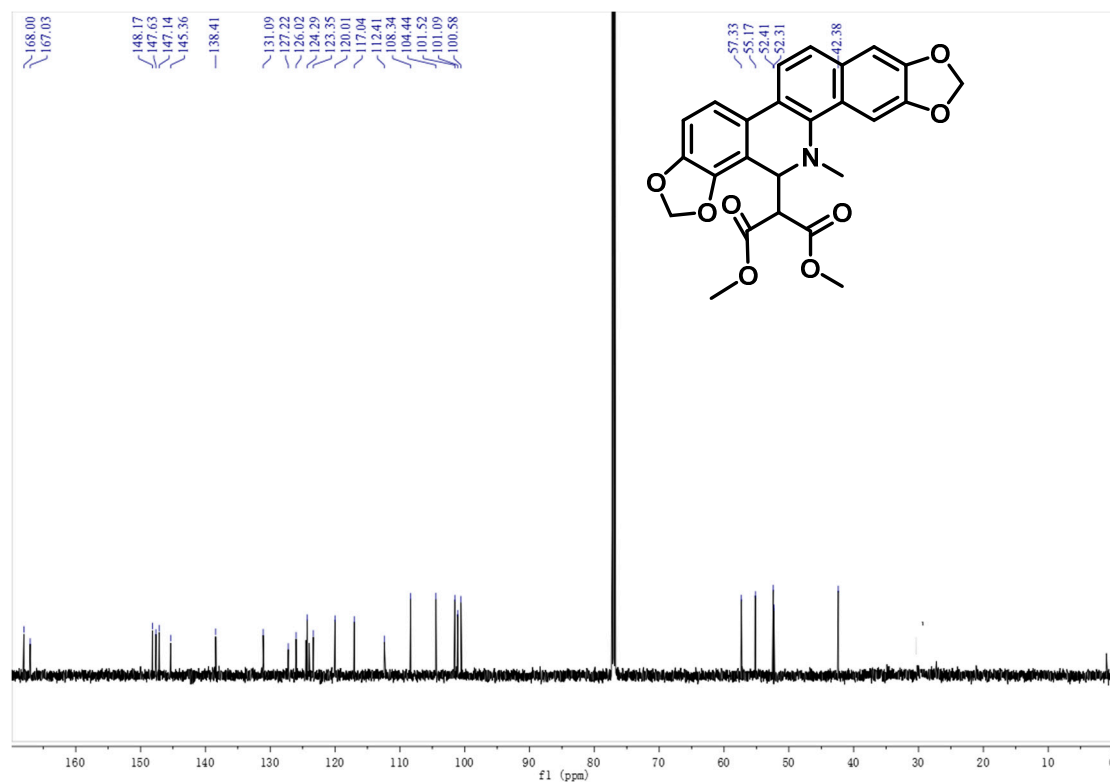Figure S93. <sup>13</sup>C-NMR spectrum of 2i (150 MHz, CDCl<sub>3</sub>).

S-7 #24 RT: 0.10 AV: 1 NL: 2.19E8  
T: FTMS + p ESI Full ms [100.0000-1500.0000]

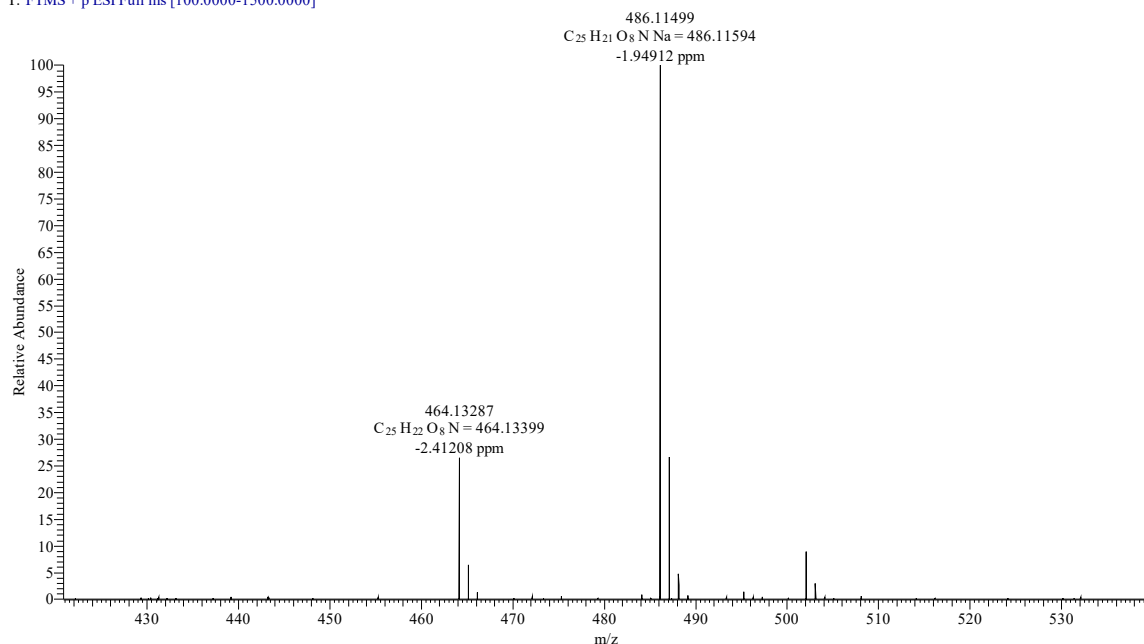

Figure S94. HR-ESI-MS spectrum of 2i.

## Compound 2j

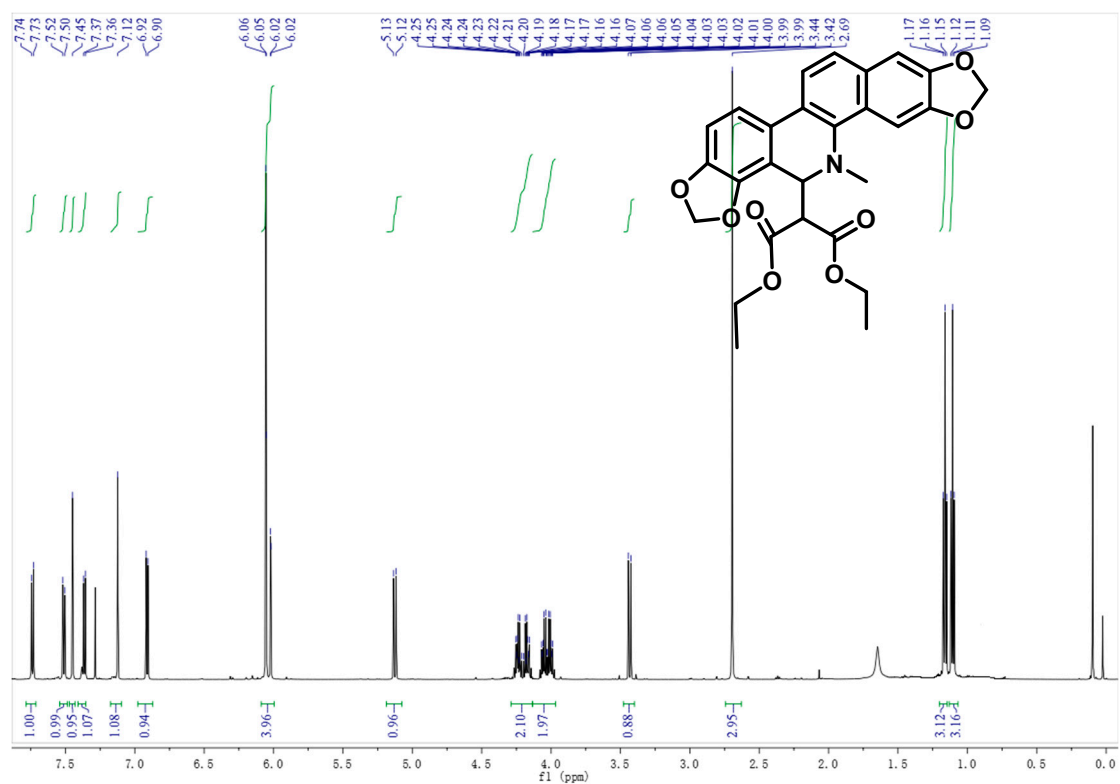

Figure S95. <sup>1</sup>H-NMR spectrum of 2j (600 MHz, CDCl<sub>3</sub>).

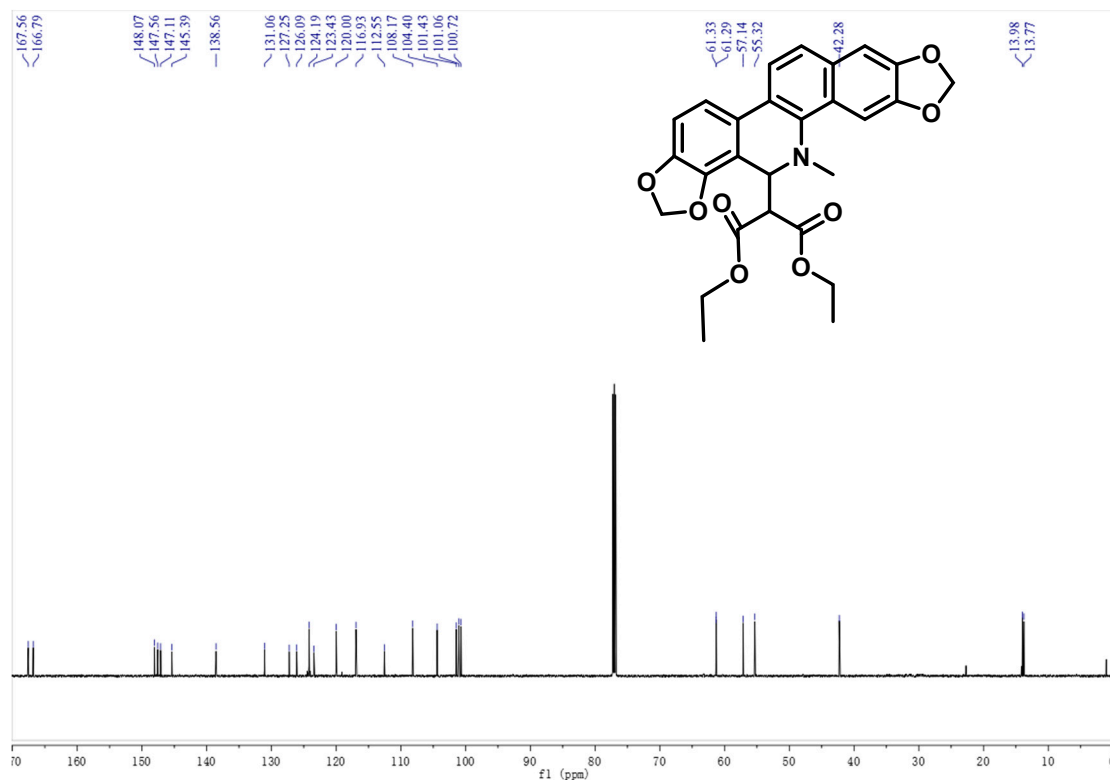

Figure S96.  $^{13}\text{C}$ -NMR spectrum of 2j (150 MHz,  $\text{CDCl}_3$ ).

S-6 #30 RT: 0.13 AV: 1 NL: 2.01E8  
T: FTMS + p ESI Full ms [100.0000-1500.0000]

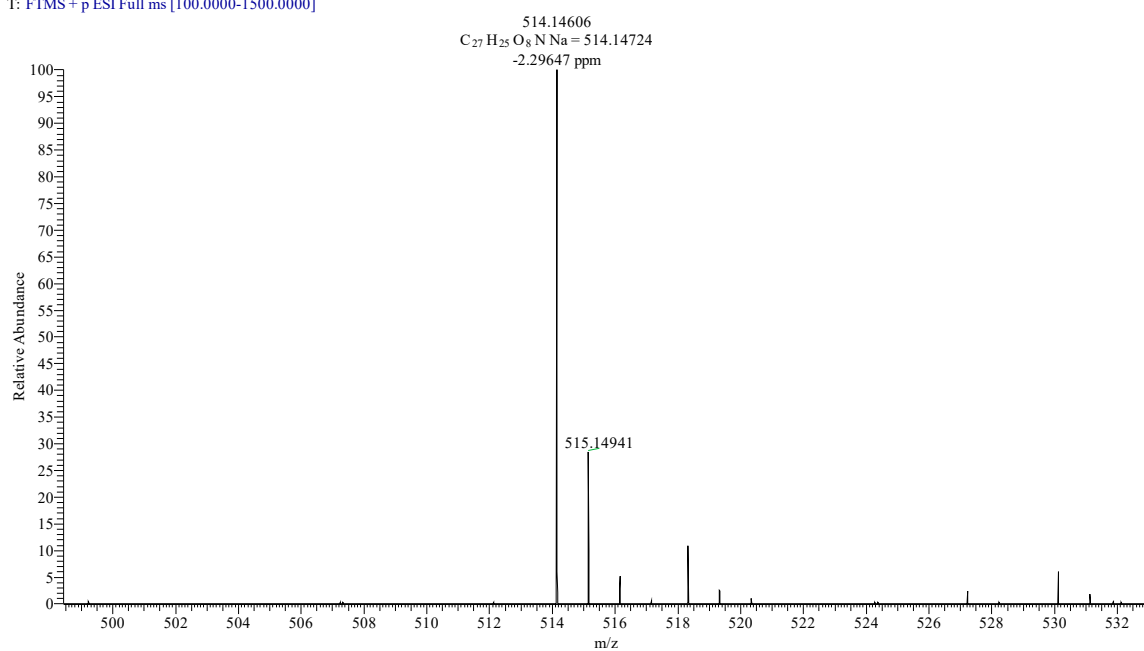

Figure S97. HR-ESI-MS spectrum of 2j.

## Compound 2k

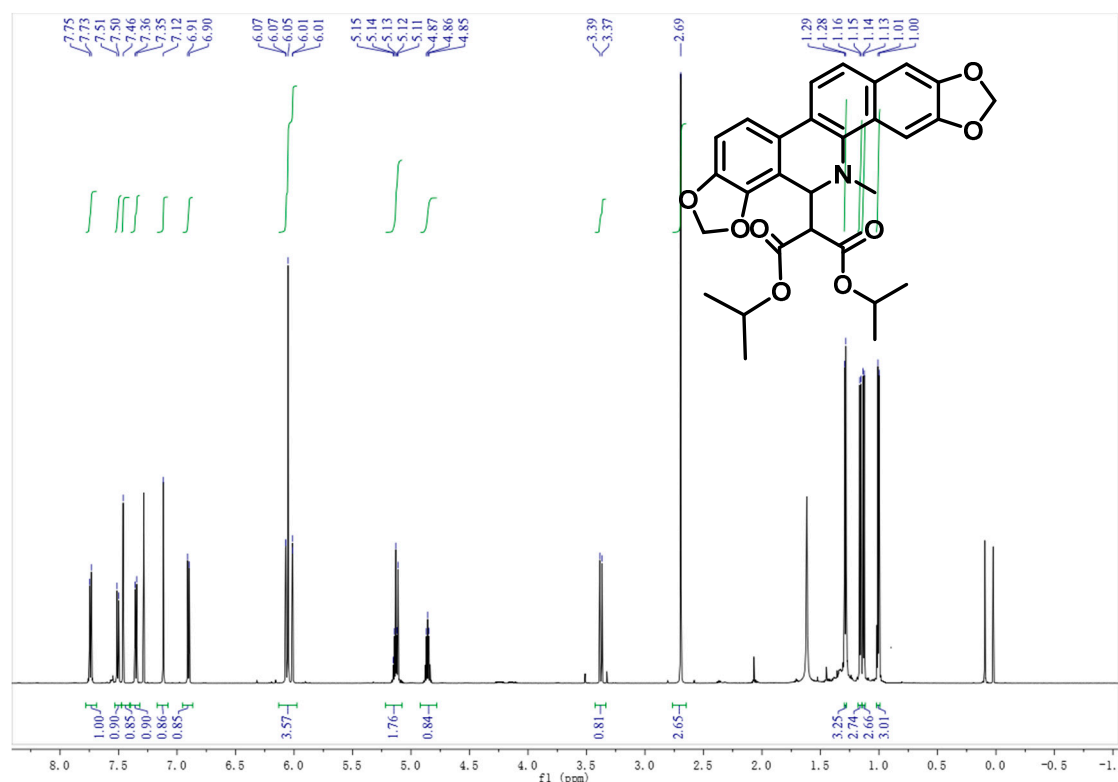Figure S98. <sup>1</sup>H-NMR spectrum of 2k (600 MHz, CDCl<sub>3</sub>).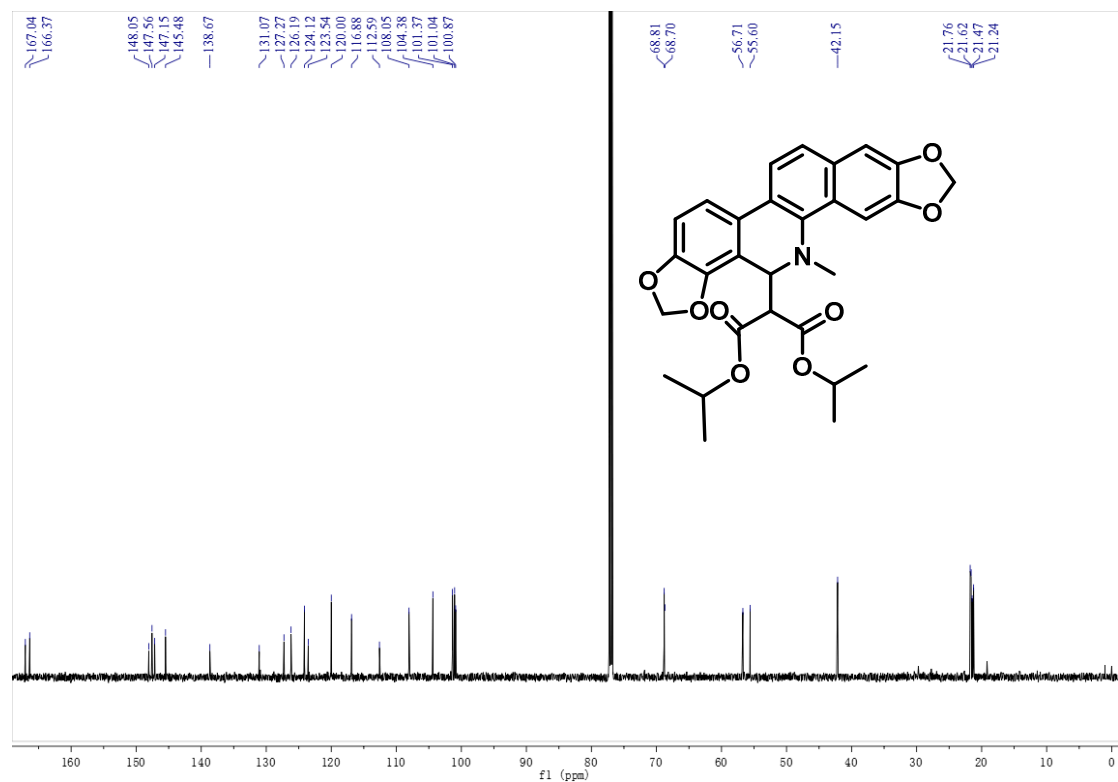Figure S99. <sup>13</sup>C-NMR spectrum of 2k (150 MHz, CDCl<sub>3</sub>).

S-9 #31 RT: 0.14 AV: 1 NL: 1.16E9  
T: FTMS + p ESI Full ms [100.0000-1500.0000]

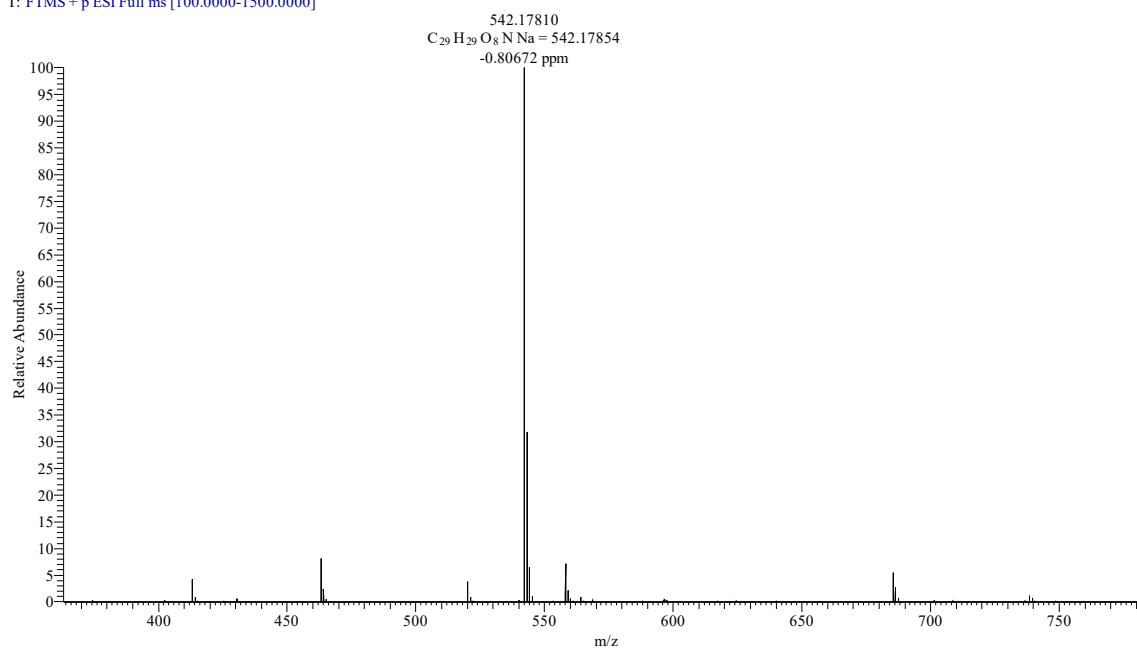

Figure S100. HR-ESI-MS spectrum of 2k.

## Compound 2l

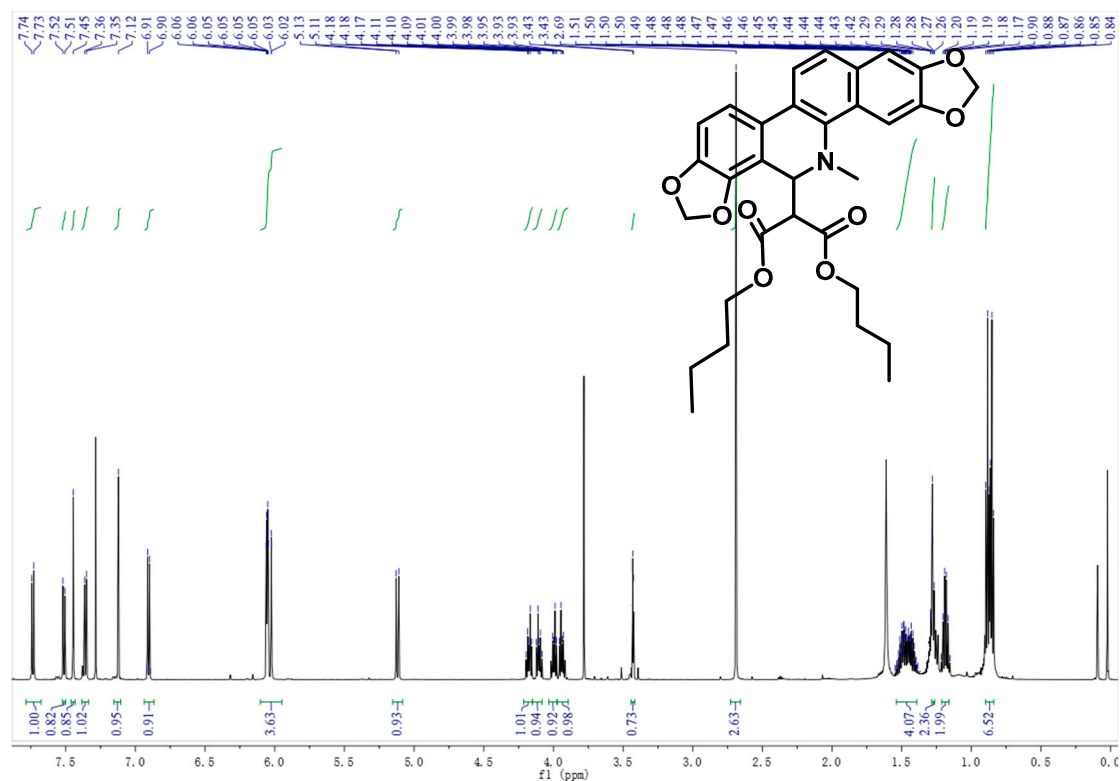

Figure S101.  $^1H$ -NMR spectrum of 2l (600 MHz,  $CDCl_3$ ).



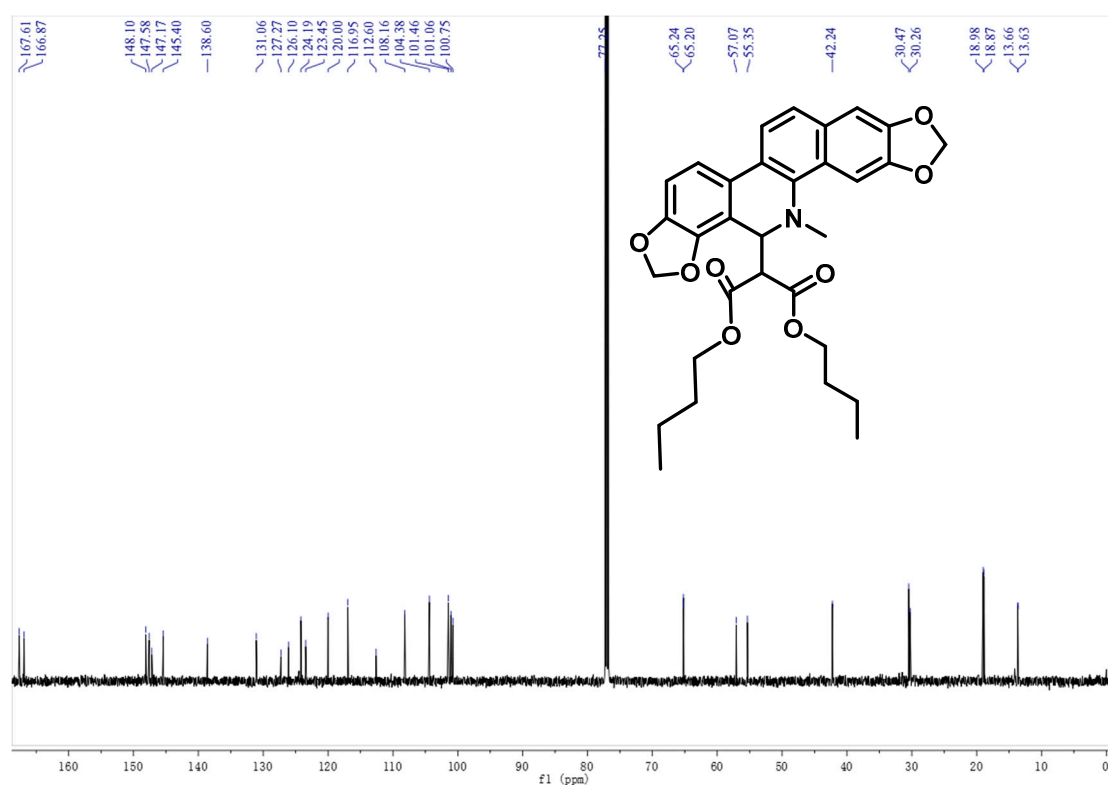

Figure S102.  $^{13}\text{C}$ -NMR spectrum of 2l (150 MHz,  $\text{CDCl}_3$ ).

S-8 #27 RT: 0.12 AV: 1 NL: 5.70E8  
T: FTMS + p ESI Full ms [100.0000-1500.0000]

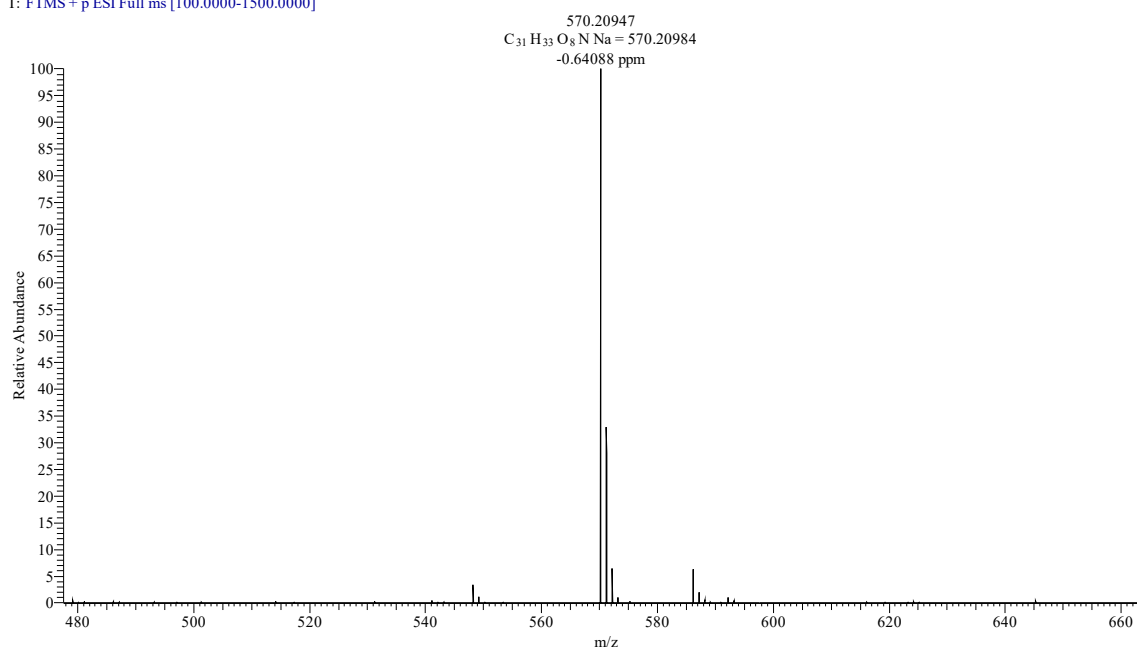

Figure S103. HR-ESI-MS spectrum of 2l.

## The HPLC chromatograms of compounds 1, 2, 1a–1u, and 2a–2l

### HPLC chromatogram conditions

The chromatographic column was obtained from Thermo Science (Part No. 25905-254630), and the chromatograph was run with a flow rate of 1.0 mL/min and a column temperature maintained at 30 °C. The mobile phase system was acetonitrile (A) and 0.1% phosphoric acid aqueous solution (B); injection volume and detection wavelength are presented in Table 1.

**Table S1.** The mobile phase system, injection volume, and detection wavelength of compounds.

| Compd.                                                | A:B (%) | Injection Volume (μL) | Detection Wavelength (nm) |
|-------------------------------------------------------|---------|-----------------------|---------------------------|
| 1, 2, 1a, 1c, 1e–1g, 1l, 1n, 1t, 2b, 2d, 2f–2h, 2j–2l | 70:30   | 10.0                  | 269                       |
| 1b, 1d, 1h–1k, 1m, 1q–1r, 1u, 2a, 2c, 2e, 2i          |         | 0.8                   | 269                       |
| 1o, 1p                                                | 60:40   | 0.8                   | 290                       |
| 1s                                                    | 90:10   | 0.8                   | 285                       |

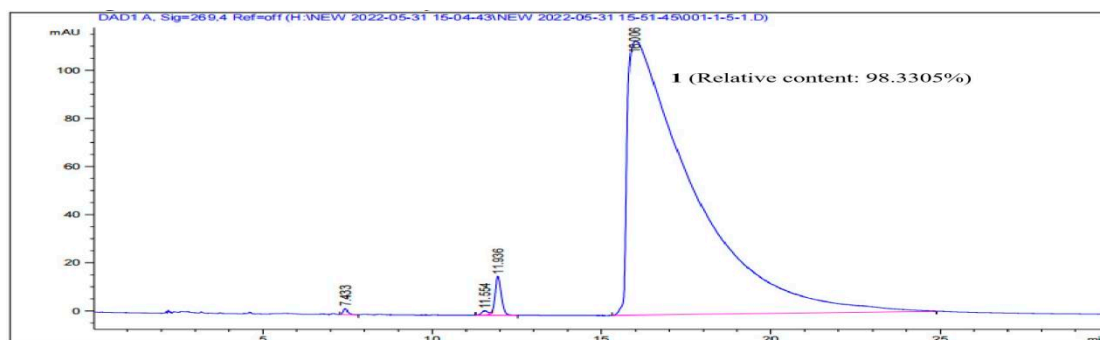

**Figure S104.** HPLC chromatogram of 1.

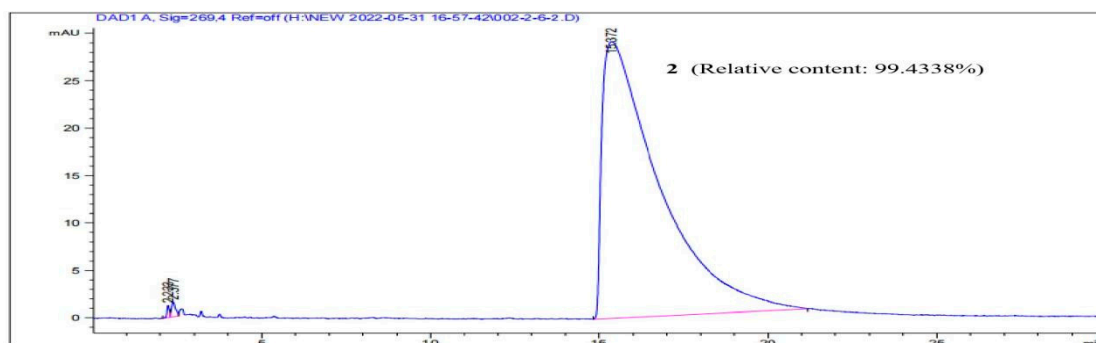

**Figure S105.** HPLC chromatogram of 2.

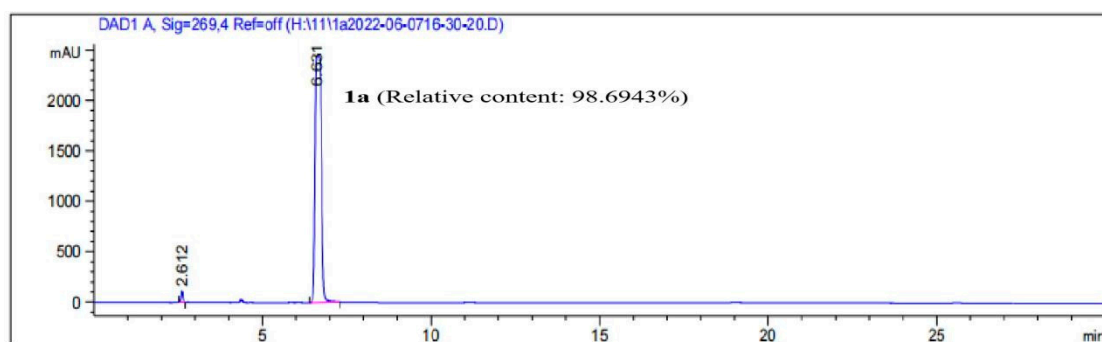

Figure S106. HPLC chromatogram of 1a.

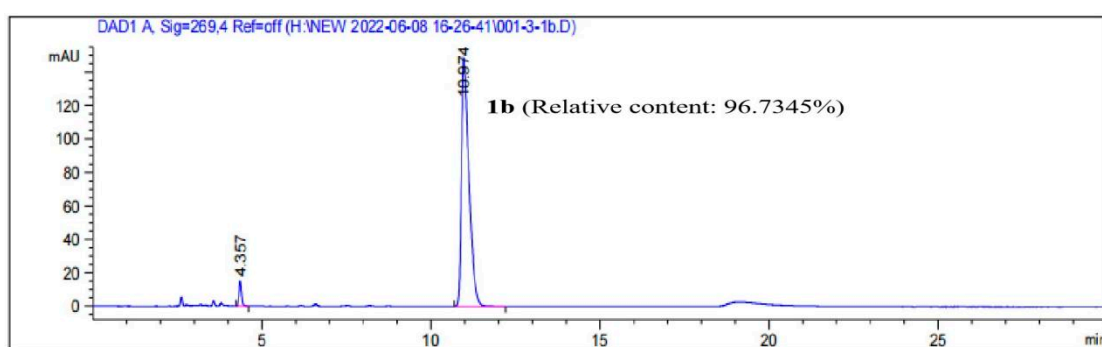

Figure S107. HPLC chromatogram of 1b.

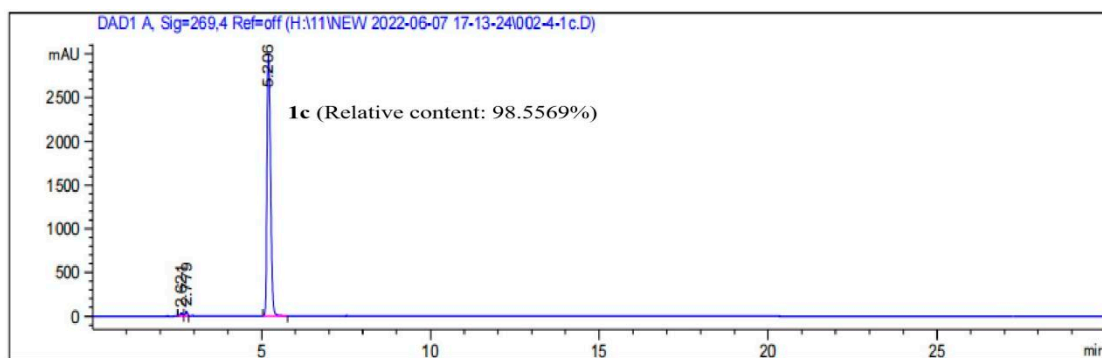

Figure S108. HPLC chromatogram of 1c.

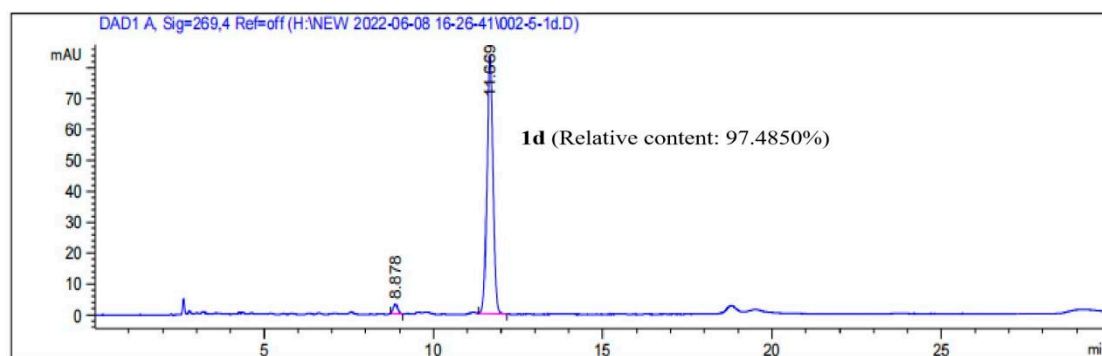Figure S109. HPLC chromatogram of **1d**.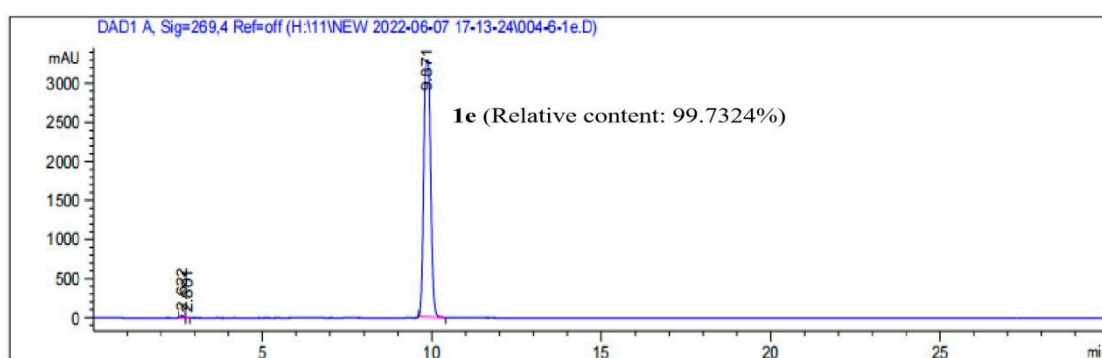Figure S110. HPLC chromatogram of **1e**.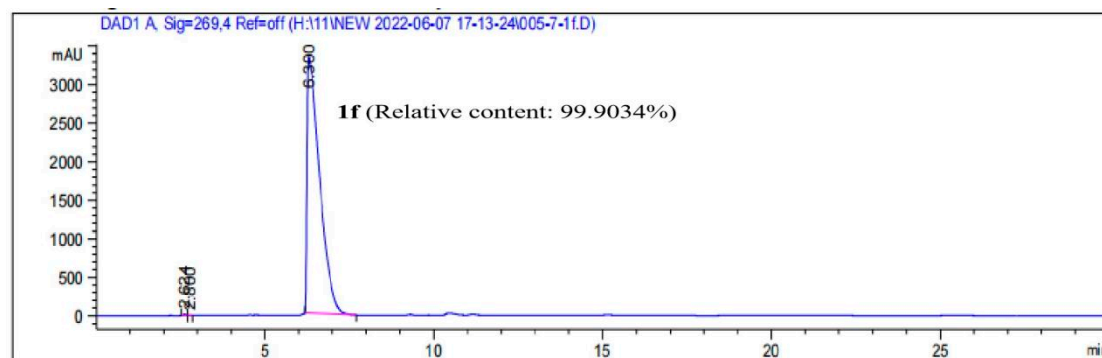Figure S111. HPLC chromatogram of **1f**.

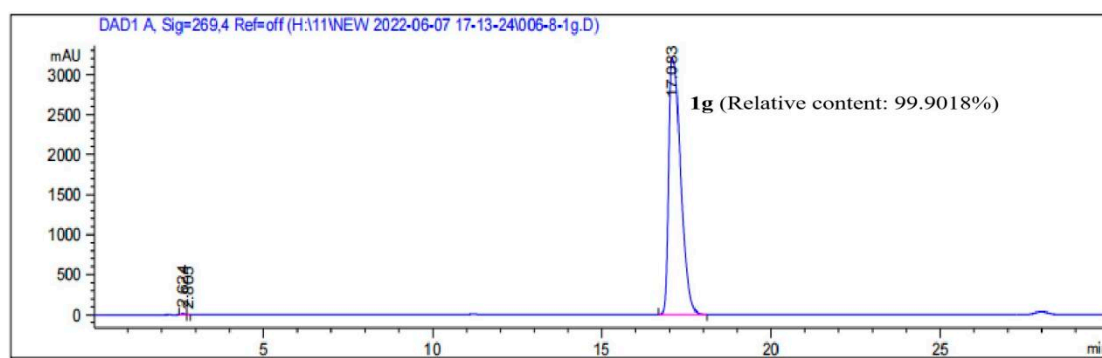Figure S112. HPLC chromatogram of **1g**.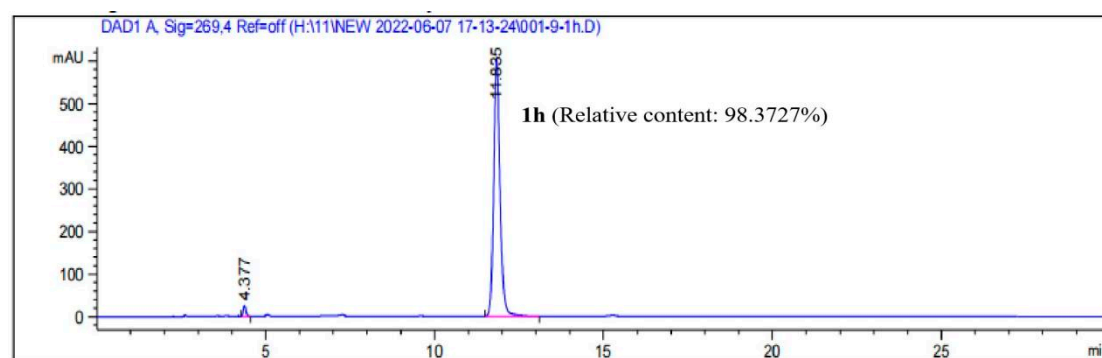Figure S113. HPLC chromatogram of **1h**.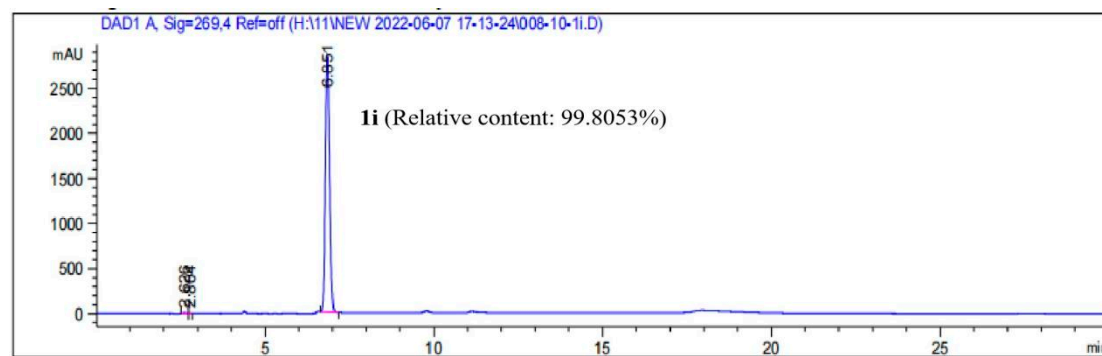Figure S114. HPLC chromatogram of **1i**.

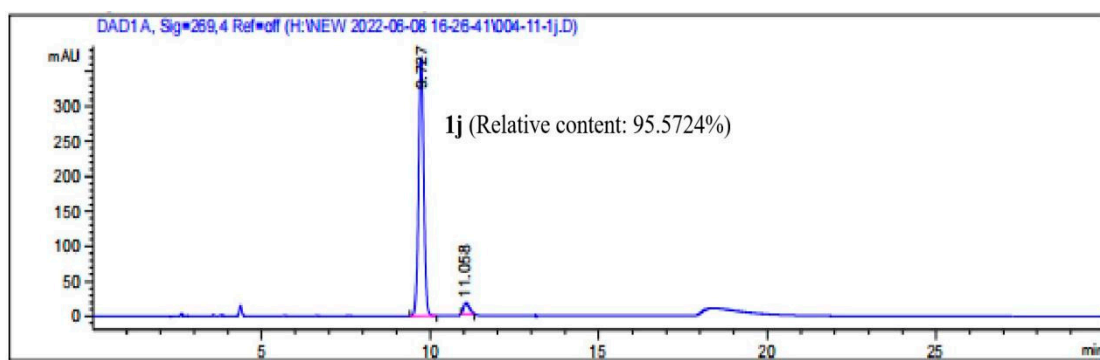

Figure S115. HPLC chromatogram of **1j**.

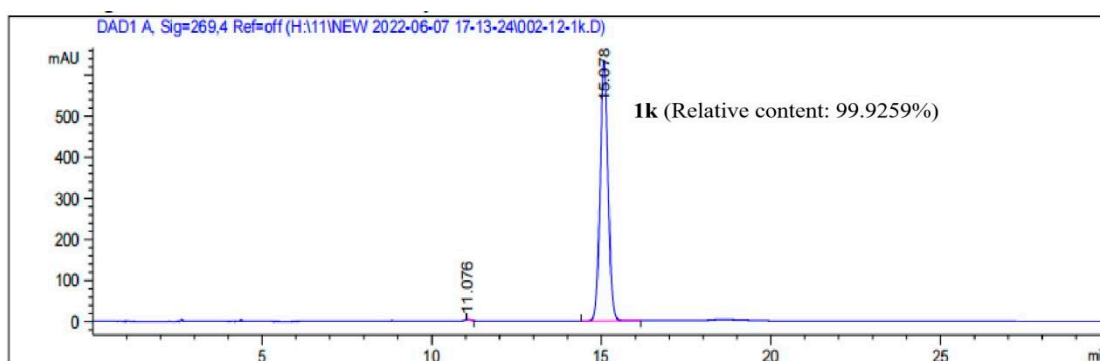

Figure S116. HPLC chromatogram of **1k**.

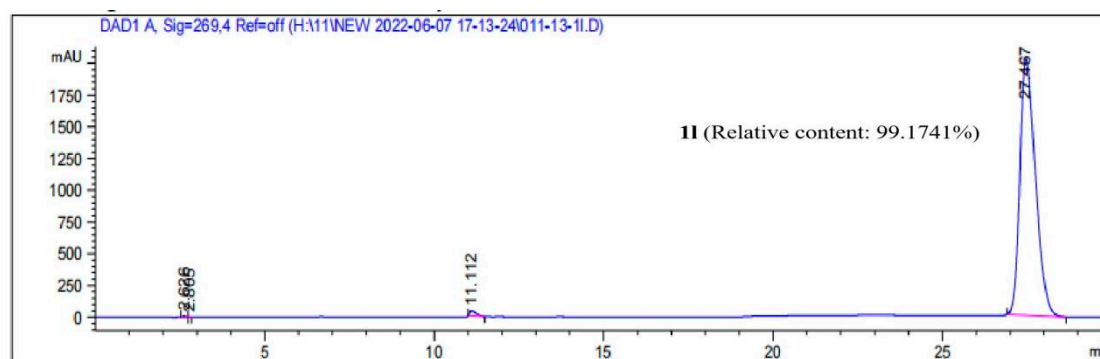

Figure S117. HPLC chromatogram of **1l**.

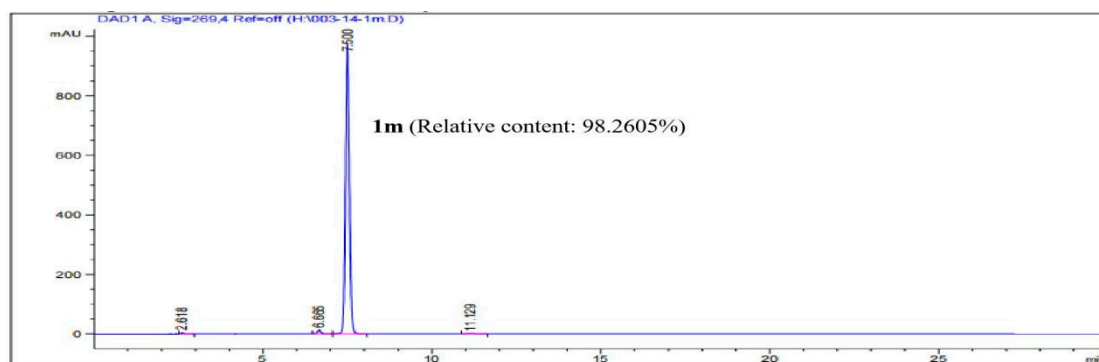

Figure S118. HPLC chromatogram of **1m**.

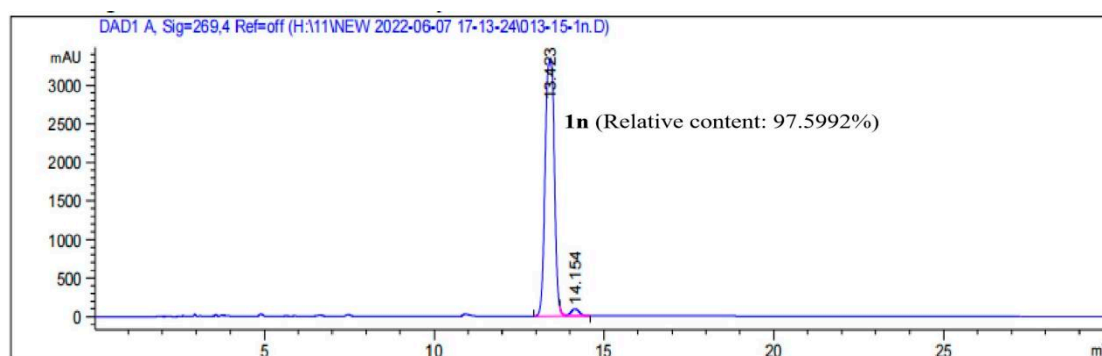

Figure S119. HPLC chromatogram of **1n**.

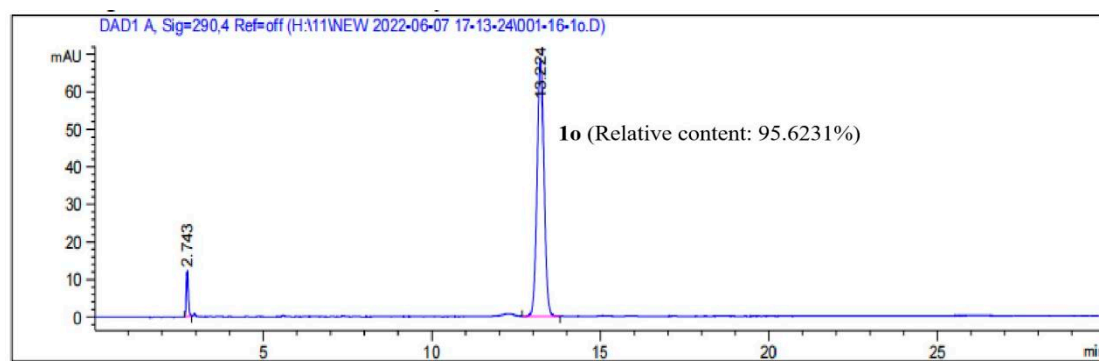

Figure S120. HPLC chromatogram of **1o**.

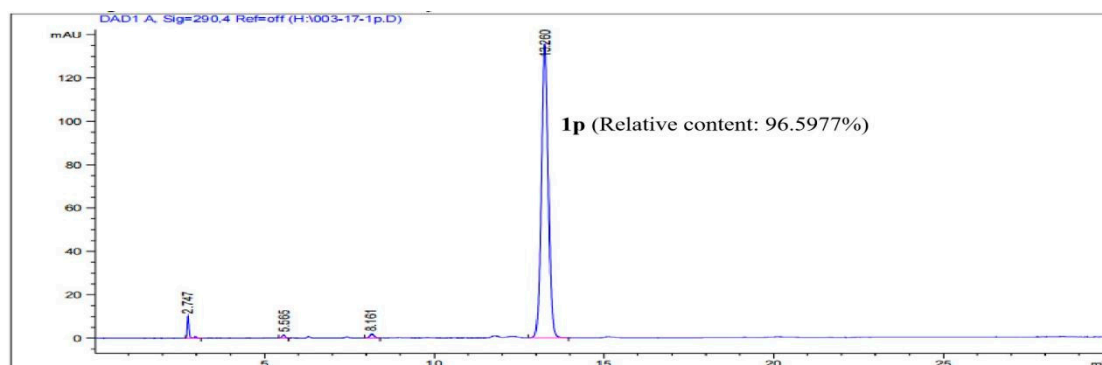Figure S121. HPLC chromatogram of **1p**.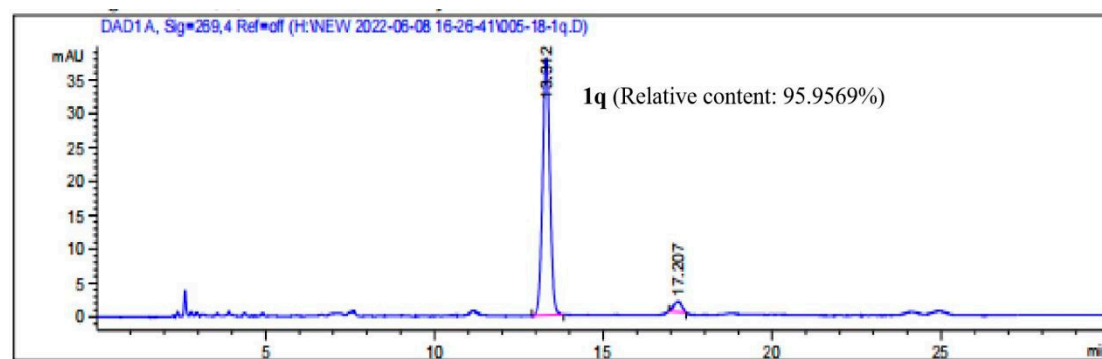Figure S122. HPLC chromatogram of **1q**.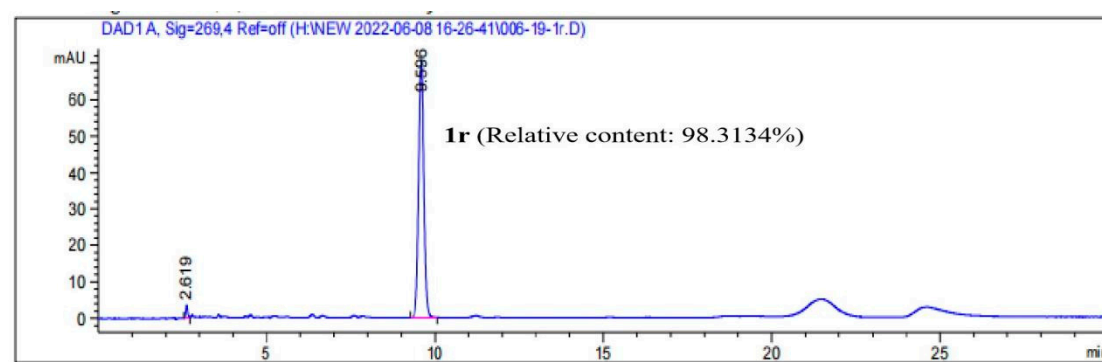Figure S123. HPLC chromatogram of **1r**.



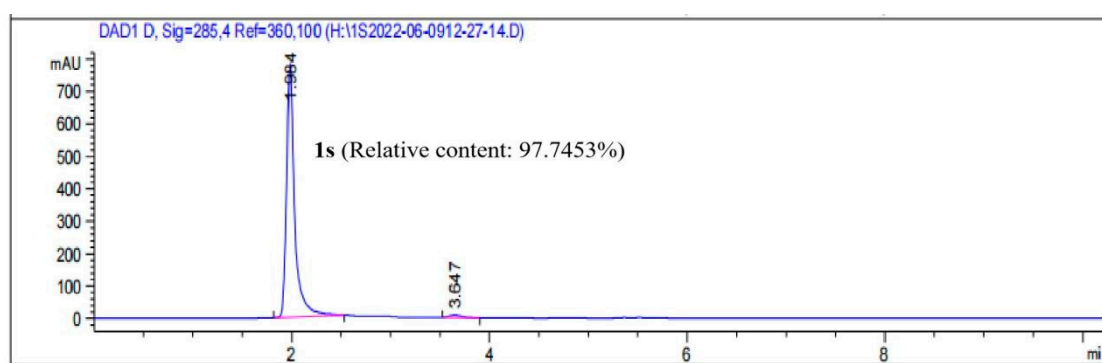

Figure S124. HPLC chromatogram of 1s.

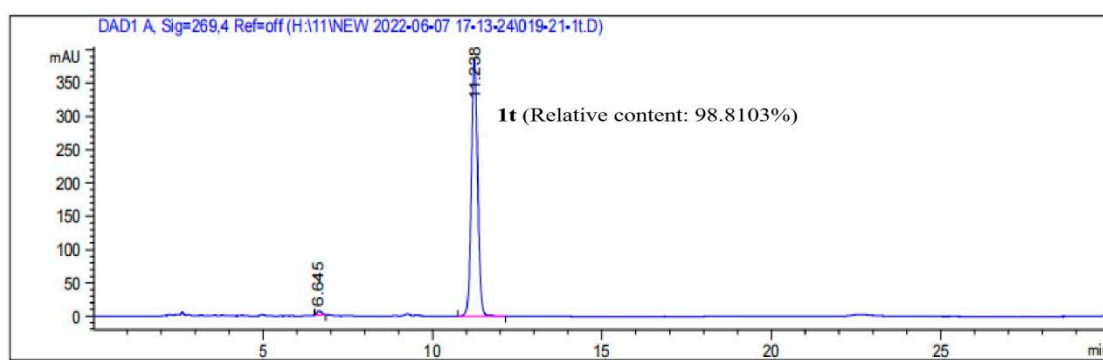

Figure S125. HPLC chromatogram of 1t.

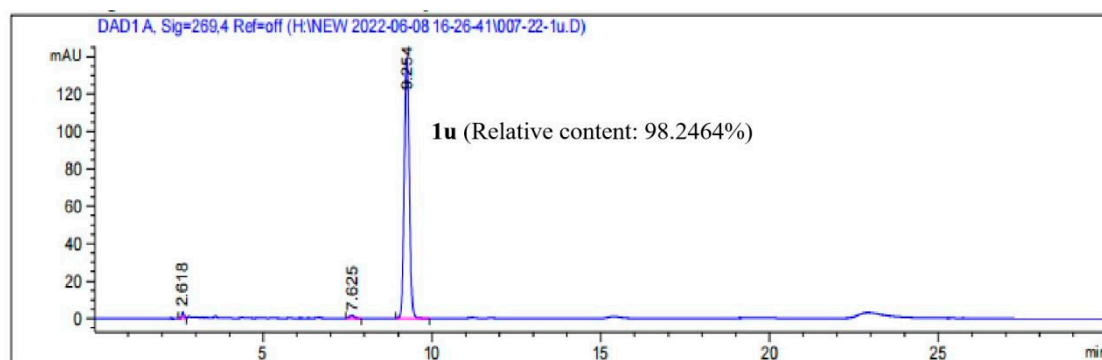

Figure S126. HPLC chromatogram of 1u.

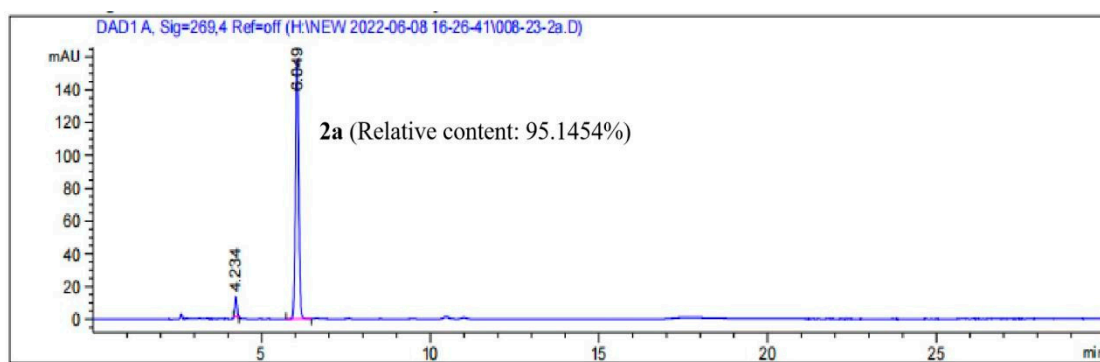Figure S127. HPLC chromatogram of **2a**.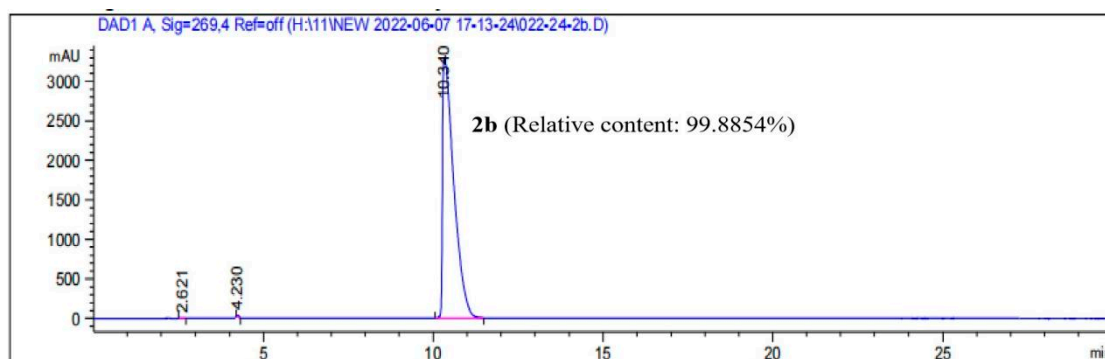Figure S128. HPLC chromatogram of **2b**.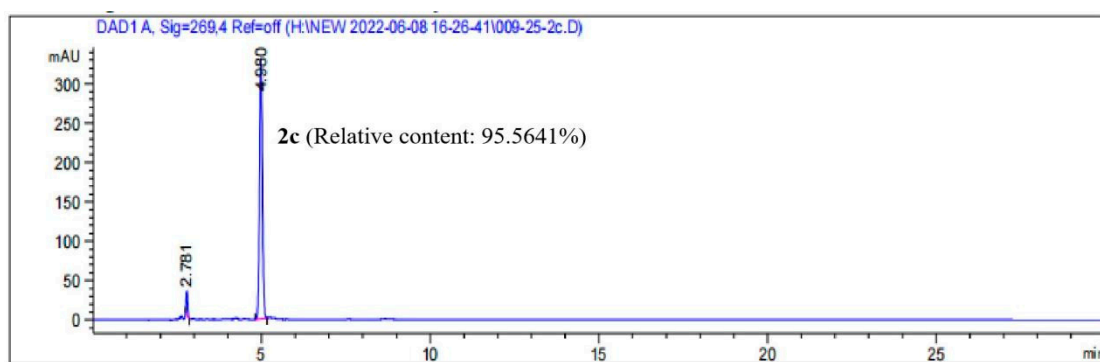Figure S129. HPLC chromatogram of **2c**.

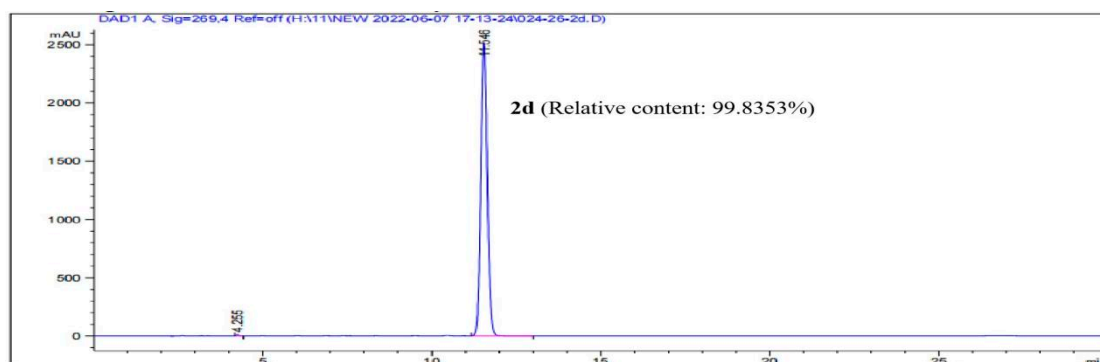

Figure S130. HPLC chromatogram of **2d**.

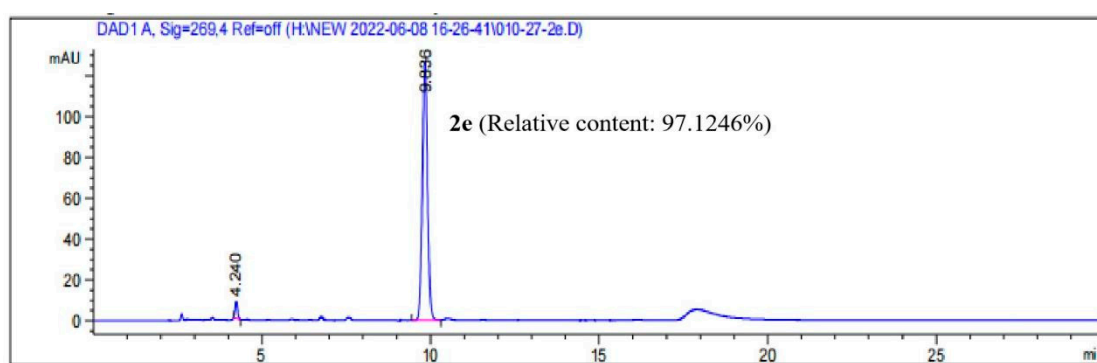

Figure S131. HPLC chromatogram of **2e**.

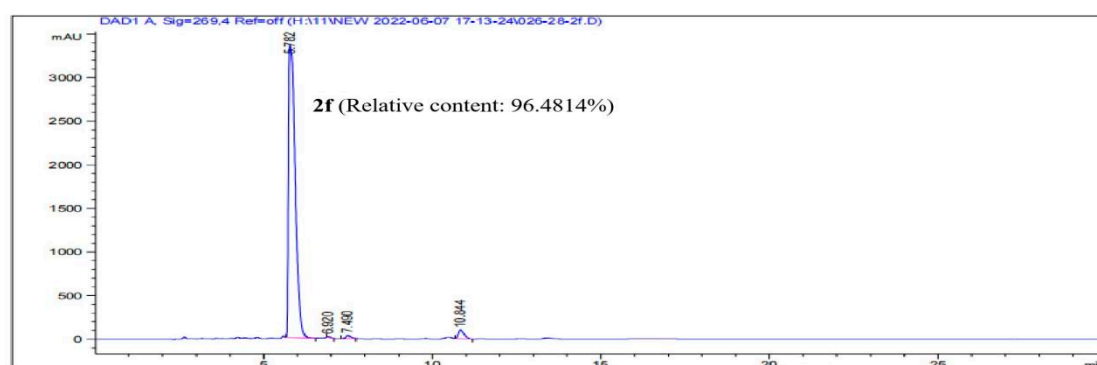

Figure S132. HPLC chromatogram of **2f**.

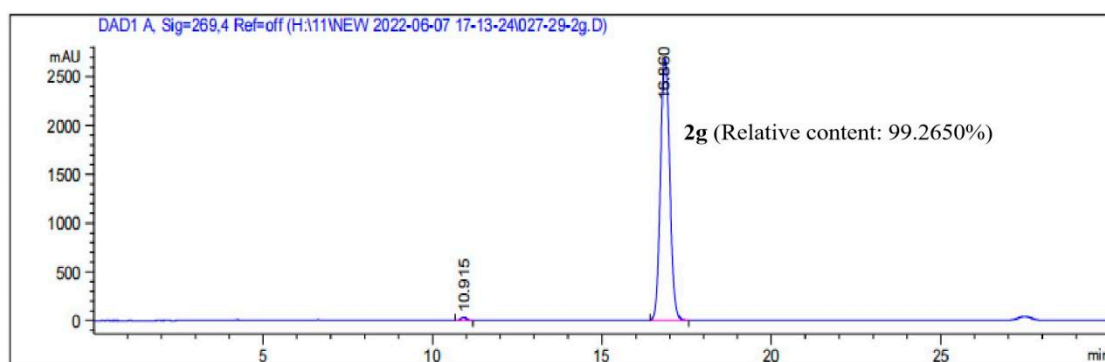Figure S133. HPLC chromatogram of **2g**.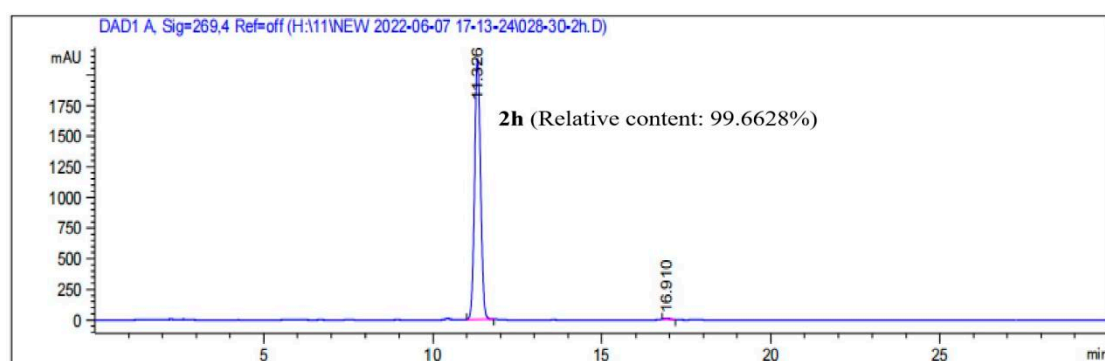Figure S134. HPLC chromatogram of **2h**.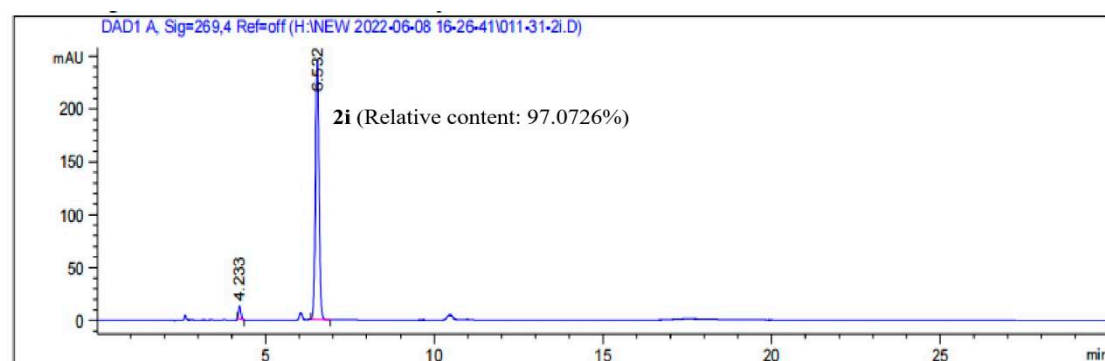Figure S135. HPLC chromatogram of **2i**.

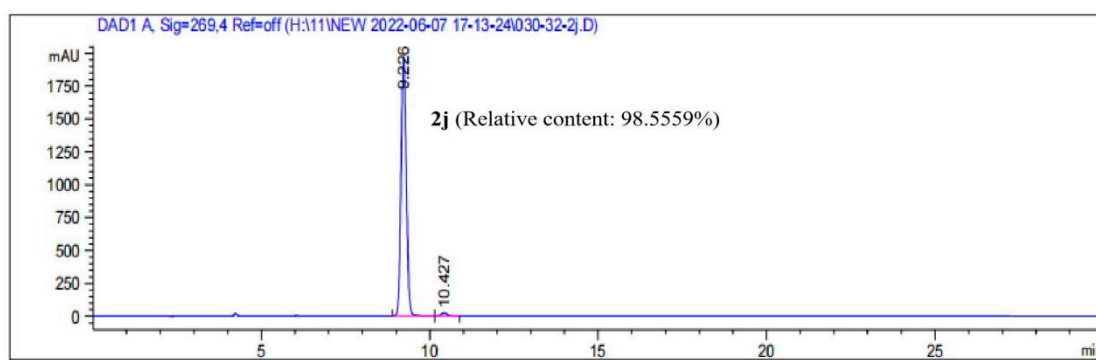

Figure S136. HPLC chromatogram of 2j.

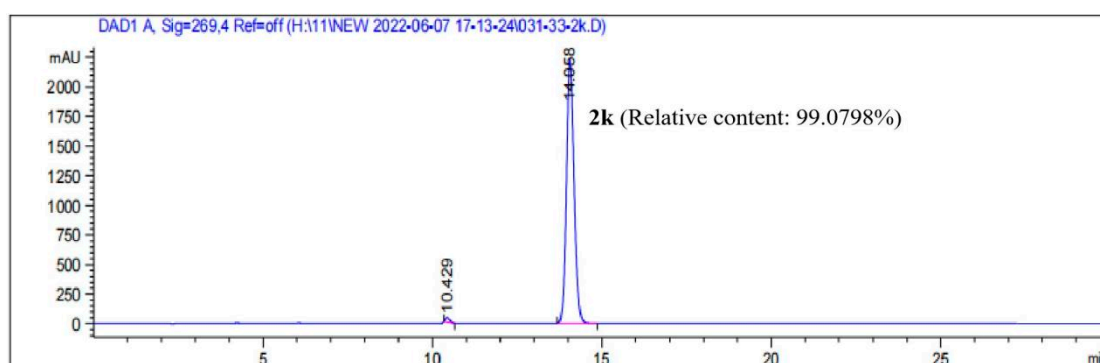

Figure S137. HPLC chromatogram of 2k.

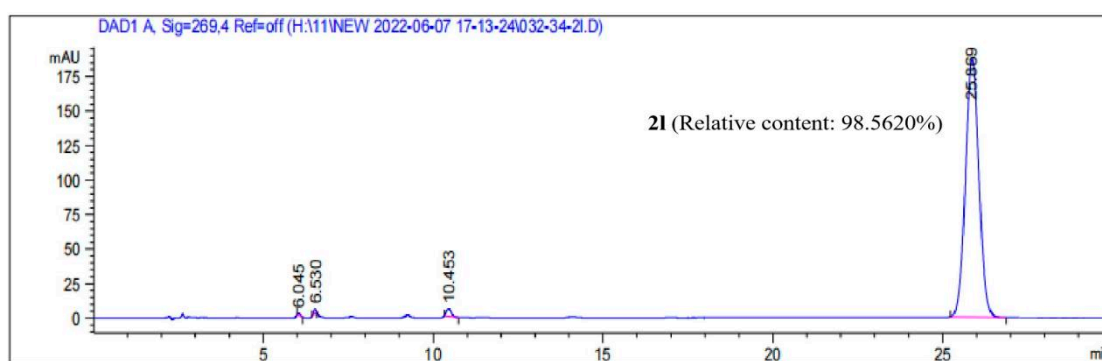

Figure S138. HPLC chromatogram of 2l.

## The preliminary screening results

**Table S2.** Preliminary screening test results.

| Compd.    | Concentration<br>( $\mu$ M) | Cell Inhibition (%) $\pm$ SD |                    |                    |                    |                    |
|-----------|-----------------------------|------------------------------|--------------------|--------------------|--------------------|--------------------|
|           |                             | HL-60                        | K-562              | MV-4-11            | Jurkat, Clone E6-1 | THP-1              |
| <b>1</b>  | 20                          | 93.25% $\pm$ 0.70%           | 21.44% $\pm$ 1.30% | 87.01% $\pm$ 1.85% | 96.77% $\pm$ 0.85% | 93.36% $\pm$ 1.40% |
| <b>1a</b> | 20                          | 14.32% $\pm$ 5.75%           | 3.12% $\pm$ 2.16%  | 14.30% $\pm$ 2.69% | −0.61% $\pm$ 2.55% | 7.53% $\pm$ 1.68%  |
| <b>2</b>  | 20                          | 97.28% $\pm$ 1.81%           | 90.59% $\pm$ 1.36% | 89.27% $\pm$ 3.16% | 97.79% $\pm$ 0.72% | 95.46% $\pm$ 1.40% |
| <b>2a</b> | 20                          | 68.15% $\pm$ 4.39%           | 17.96% $\pm$ 5.52% | 89.03% $\pm$ 2.46% | 97.82% $\pm$ 0.70% | 93.56% $\pm$ 1.57% |

*Trop. J. Pharm. Res.* **2015**, *14*, p1803.
